# Supplementary material for: Derivatives Incorporating Acridine, Pyrrole, and Thiazolidine Rings as Promising Antitumor Agents
Source: MDPI journal article supplement (doi:10.3390/molecules28186616), 2023-09-14
Supplement: s1 [file s1]

# Derivatives Incorporating Acridine, Pyrrole, and Thiazolidine Rings as Promising Antitumor Agents

Monika Garberová <sup>1</sup>, Ivan Potočný <sup>1</sup>, Monika Tvrdoňová <sup>1</sup>, Monika Majirská <sup>2</sup>,  
Martina Bago-Pilátová <sup>2</sup>, Slávka Bekešová <sup>3</sup>, Andrej Kováč <sup>4</sup>, Peter Takáč <sup>4</sup>, Krutika Khiratkar <sup>5</sup>,  
Zuzana Kudličková <sup>1,\*</sup>, Ján Elečko <sup>1</sup> and Mária Vilková <sup>1,\*</sup>

<sup>1</sup> Institute of Chemistry, Faculty of Science, Pavol Jozef Šafárik University, Moyzesova 11, 040 01 Košice, Slovakia; monika.garberova@student.upjs.sk (M.G.); ivan.potocny@upjs.sk (I.P.); monika.tvrdonova@upjs.sk (M.T.); jan.elecko@upjs.sk (J.E.)

<sup>2</sup> Department of Pharmacology, Faculty of Medicine, Pavol Jozef Šafárik University, Trieda SNP 1, 040 01 Košice, Slovakia; monika.majirska@student.upjs.sk (M.M.); martina.pilatova@upjs.sk (M.B.-P.)

<sup>3</sup> Thermo Fisher Scientific, Mlynské Nivy 5, 821 09 Bratislava, Slovakia; slavka.bekesova@thermofisher.com

<sup>4</sup> Department of Pharmacology and Toxicology, University of Veterinary Medicine and Pharmacy, Komenského 73, 041 81 Košice, Slovakia; rej.kovac@uvlf.sk (A.K.); peter.takac@uvlf.sk (P.T.)

<sup>5</sup> Institute of Neuroimmunology, Slovak Academy of Sciences, Dúbravská Cesta 9, 845 10 Bratislava, Slovakia; krutika.khiratkar@savba.sk

\* Correspondence: zuzana.kudlickova@upjs.sk (Z.K.); maria.vilkova@upjs.sk (M.V.)

## Content

|     |                                                                                                                                                                |    |
|-----|----------------------------------------------------------------------------------------------------------------------------------------------------------------|----|
| 1   | Figures and Tables related to the Results and Discussion section .....                                                                                         | 3  |
| 2   | NMR and IR spectra of synthesized derivatives .....                                                                                                            | 9  |
| 2.1 | 3-{4'-Cyano-5'-oxo-1',5'-dihydro-10H-spiro[acridine-9,2'-pyrrol]-1'-yl}-1-phenylthiourea ( <b>6a</b> )<br>9                                                    |    |
| 2.2 | 3-{4'-Cyano-5'-oxo-1',5'-dihydro-10H-spiro[acridine-9,2'-pyrrol]-1'-yl}-1-(4-methoxyphenyl)thiourea ( <b>6b</b> ) .....                                        | 12 |
| 2.3 | 3-{4'-Cyano-5'-oxo-1',5'-dihydro-10H-spiro[acridine-9,2'-pyrrol]-1'-yl}-1-(3-methoxyphenyl)thiourea ( <b>6c</b> ).....                                         | 15 |
| 2.4 | 3-{4'-Cyano-5'-oxo-1',5'-dihydro-10H-spiro[acridine-9,2'-pyrrol]-1'-yl}-1-(4-fluorophenyl)thiourea ( <b>6d</b> ).....                                          | 18 |
| 2.5 | 3-{4'-Cyano-5'-oxo-1',5'-dihydro-10H-spiro[acridine-9,2'-pyrrol]-1'-yl}-1-(4-nitrophenyl)thiourea ( <b>6e</b> ).....                                           | 21 |
| 2.6 | 5'-Oxo-1'-{[(2Z)-4-oxo-3-phenyl-1,3-thiazolidin-2-ylidene]amino}-1',5'-dihydro-10H-spiro[acridine-9,2'-pyrrole]-4'-carbonitrile ( <b>7a</b> ).....             | 24 |
| 2.7 | 1'-{[(2Z)-3-(4-Methoxyphenyl)-4-oxo-1,3-thiazolidin-2-ylidene]amino}-5'-oxo-1',5'-dihydro-10H-spiro[acridine-9,2'-pyrrole]-4'-carbonitrile ( <b>7b</b> ) ..... | 27 |
| 2.8 | 1'-{[(2Z)-3-(3-Methoxyphenyl)-4-oxo-1,3-thiazolidin-2-ylidene]amino}-5'-oxo-1',5'-dihydro-10H-spiro[acridine-9,2'-pyrrole]-4'-carbonitrile ( <b>7c</b> ).....  | 30 |

|      |                                                                                                                                                                                 |    |
|------|---------------------------------------------------------------------------------------------------------------------------------------------------------------------------------|----|
| 2.9  | 1'-{[(2Z)-3-(4-Fluorophenyl)-4-oxo-1,3-thiazolidin-2-ylidene]amino}-5'-oxo-1',5'-dihydro-10H-spiro[acridine-9,2'-pyrrole]-4'-carbonitrile ( <b>7d</b> ) .....                   | 33 |
| 2.10 | 1'-{[(2Z)-3-(4-Nitrophenyl)-4-oxo-1,3-thiazolidin-2-ylidene]amino}-5'-oxo-1',5'-dihydro-10H-spiro[acridine-9,2'-pyrrole]-4'-carbonitrile ( <b>7e</b> ) .....                    | 36 |
| 2.11 | Ethyl 2-[(2Z,5Z)-2-({4'-cyano-5'-oxo-1',5'-dihydro-10H-spiro[acridine-9,2'-pyrrol]-1'-yl}imino)-4-oxo-3-phenyl-1,3-thiazolidin-5-ylidene]acetate ( <b>8a</b> ) .....            | 39 |
| 2.12 | Ethyl 2-[(2Z,5Z)-2-({4'-cyano-5'-oxo-1',5'-dihydro-10H-spiro[acridine-9,2'-pyrrol]-1'-yl}imino)-3-(4-methoxyphenyl)-4-oxo-1,3-thiazolidin-5-ylidene]acetate ( <b>8b</b> ) ..... | 42 |
| 2.13 | Ethyl 2-[(2Z,5Z)-2-({4'-cyano-5'-oxo-1',5'-dihydro-10H-spiro[acridine-9,2'-pyrrol]-1'-yl}imino)-3-(3-methoxyphenyl)-4-oxo-1,3-thiazolidin-5-ylidene]acetate ( <b>8c</b> ) ..... | 45 |
| 2.14 | Ethyl 2-[(2Z,5Z)-2-({4'-cyano-5'-oxo-1',5'-dihydro-10H-spiro[acridine-9,2'-pyrrol]-1'-yl}imino)-3-(4-fluorophenyl)-4-oxo-1,3-thiazolidin-5-ylidene]acetate ( <b>8d</b> ) .....  | 48 |
| 2.15 | Ethyl 2-[(2Z,5Z)-2-({4'-cyano-5'-oxo-1',5'-dihydro-10H-spiro[acridine-9,2'-pyrrol]-1'-yl}imino)-3-(4-nitrophenyl)-4-oxo-1,3-thiazolidin-5-ylidene]acetate ( <b>8e</b> ) .....   | 51 |
| 2.16 | 1'-{[(2Z)-5-Methyl-4-oxo-3-phenyl-1,3-thiazolidin-2-ylidene]amino}-5'-oxo-1',5'-dihydro-10H-spiro[acridine-9,2'-pyrrole]-4'-carbonitrile ( <b>9a</b> ) .....                    | 54 |
| 2.17 | 1'-{[(2Z)-3-(4-Methoxyphenyl)-5-methyl-4-oxo-1,3-thiazolidin-2-ylidene]amino}-5'-oxo-1',5'-dihydro-10H-spiro[acridine-9,2'-pyrrole]-4'-carbonitrile ( <b>9b</b> ) .....         | 57 |
| 2.18 | 1'-{[(2Z)-3-(3-Methoxyphenyl)-5-methyl-4-oxo-1,3-thiazolidin-2-ylidene]amino}-5'-oxo-1',5'-dihydro-10H-spiro[acridine-9,2'-pyrrole]-4'-carbonitrile ( <b>9c</b> ) .....         | 60 |
| 2.19 | 1'-{[(2Z)-3-(4-Fluorophenyl)-5-methyl-4-oxo-1,3-thiazolidin-2-ylidene]amino}-5'-oxo-1',5'-dihydro-10H-spiro[acridine-9,2'-pyrrole]-4'-carbonitrile ( <b>9d</b> ) .....          | 63 |
| 2.20 | 1'-{[(2Z)-5-Methyl-3-(4-nitrophenyl)-4-oxo-1,3-thiazolidin-2-ylidene]amino}-5'-oxo-1',5'-dihydro-10H-spiro[acridine-9,2'-pyrrole]-4'-carbonitrile ( <b>9e</b> ) .....           | 66 |
| 2.21 | 5'-Oxo-1'-{[(2Z)-4-oxo-3-phenyl-5-propyl-1,3-thiazolidin-2-ylidene]amino}-1',5'-dihydro-10H-spiro[acridine-9,2'-pyrrole]-4'-carbonitrile ( <b>10a</b> ) .....                   | 69 |
| 2.22 | 1'-{[(2Z)-3-(4-Methoxyphenyl)-4-oxo-5-propyl-1,3-thiazolidin-2-ylidene]amino}-5'-oxo-1',5'-dihydro-10H-spiro[acridine-9,2'-pyrrole]-4'-carbonitrile ( <b>10b</b> ) .....        | 72 |
| 2.23 | 1'-{[(2Z)-3-(3-Methoxyphenyl)-4-oxo-5-propyl-1,3-thiazolidin-2-ylidene]amino}-5'-oxo-1',5'-dihydro-10H-spiro[acridine-9,2'-pyrrole]-4'-carbonitrile ( <b>10c</b> ) .....        | 75 |
| 2.24 | 1'-{[(2Z)-3-(4-Fluorophenyl)-4-oxo-5-propyl-1,3-thiazolidin-2-ylidene]amino}-5'-oxo-1',5'-dihydro-10H-spiro[acridine-9,2'-pyrrole]-4'-carbonitrile ( <b>10d</b> ) .....         | 78 |
| 2.25 | 1'-{[(2Z)-3-(4-Nitrophenyl)-4-oxo-5-propyl-1,3-thiazolidin-2-ylidene]amino}-5'-oxo-1',5'-dihydro-10H-spiro[acridine-9,2'-pyrrole]-4'-carbonitrile ( <b>10e</b> ) .....          | 81 |

# 1 Figures and Tables related to the Results and Discussion section

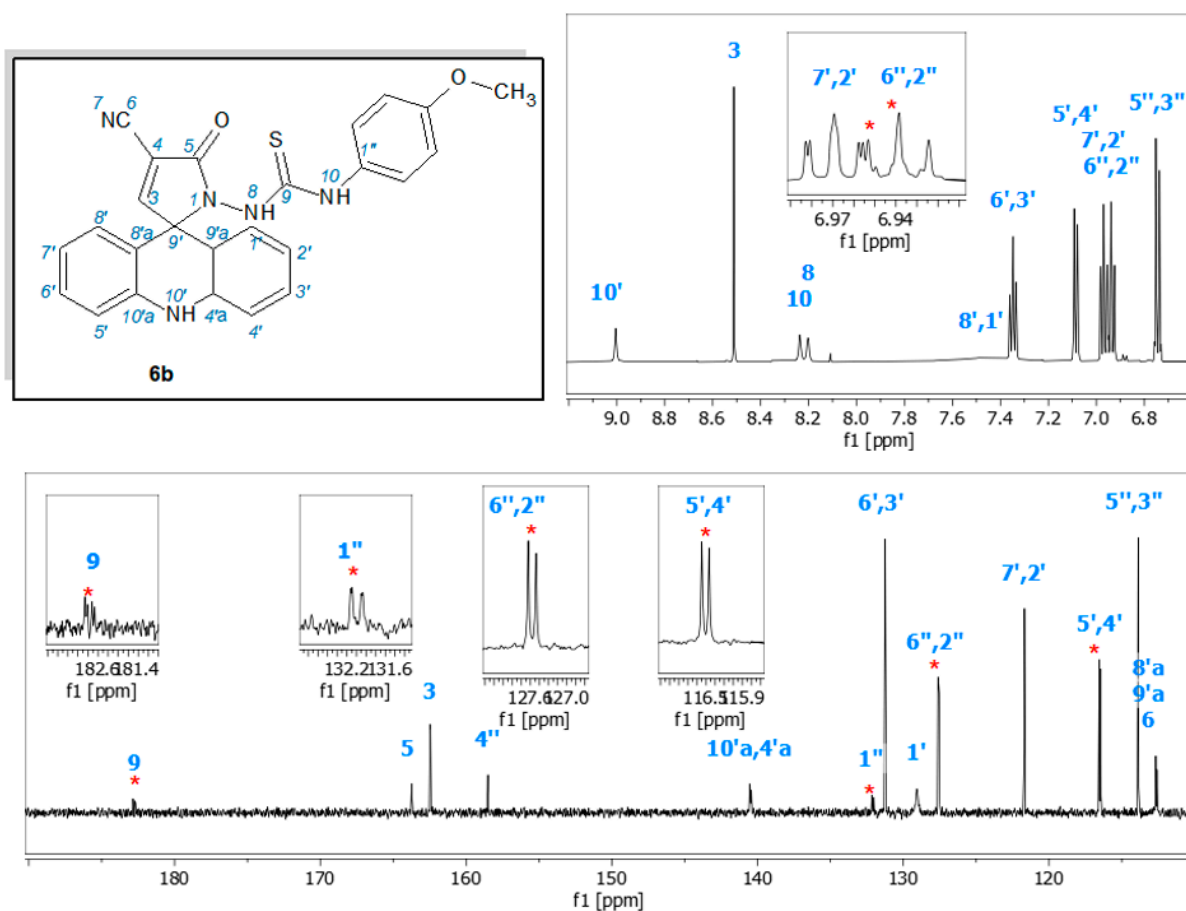

**Figure S1.** <sup>1</sup>H (600 MHz, acetone-d<sub>6</sub>) and <sup>13</sup>C NMR (150 MHz, acetone-d<sub>6</sub>) spectra of derivative **6b**. Red stars indicate doubled signals.

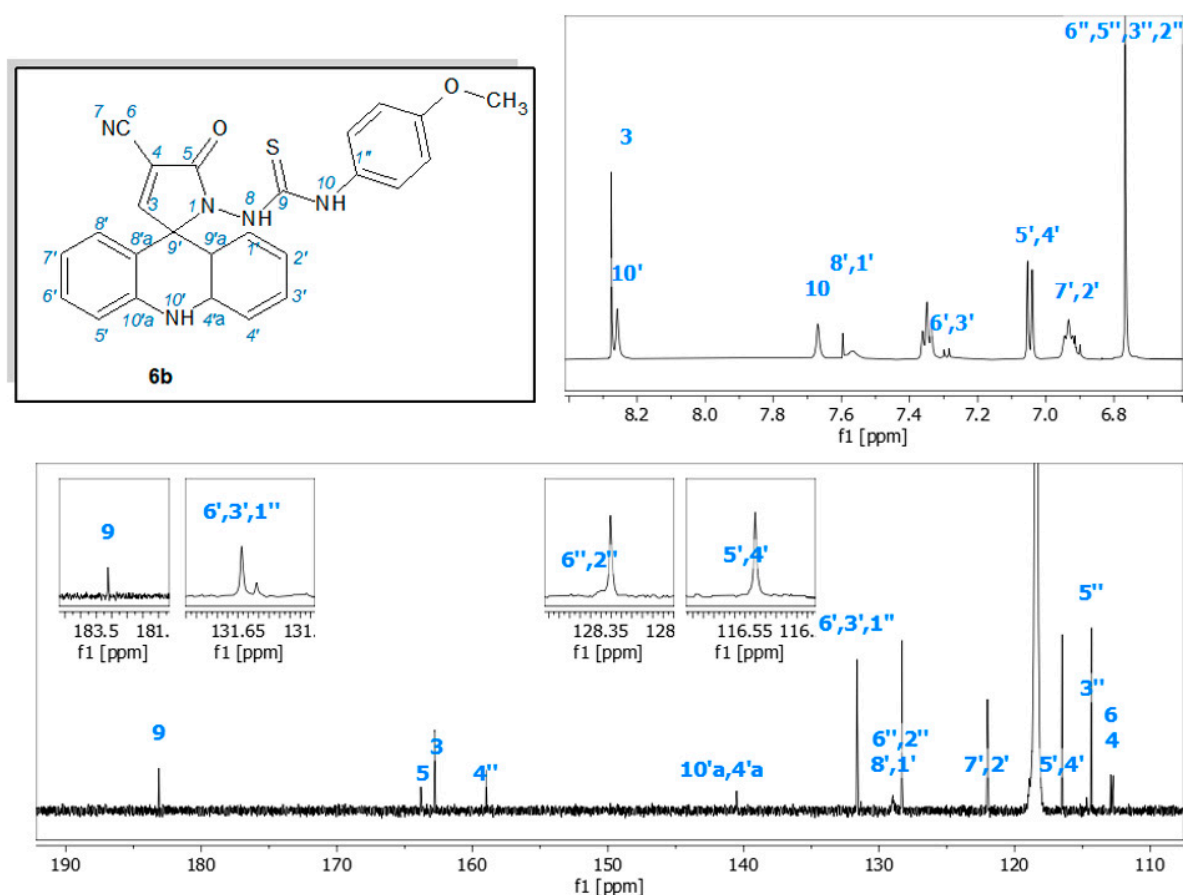

**Figure S2.**  $^1\text{H}$  (600 MHz, acetonitrile- $\text{d}_3$ ) and  $^{13}\text{C}$  NMR (150 MHz, acetonitrile- $\text{d}_3$ ) spectra of derivative **6b**.

**Table S1.** Reaction times and yields of reactions of spiro compounds **6a–e** with bifunctional reagents.

| Product    | R                      | R <sup>1</sup> | Reagent | Yield [%] | Reaction time [h] |
|------------|------------------------|----------------|---------|-----------|-------------------|
| <b>7a</b>  | Ph                     | H              | MBA     | 79        | 2                 |
| <b>7b</b>  | (4-OMe)Ph              | H              | MBA     | 66        | 2,5               |
| <b>7c</b>  | (3-OMe)Ph              | H              | MBA     | 83        | 2,5               |
| <b>7d</b>  | (4-F)Ph                | H              | MBA     | 70        | 2                 |
| <b>7e</b>  | (4-NO <sub>2</sub> )Ph | H              | MBA     | 41        | 3                 |
| <b>8a</b>  | Ph                     | =CH-COOEt      | DEAD    | 75        | 7                 |
| <b>8b</b>  | (4-OMe)Ph              | =CH-COOEt      | DEAD    | 57        | 7                 |
| <b>8c</b>  | (3-OMe)Ph              | =CH-COOEt      | DEAD    | 66        | 7                 |
| <b>8d</b>  | (4-F)Ph                | =CH-COOEt      | DEAD    | 60        | 7                 |
| <b>8e</b>  | (4-NO <sub>2</sub> )Ph | =CH-COOEt      | DEAD    | 60        | 7                 |
| <b>9a</b>  | Ph                     | Me             | EBP     | 77        | 3,5               |
| <b>9b</b>  | (4-OMe)Ph              | Me             | EBP     | 64        | 3                 |
| <b>9c</b>  | (3-OMe)Ph              | Me             | EBP     | 64        | 2,5               |
| <b>9d</b>  | (4-F)Ph                | Me             | EBP     | 73        | 2                 |
| <b>9e</b>  | (4-NO <sub>2</sub> )Ph | Me             | EBP     | 38        | 4                 |
| <b>10a</b> | Ph                     | Pr             | EBV     | 69        | 24                |
| <b>10b</b> | (4-OMe)Ph              | Pr             | EBV     | 46        | 48                |
| <b>10c</b> | (3-OMe)Ph              | Pr             | EBV     | 71        | 24                |
| <b>10d</b> | (4-F)Ph                | Pr             | EBV     | 46        | 48                |



|            |                        |    |     |    |    |
|------------|------------------------|----|-----|----|----|
| <b>10e</b> | (4-NO <sub>2</sub> )Ph | Pr | EBV | 60 | 48 |
|------------|------------------------|----|-----|----|----|

**Table S2.** HR MS data for compounds **6a–e**, **7a–e**, **8a–e**, **9a–e** and **10a–e**.

|           |  | Name                                                                                                                                       | Formula                                                          | Exact mass<br>[g.mol <sup>-1</sup> ] | Measured mass<br>[g.mol <sup>-1</sup> ] | m/z unit                | Mass error<br>[ppm] |
|-----------|--|--------------------------------------------------------------------------------------------------------------------------------------------|------------------------------------------------------------------|--------------------------------------|-----------------------------------------|-------------------------|---------------------|
| <b>6a</b> |  | 3-{4'-cyano-5'-oxo-1',5'-dihydro-10H-spiro[acridine-9,2'-pyrrol]-1'-yl}-1-phenylthiourea                                                   | C <sub>24</sub> H <sub>17</sub> N <sub>5</sub> OS                | 424.12266                            | 424.12300                               | 3.40 × 10 <sup>-4</sup> | 0.80165             |
| <b>6b</b> |  | 3-{4'-cyano-5'-oxo-1',5'-dihydro-10H-spiro[acridine-9,2'-pyrrol]-1'-yl}-1-(4-methoxyphenyl)thiourea                                        | C <sub>25</sub> H <sub>19</sub> N <sub>5</sub> O <sub>2</sub> S  | 454.13322                            | 454.13420                               | 9.80 × 10 <sup>-4</sup> | 2.15796             |
| <b>6c</b> |  | 3-{4'-cyano-5'-oxo-1',5'-dihydro-10H-spiro[acridine-9,2'-pyrrol]-1'-yl}-1-(3-methoxyphenyl)thiourea                                        | C <sub>25</sub> H <sub>19</sub> N <sub>5</sub> O <sub>2</sub> S  | 454.13322                            | 454.13390                               | 6.80 × 10 <sup>-4</sup> | 1.49736             |
| <b>6d</b> |  | 3-{4'-cyano-5'-oxo-1',5'-dihydro-10H-spiro[acridine-9,2'-pyrrol]-1'-yl}-1-(4-fluorophenyl)thiourea                                         | C <sub>24</sub> H <sub>16</sub> FN <sub>5</sub> OS               | 442.11324                            | 442.11340                               | 1.60 × 10 <sup>-4</sup> | 0.36190             |
| <b>6e</b> |  | 3-{4'-cyano-5'-oxo-1',5'-dihydro-10H-spiro[acridine-9,2'-pyrrol]-1'-yl}-1-(4-nitrophenyl)thiourea                                          | C <sub>24</sub> H <sub>16</sub> N <sub>6</sub> O <sub>3</sub> S  | 469.10774                            | 469.10790                               | 1.60 × 10 <sup>-4</sup> | 0.34107             |
| <b>7a</b> |  | 5'-oxo-1'-{[(2Z)-4-oxo-3-phenyl-1,3-thiazolidin-2-ylidene]amino}-1',5'-dihydro-10H-spiro[acridine-9,2'-pyrrole]-4'-carbonitrile            | C <sub>26</sub> H <sub>17</sub> N <sub>5</sub> O <sub>2</sub> S  | 464.11757                            | 464.11790                               | 3.30 × 10 <sup>-4</sup> | 0.71103             |
| <b>7b</b> |  | 1'-{[(2Z)-3-(4-methoxyphenyl)-4-oxo-1,3-thiazolidin-2-ylidene]amino}-5'-oxo-1',5'-dihydro-10H-spiro[acridine-9,2'-pyrrole]-4'-carbonitrile | C <sub>27</sub> H <sub>19</sub> N <sub>5</sub> O <sub>3</sub> S  | 494.12814                            | 494.12880                               | 6.60 × 10 <sup>-4</sup> | 1.33569             |
| <b>7c</b> |  | 1'-{[(2Z)-3-(3-methoxyphenyl)-4-oxo-1,3-thiazolidin-2-ylidene]amino}-5'-oxo-1',5'-dihydro-10H-spiro[acridine-9,2'-pyrrole]-4'-carbonitrile | C <sub>27</sub> H <sub>19</sub> N <sub>5</sub> O <sub>3</sub> S  | 494.12814                            | 494.12880                               | 6.60 × 10 <sup>-4</sup> | 1.33569             |
| <b>7d</b> |  | 1'-{[(2Z)-3-(4-fluorophenyl)-4-oxo-1,3-thiazolidin-2-ylidene]amino}-5'-oxo-1',5'-dihydro-10H-spiro[acridine-9,2'-pyrrole]-4'-carbonitrile  | C <sub>26</sub> H <sub>16</sub> FN <sub>5</sub> O <sub>2</sub> S | 482.10815                            | 482.10870                               | 5.50 × 10 <sup>-4</sup> | 1.14082             |
| <b>7e</b> |  | 1'-{[(2Z)-3-(4-nitrophenyl)-4-oxo-1,3-thiazolidin-2-ylidene]amino}-5'-oxo-1',5'-dihydro-10H-spiro[acridine-9,2'-pyrrole]-4'-carbonitrile   | C <sub>26</sub> H <sub>16</sub> N <sub>6</sub> O <sub>4</sub> S  | 509.10265                            | 509.10330                               | 6.50 × 10 <sup>-4</sup> | 1.27676             |

|           |                                                                                     |                                                                                                                                                                    |                                                                  |           |           |                         |         |
|-----------|-------------------------------------------------------------------------------------|--------------------------------------------------------------------------------------------------------------------------------------------------------------------|------------------------------------------------------------------|-----------|-----------|-------------------------|---------|
| <b>8a</b> | 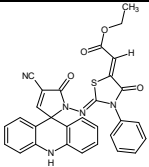    | <i>ethyl 2-[(2Z,5Z)-2-({4'-cyano-5'-oxo-1',5'-dihydro-10H-spiro[acridine-9,2'-pyrrol]-1'-yl}imino)-4-oxo-3-phenyl-1,3-thiazolidin-5-ylidene]acetate</i>            | C <sub>30</sub> H <sub>21</sub> N <sub>5</sub> O <sub>4</sub> S  | 548.13870 | 548.13920 | 5.00 × 10 <sup>-4</sup> | 0.91218 |
| <b>8b</b> |    | <i>ethyl 2-[(2Z,5Z)-2-({4'-cyano-5'-oxo-1',5'-dihydro-10H-spiro[acridine-9,2'-pyrrol]-1'-yl}imino)-3-(4-methoxyphenyl)-4-oxo-1,3-thiazolidin-5-ylidene]acetate</i> | C <sub>31</sub> H <sub>23</sub> N <sub>5</sub> O <sub>5</sub> S  | 578.14927 | 578.15000 | 7.30 × 10 <sup>-4</sup> | 1.26265 |
| <b>8c</b> |    | <i>ethyl 2-[(2Z,5Z)-2-({4'-cyano-5'-oxo-1',5'-dihydro-10H-spiro[acridine-9,2'-pyrrol]-1'-yl}imino)-3-(3-methoxyphenyl)-4-oxo-1,3-thiazolidin-5-ylidene]acetate</i> | C <sub>31</sub> H <sub>23</sub> N <sub>5</sub> O <sub>5</sub> S  | 578.14927 | 578.15000 | 7.30 × 10 <sup>-4</sup> | 1.26265 |
| <b>8d</b> |    | <i>ethyl 2-[(2Z,5Z)-2-({4'-cyano-5'-oxo-1',5'-dihydro-10H-spiro[acridine-9,2'-pyrrol]-1'-yl}imino)-3-(4-fluorophenyl)-4-oxo-1,3-thiazolidin-5-ylidene]acetate</i>  | C <sub>30</sub> H <sub>20</sub> FN <sub>5</sub> O <sub>4</sub> S | 566.12928 | 566.13000 | 7.20 × 10 <sup>-4</sup> | 1.27179 |
| <b>8e</b> |    | <i>ethyl 2-[(2Z,5Z)-2-({4'-cyano-5'-oxo-1',5'-dihydro-10H-spiro[acridine-9,2'-pyrrol]-1'-yl}imino)-3-(4-nitrophenyl)-4-oxo-1,3-thiazolidin-5-ylidene]acetate</i>   | C <sub>30</sub> H <sub>20</sub> N <sub>6</sub> O <sub>6</sub> S  | 593.12378 | 593.12410 | 3.20 × 10 <sup>-4</sup> | 0.53952 |
| <b>9a</b> |   | <i>1'-{[(2Z)-5-methyl-4-oxo-3-phenyl-1,3-thiazolidin-2-ylidene]amino}-5'-oxo-1',5'-dihydro-10H-spiro[acridine-9,2'-pyrrole]-4'-carbonitrile</i>                    | C <sub>27</sub> H <sub>19</sub> N <sub>5</sub> O <sub>2</sub> S  | 478.13322 | 478.13410 | 8.80 × 10 <sup>-4</sup> | 1.84049 |
| <b>9b</b> |  | <i>1'-{[(2Z)-3-(4-methoxyphenyl)-5-methyl-4-oxo-1,3-thiazolidin-2-ylidene]amino}-5'-oxo-1',5'-dihydro-10H-spiro[acridine-9,2'-pyrrole]-4'-carbonitrile</i>         | C <sub>28</sub> H <sub>21</sub> N <sub>5</sub> O <sub>3</sub> S  | 508.14379 | 508.14420 | 4.10 × 10 <sup>-4</sup> | 0.80686 |
| <b>9c</b> |  | <i>1'-{[(2Z)-3-(3-methoxyphenyl)-5-methyl-4-oxo-1,3-thiazolidin-2-ylidene]amino}-5'-oxo-1',5'-dihydro-10H-spiro[acridine-9,2'-pyrrole]-4'-carbonitrile</i>         | C <sub>28</sub> H <sub>21</sub> N <sub>5</sub> O <sub>3</sub> S  | 508.14379 | 508.14450 | 7.10 × 10 <sup>-4</sup> | 1.39724 |

|            |  |                                                                                                                                                            |                                                                  |           |           |                         |         |
|------------|--|------------------------------------------------------------------------------------------------------------------------------------------------------------|------------------------------------------------------------------|-----------|-----------|-------------------------|---------|
| <b>9d</b>  |  | <i>1'-{[(2Z)-3-(4-fluorophenyl)-5-methyl-4-oxo-1,3-thiazolidin-2-ylidene]amino}-5'-oxo-1',5'-dihydro-10H-spiro[acridine-9,2'-pyrrole]-4'-carbonitrile</i>  | C <sub>27</sub> H <sub>18</sub> FN <sub>5</sub> O <sub>2</sub> S | 496.12380 | 496.12470 | 9.00 × 10 <sup>-4</sup> | 1.81406 |
| <b>9e</b>  |  | <i>1'-{[(2Z)-5-methyl-3-(4-nitrophenyl)-4-oxo-1,3-thiazolidin-2-ylidene]amino}-5'-oxo-1',5'-dihydro-10H-spiro[acridine-9,2'-pyrrole]-4'-carbonitrile</i>   | C <sub>27</sub> H <sub>18</sub> N <sub>6</sub> O <sub>4</sub> S  | 523.11830 | 523.11880 | 5.00 × 10 <sup>-4</sup> | 0.95581 |
| <b>10a</b> |  | <i>5'-oxo-1'-{[(2Z)-4-oxo-3-phenyl-5-propyl-1,3-thiazolidin-2-ylidene]amino}-1',5'-dihydro-10H-spiro[acridine-9,2'-pyrrole]-4'-carbonitrile</i>            | C <sub>29</sub> H <sub>23</sub> N <sub>5</sub> O <sub>2</sub> S  | 506.16452 | 506.16510 | 5.80 × 10 <sup>-4</sup> | 1.14587 |
| <b>10b</b> |  | <i>1'-{[(2Z)-3-(4-methoxyphenyl)-4-oxo-5-propyl-1,3-thiazolidin-2-ylidene]amino}-5'-oxo-1',5'-dihydro-10H-spiro[acridine-9,2'-pyrrole]-4'-carbonitrile</i> | C <sub>30</sub> H <sub>25</sub> N <sub>5</sub> O <sub>3</sub> S  | 536.17509 | 536.17560 | 5.10 × 10 <sup>-4</sup> | 0.95118 |
| <b>10c</b> |  | <i>1'-{[(2Z)-3-(3-methoxyphenyl)-4-oxo-5-propyl-1,3-thiazolidin-2-ylidene]amino}-5'-oxo-1',5'-dihydro-10H-spiro[acridine-9,2'-pyrrole]-4'-carbonitrile</i> | C <sub>30</sub> H <sub>25</sub> N <sub>5</sub> O <sub>3</sub> S  | 536.17509 | 536.17570 | 6.10 × 10 <sup>-4</sup> | 1.13769 |
| <b>10d</b> |  | <i>1'-{[(2Z)-3-(4-fluorophenyl)-4-oxo-5-propyl-1,3-thiazolidin-2-ylidene]amino}-5'-oxo-1',5'-dihydro-10H-spiro[acridine-9,2'-pyrrole]-4'-carbonitrile</i>  | C <sub>29</sub> H <sub>22</sub> FN <sub>5</sub> O <sub>2</sub> S | 524.15510 | 524.15610 | 1.00 × 10 <sup>-4</sup> | 1.90783 |
| <b>10e</b> |  | <i>1'-{[(2Z)-3-(4-nitrophenyl)-4-oxo-5-propyl-1,3-thiazolidin-2-ylidene]amino}-5'-oxo-1',5'-dihydro-10H-spiro[acridine-9,2'-pyrrole]-4'-carbonitrile</i>   | C <sub>29</sub> H <sub>22</sub> N <sub>6</sub> O <sub>4</sub> S  | 551.14960 | 551.15050 | 9.00 × 10 <sup>-4</sup> | 1.63295 |

## 2 NMR, IR and MS spectra of synthesized derivatives

### 2.1 3-{4'-Cyano-5'-oxo-1',5'-dihydro-10*H*-spiro[acridine-9,2'-pyrrol]-1'-yl}-1-phenylthiourea (**6a**)

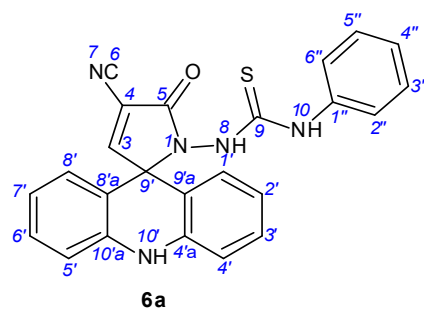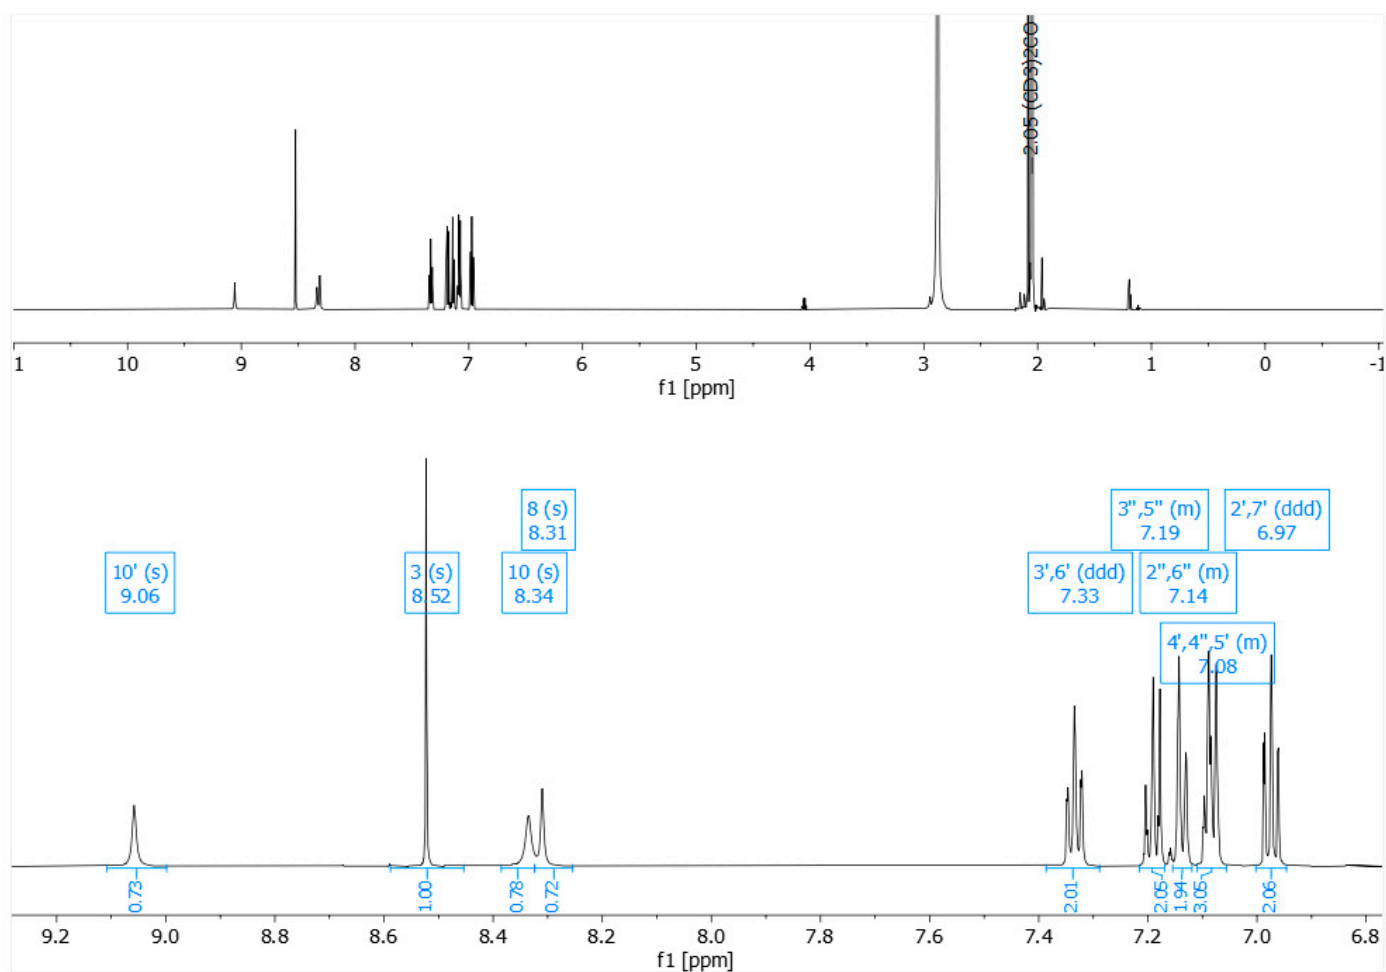

<sup>1</sup>H NMR (600 MHz, acetone-d<sub>6</sub>) spectrum of derivative **6a**.

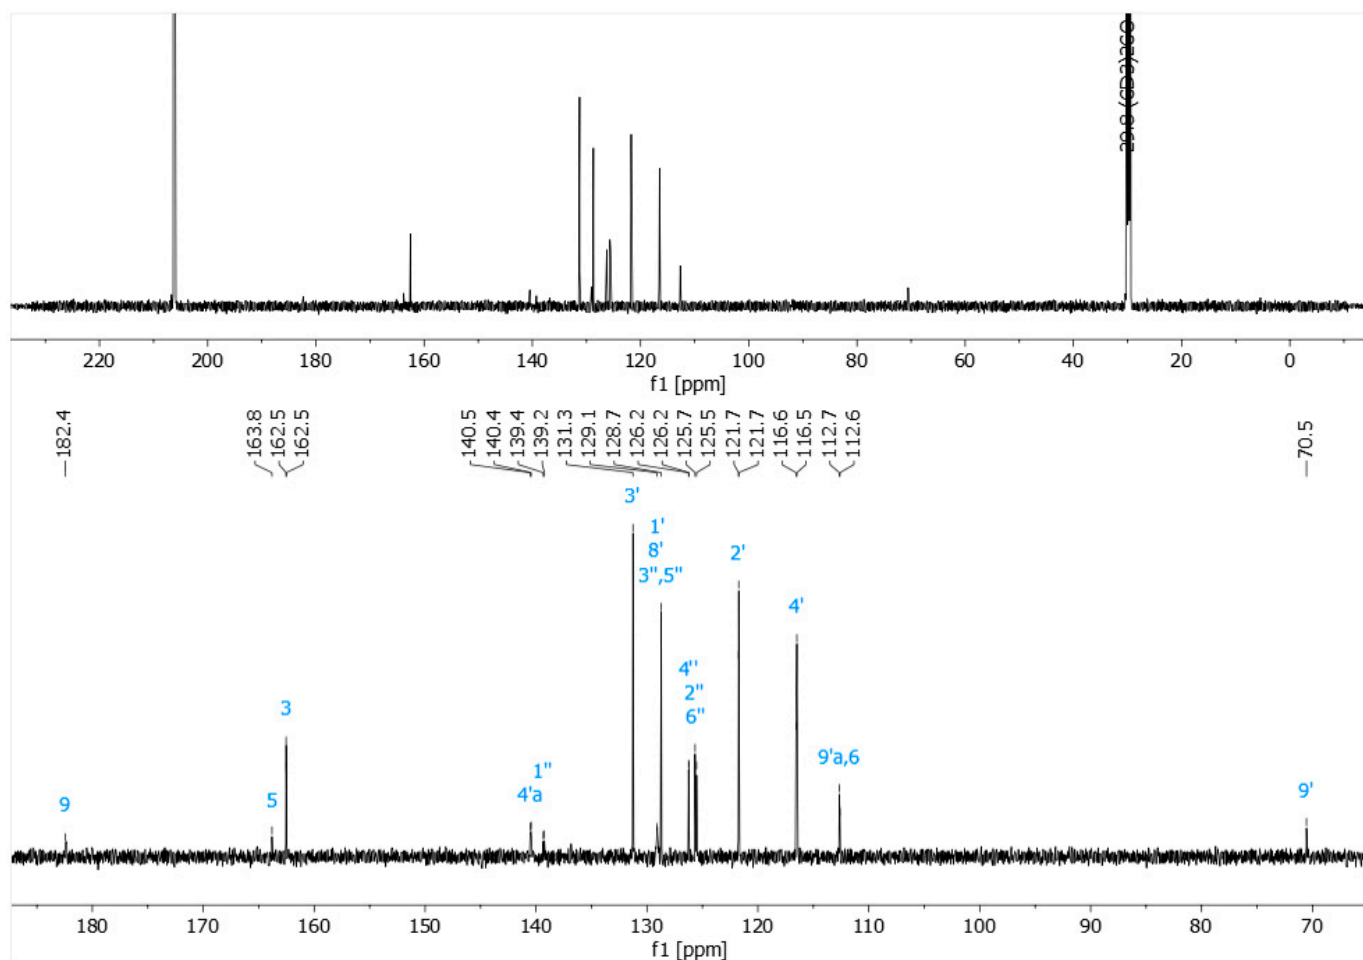

<sup>13</sup>C NMR (150 MHz, acetone-d<sub>6</sub>) spectrum of derivative **6a**.

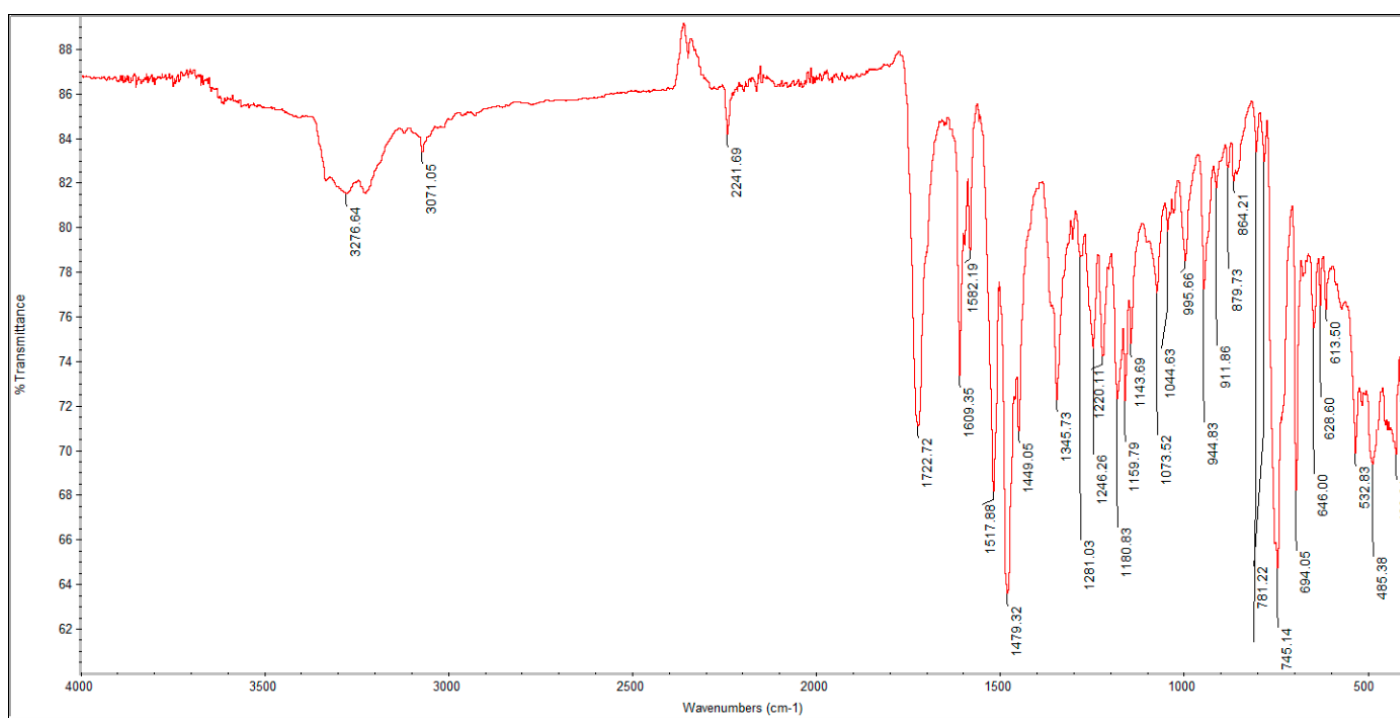

FTIR spectrum of derivative **6a**.

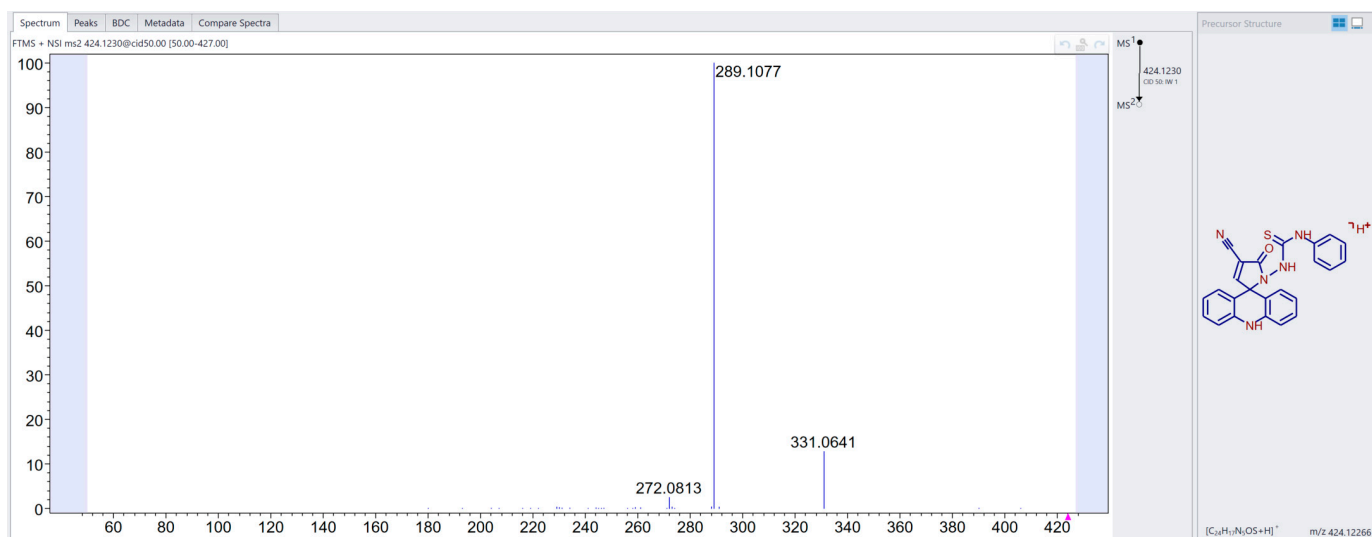

MS2 spectrum of derivative **6a**.

2.2 3-{4'-Cyano-5'-oxo-1',5'-dihydro-10H-spiro[acridine-9,2'-pyrrol]-1'-yl}-1-(4-methoxyphenyl)thiourea (6b)

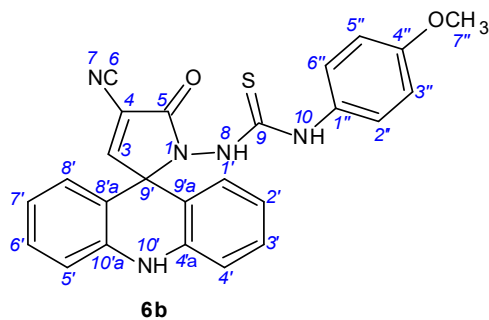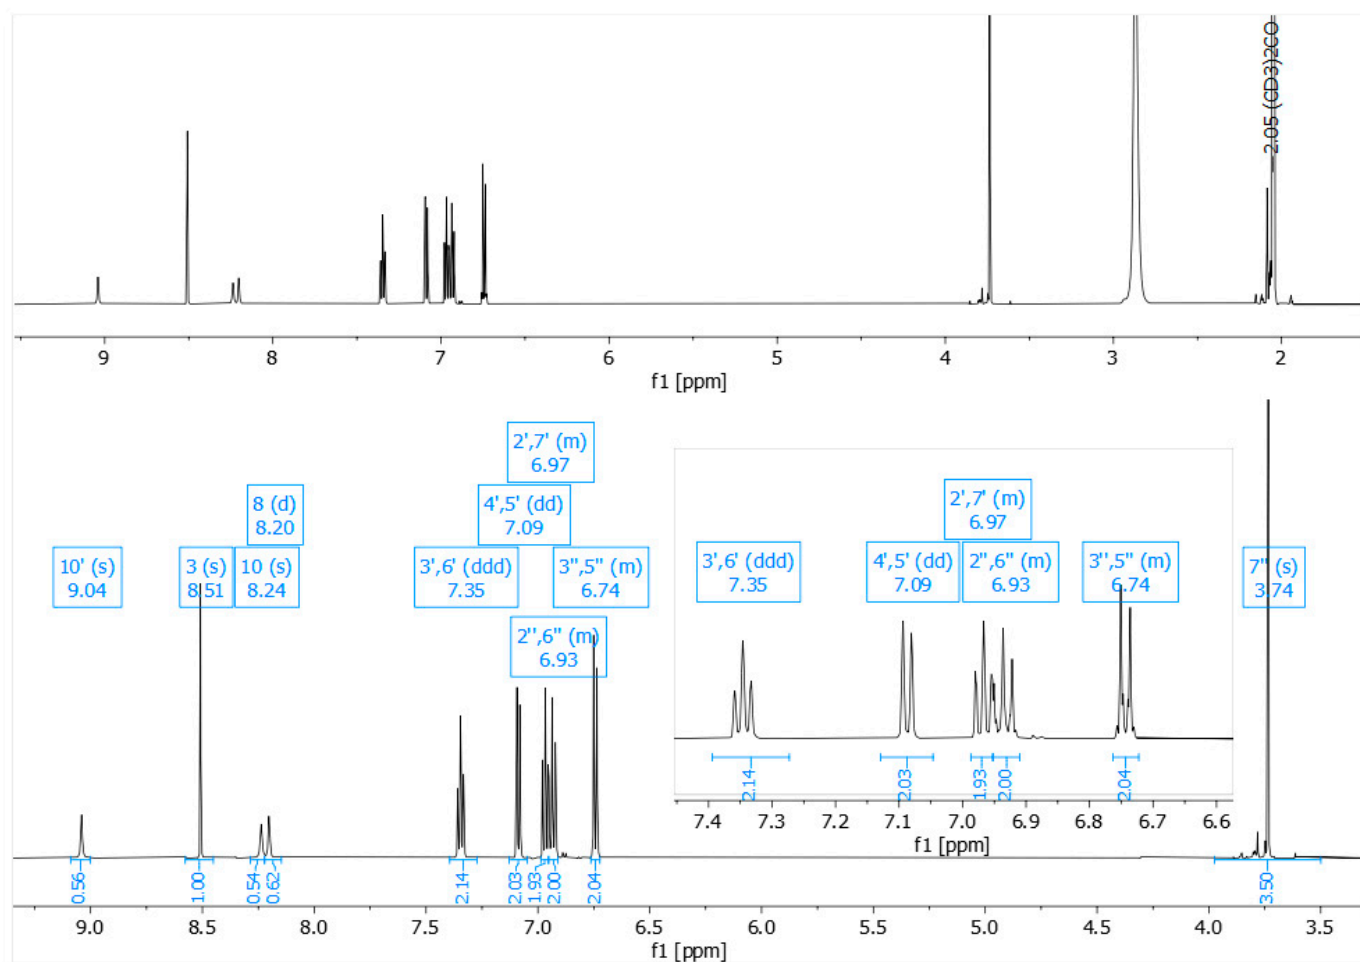

<sup>1</sup>H NMR (600 MHz, acetone-d<sub>6</sub>) spectrum of derivative **6b**.



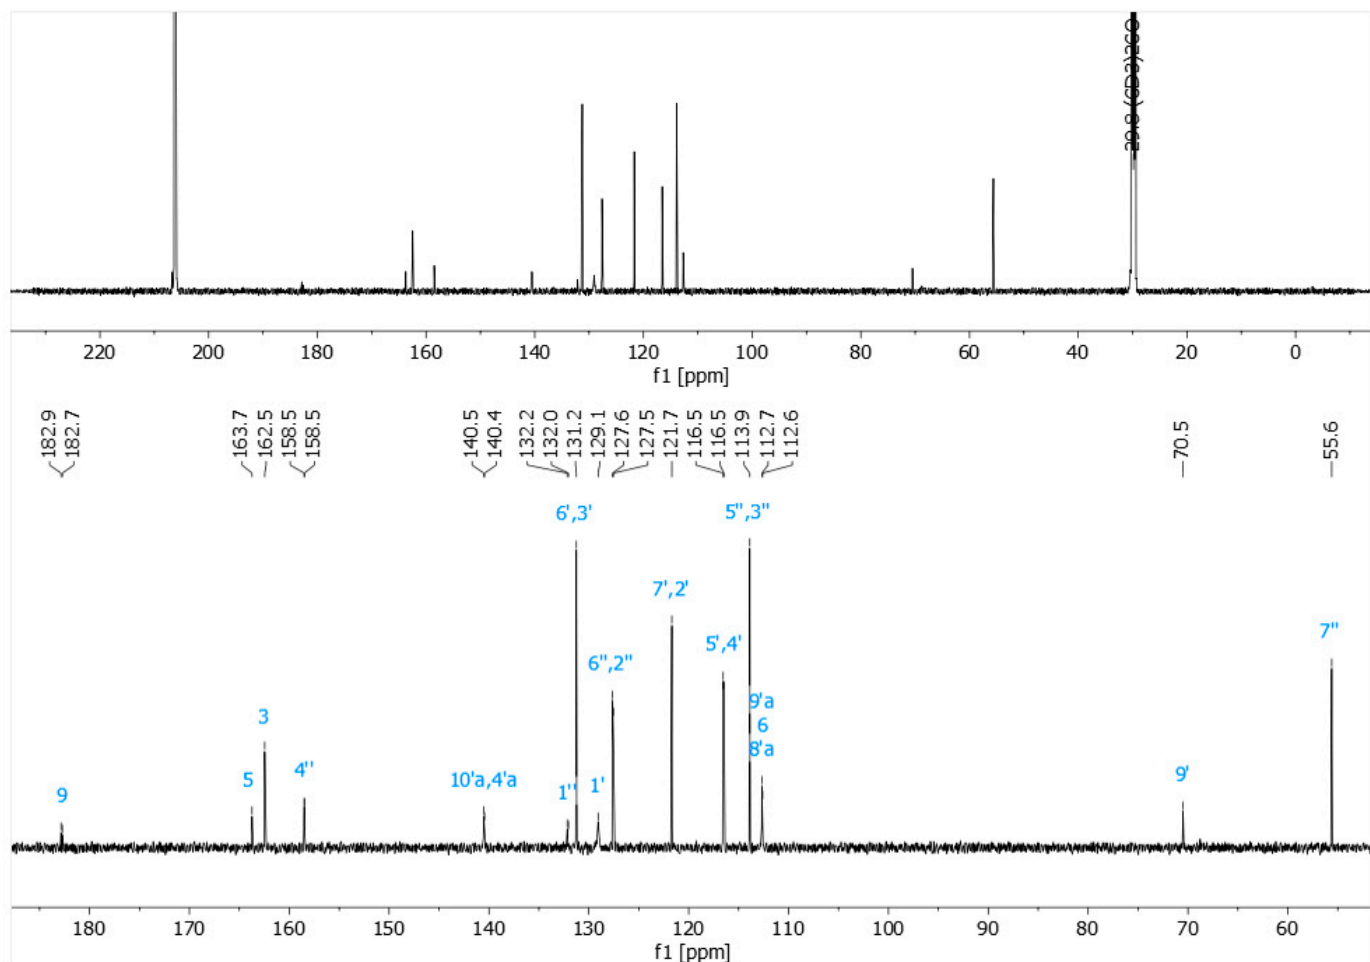

<sup>13</sup>C NMR (150 MHz, acetone-d<sub>6</sub>) spectrum of derivative **6b**.

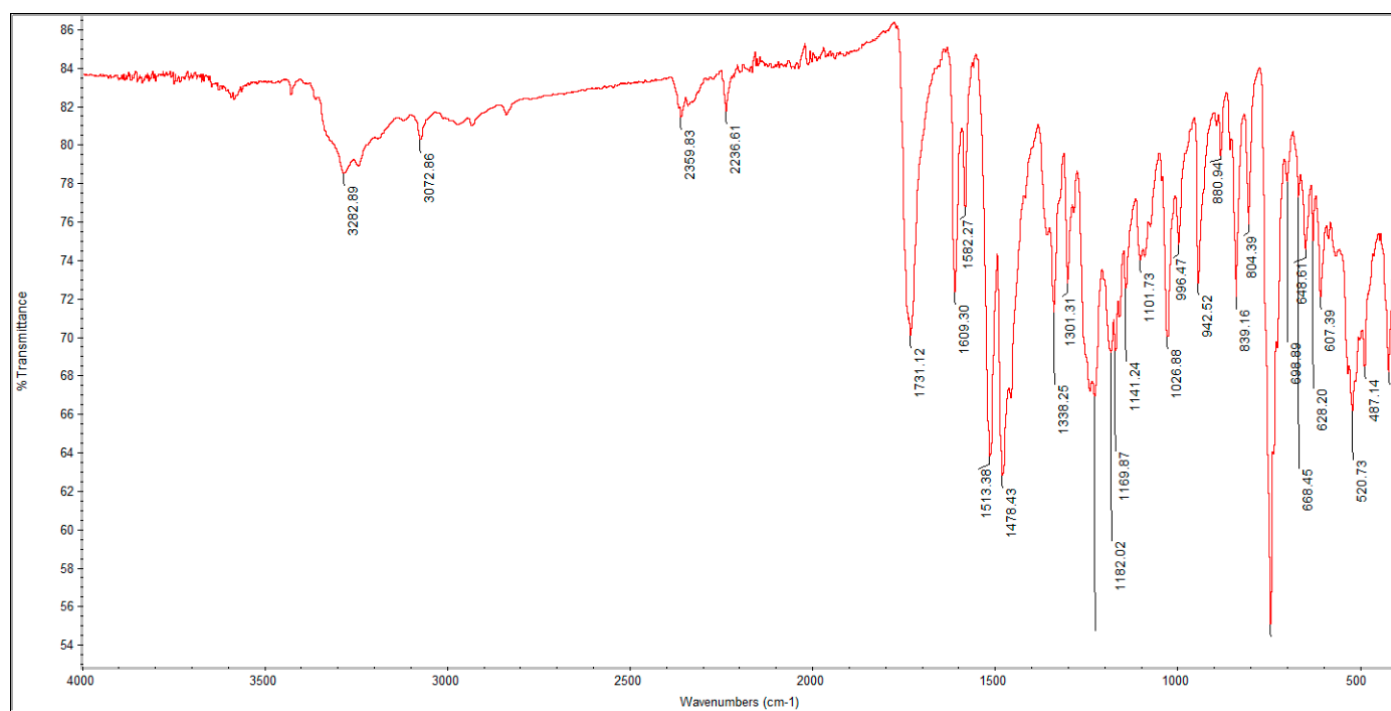

FTIR spectrum of derivative **6b**.

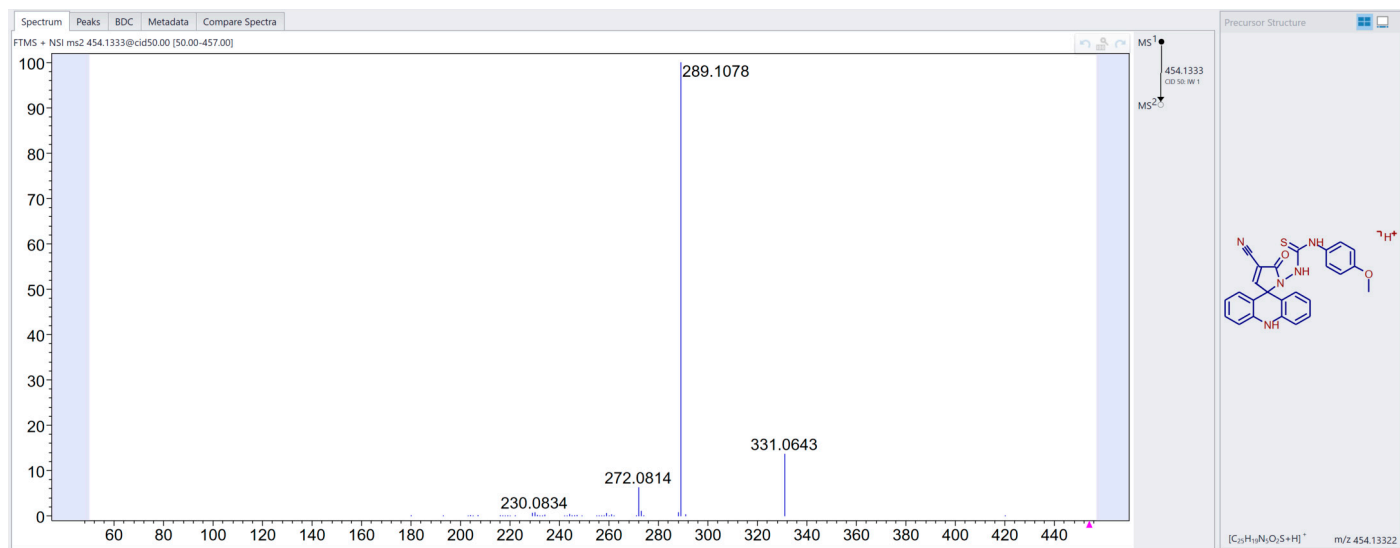

MS2 spectrum of derivative **6b**.

2.3 3-{4'-Cyano-5'-oxo-1',5'-dihydro-10H-spiro[acridine-9,2'-pyrrol]-1'-yl}-1-(3-methoxyphenyl)thiourea (6c)

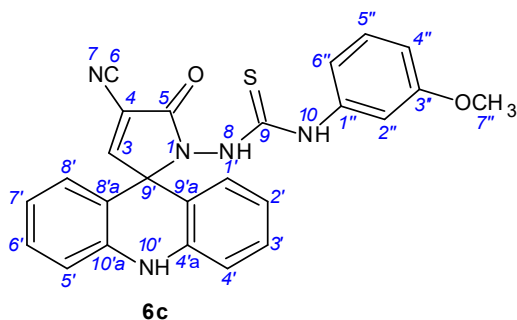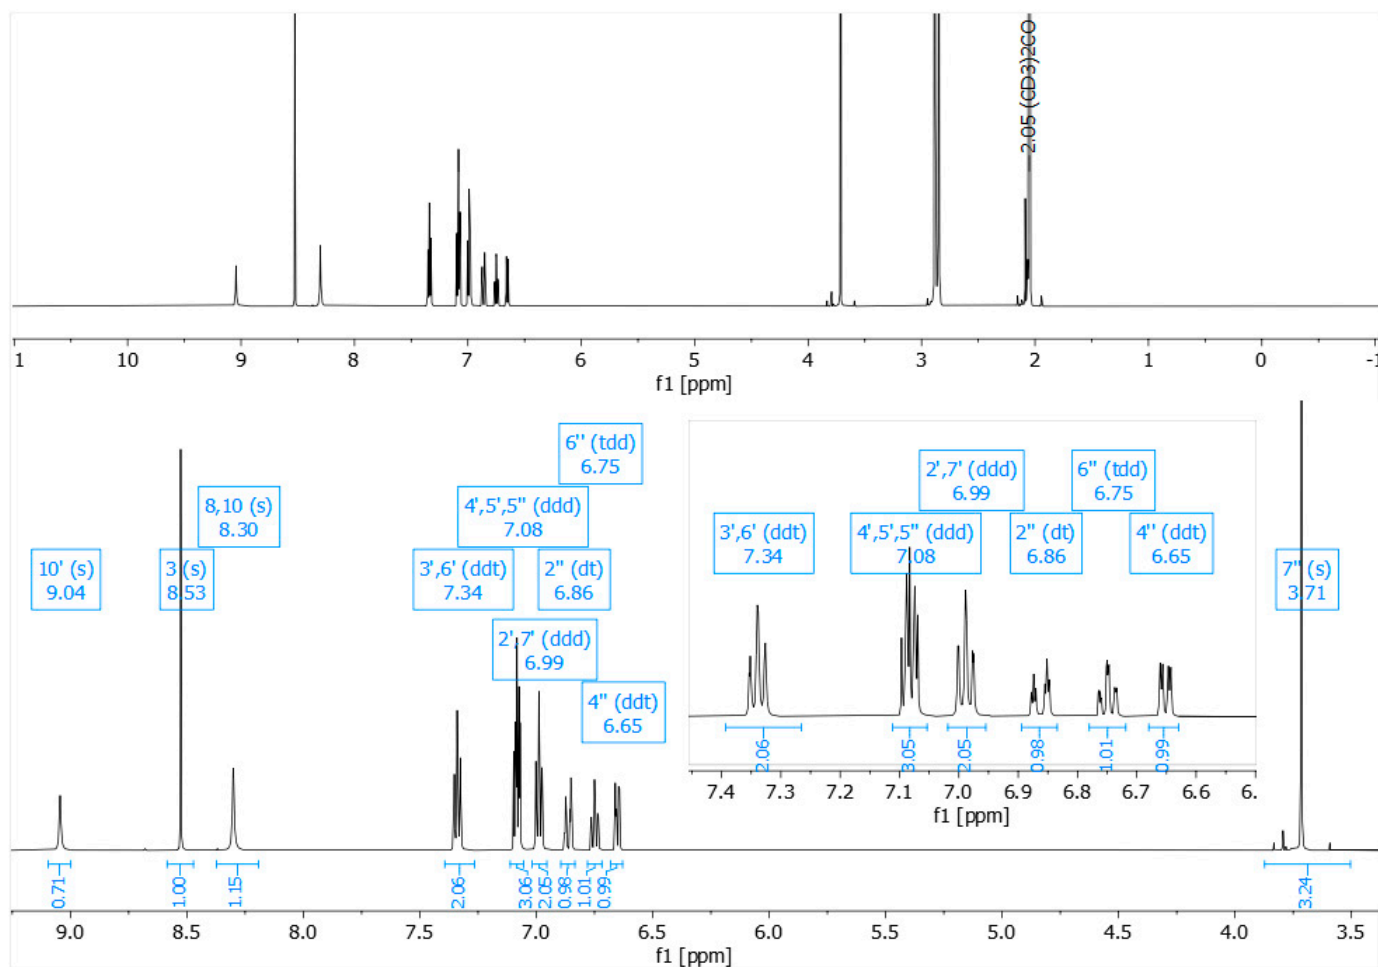

<sup>1</sup>H NMR (600 MHz, acetone-d<sub>6</sub>) spectrum of derivative **6c**.

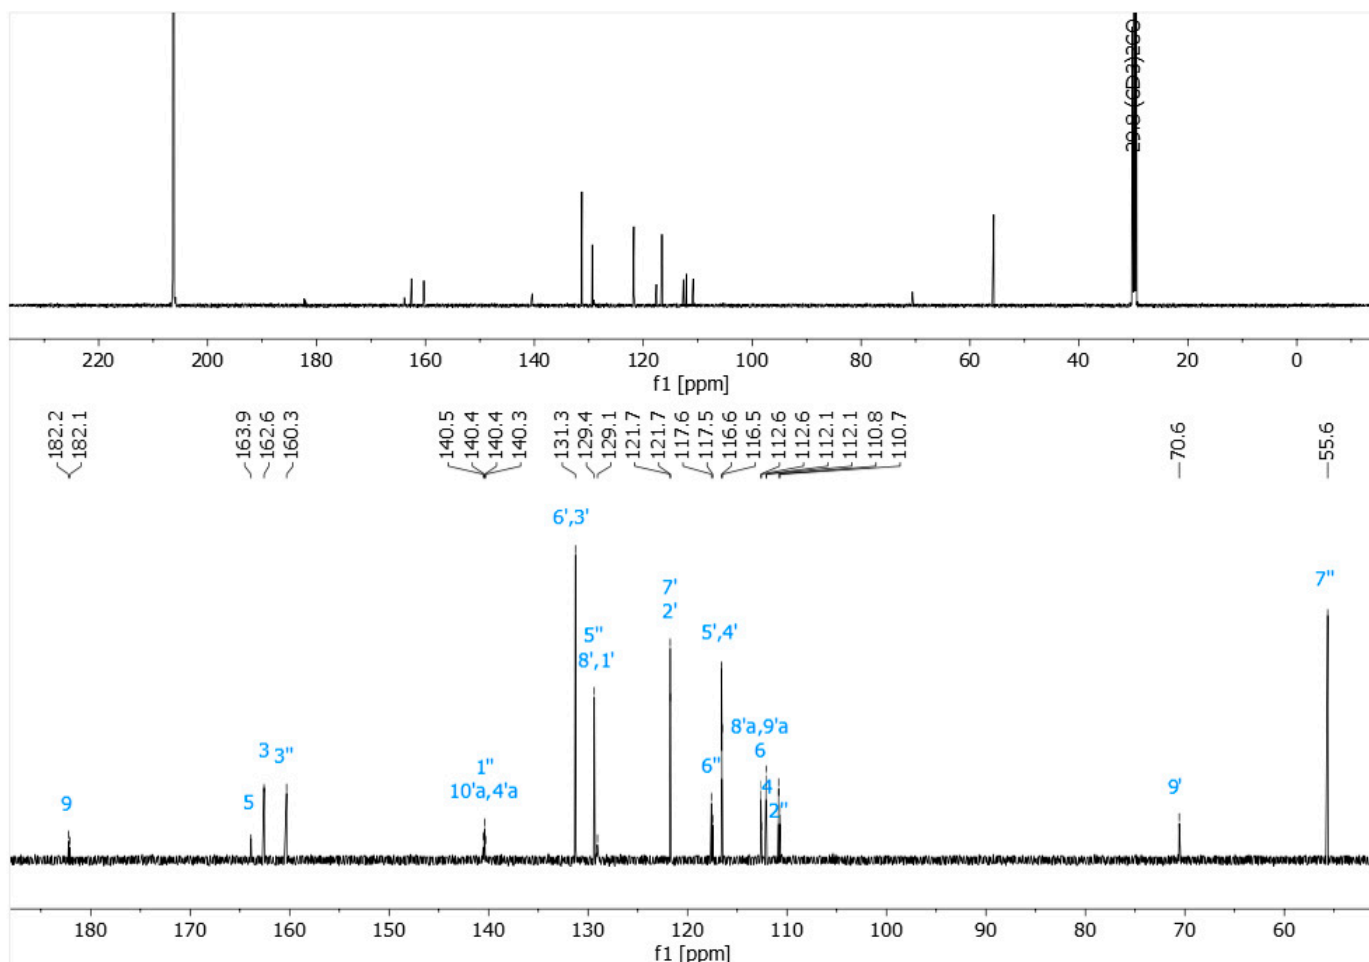

<sup>13</sup>C NMR (150 MHz, acetone-d<sub>6</sub>) spectrum of derivative **6c**.

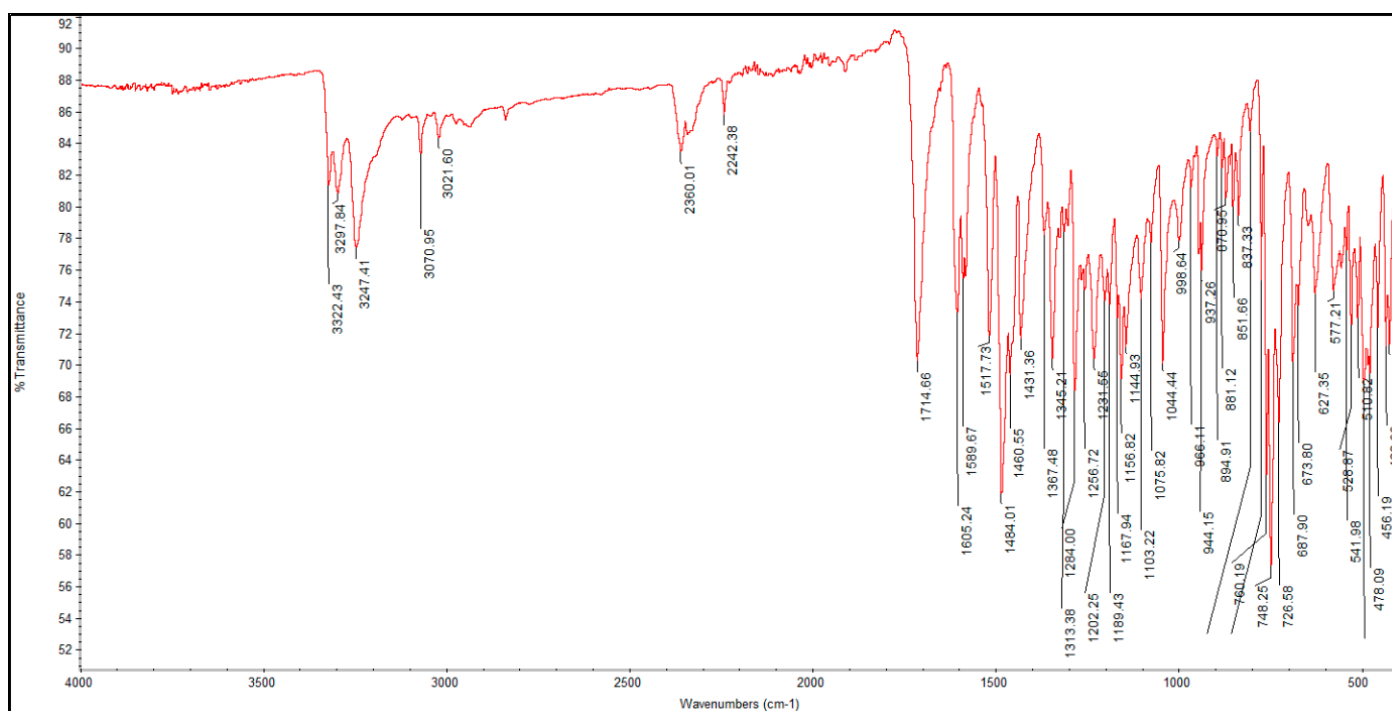

FTIR spectrum of derivative **6c**.

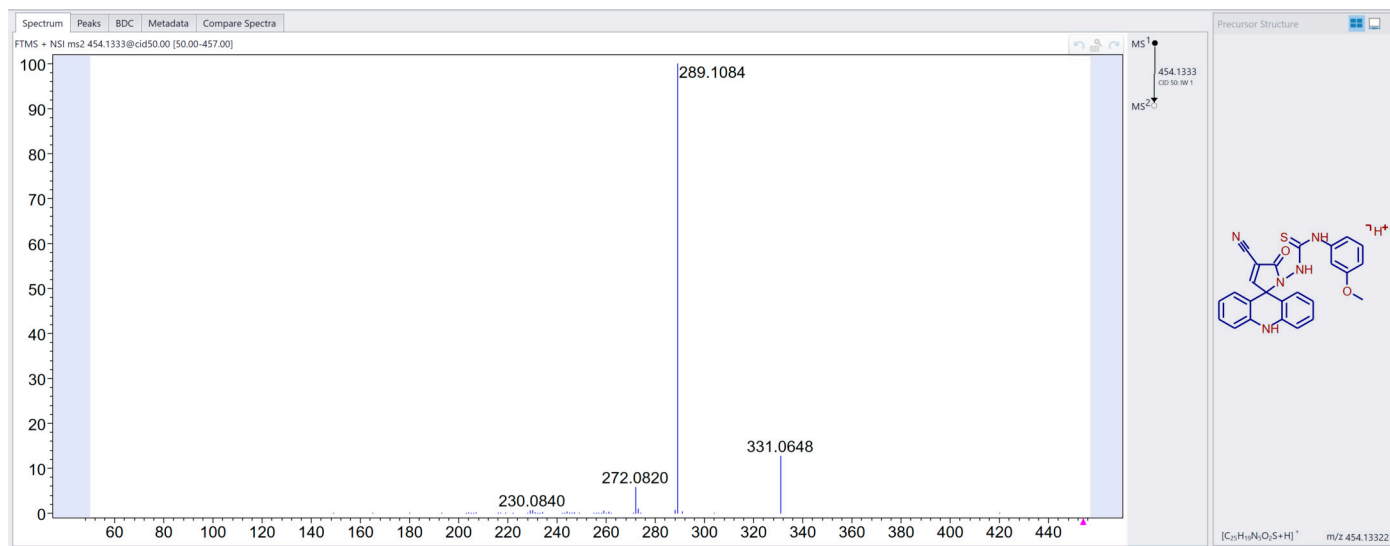

MS2 spectrum of derivative **6c**.

2.4 3-{4'-Cyano-5'-oxo-1',5'-dihydro-10*H*-spiro[acridine-9,2'-pyrrol]-1'-yl}-1-(4-fluorophenyl)thiourea (**6d**)

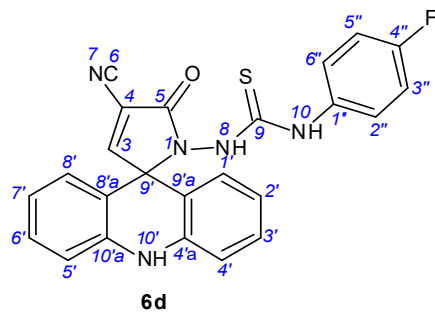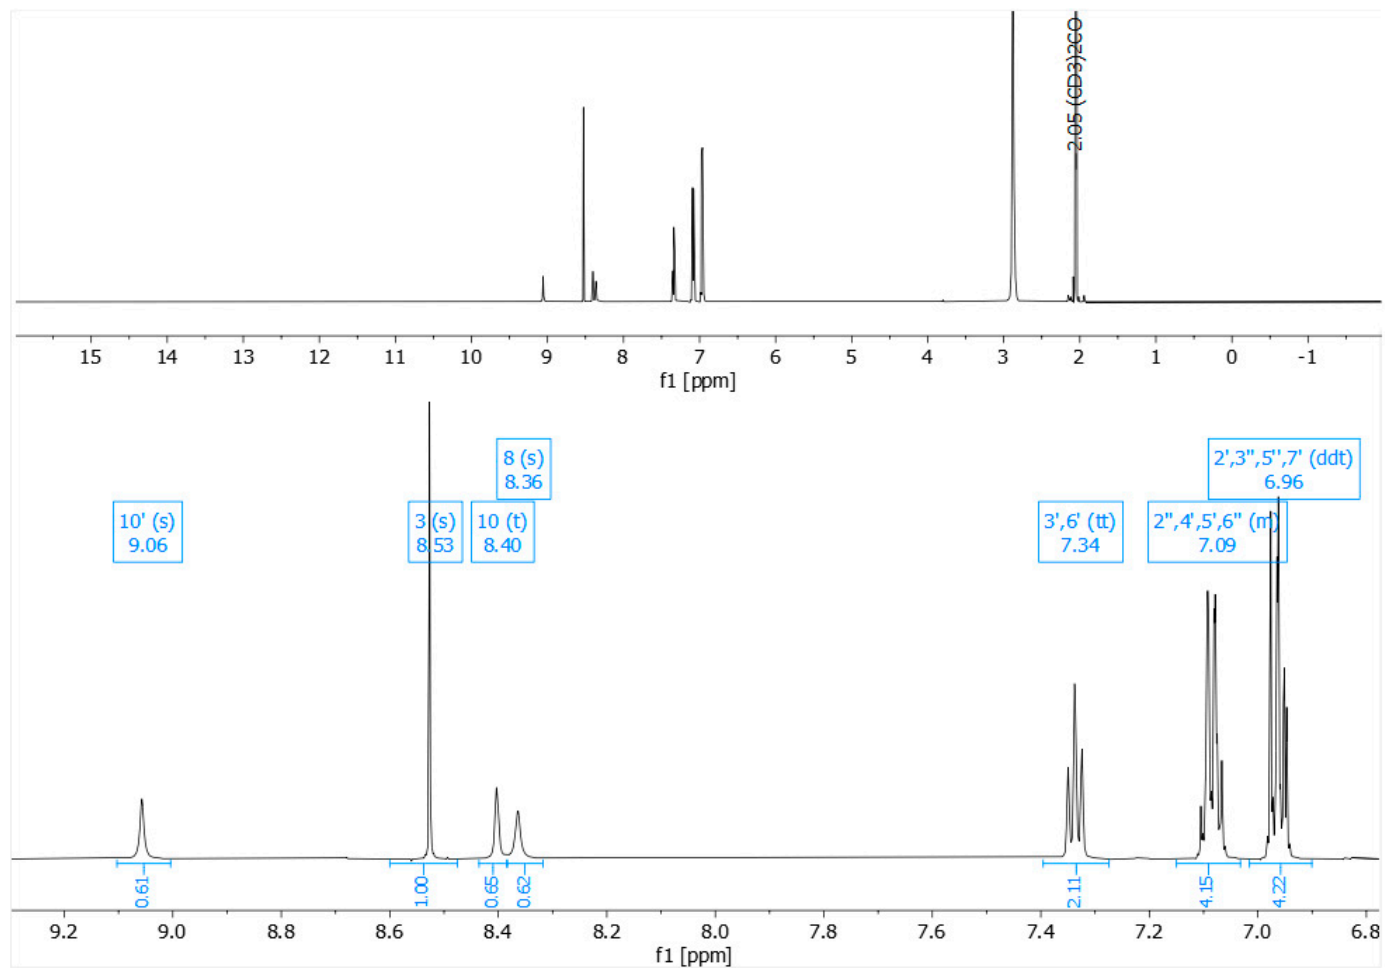

<sup>1</sup>H NMR (600 MHz, acetone-d<sub>6</sub>) spectrum of derivative **6d**.

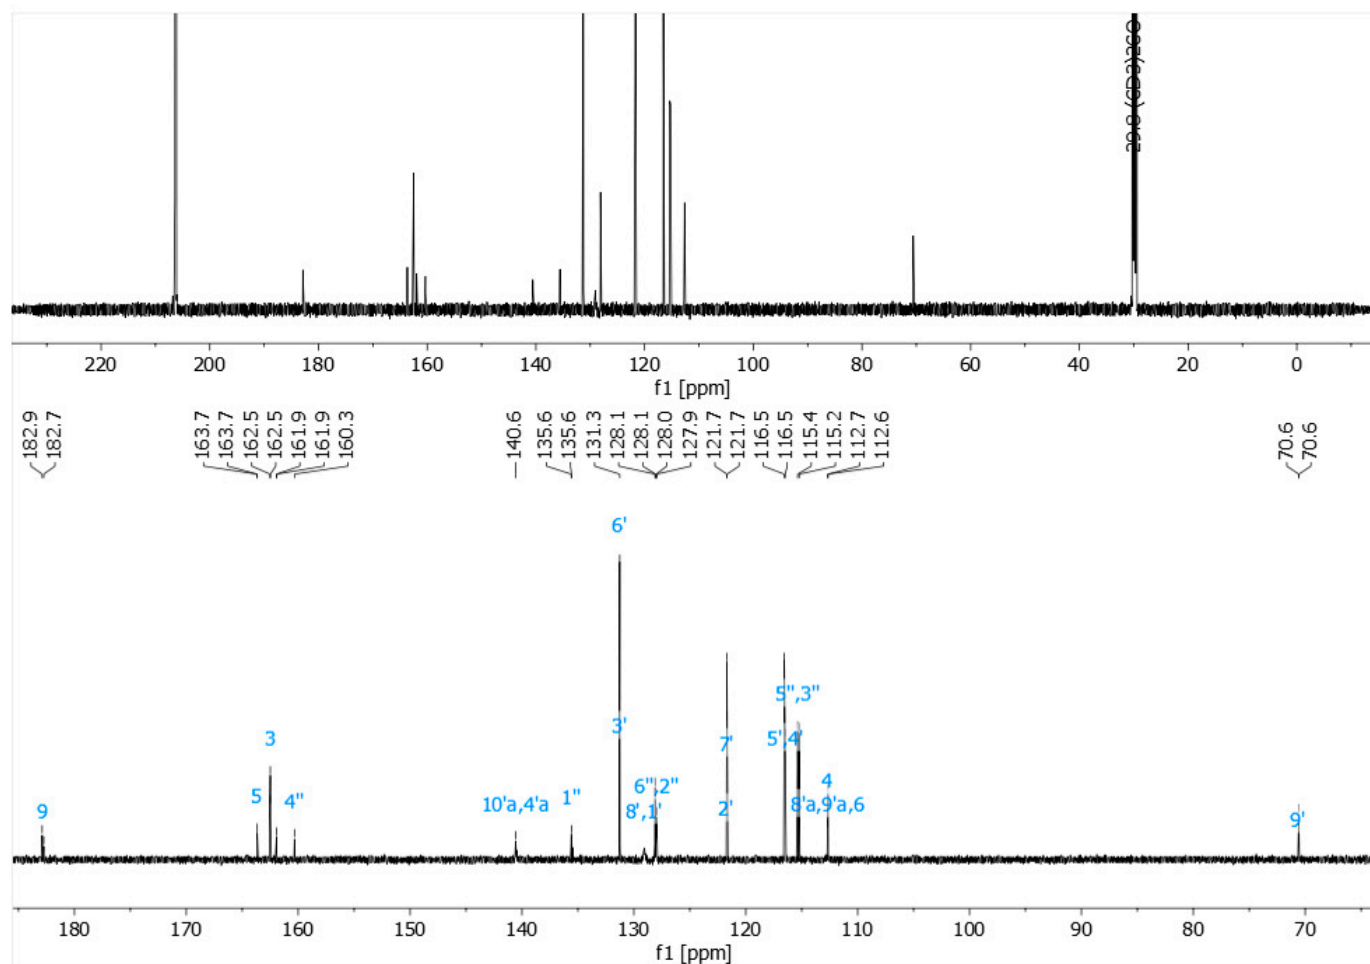

<sup>13</sup>C NMR (150 MHz, acetone-d<sub>6</sub>) spectrum of derivative **6d**.

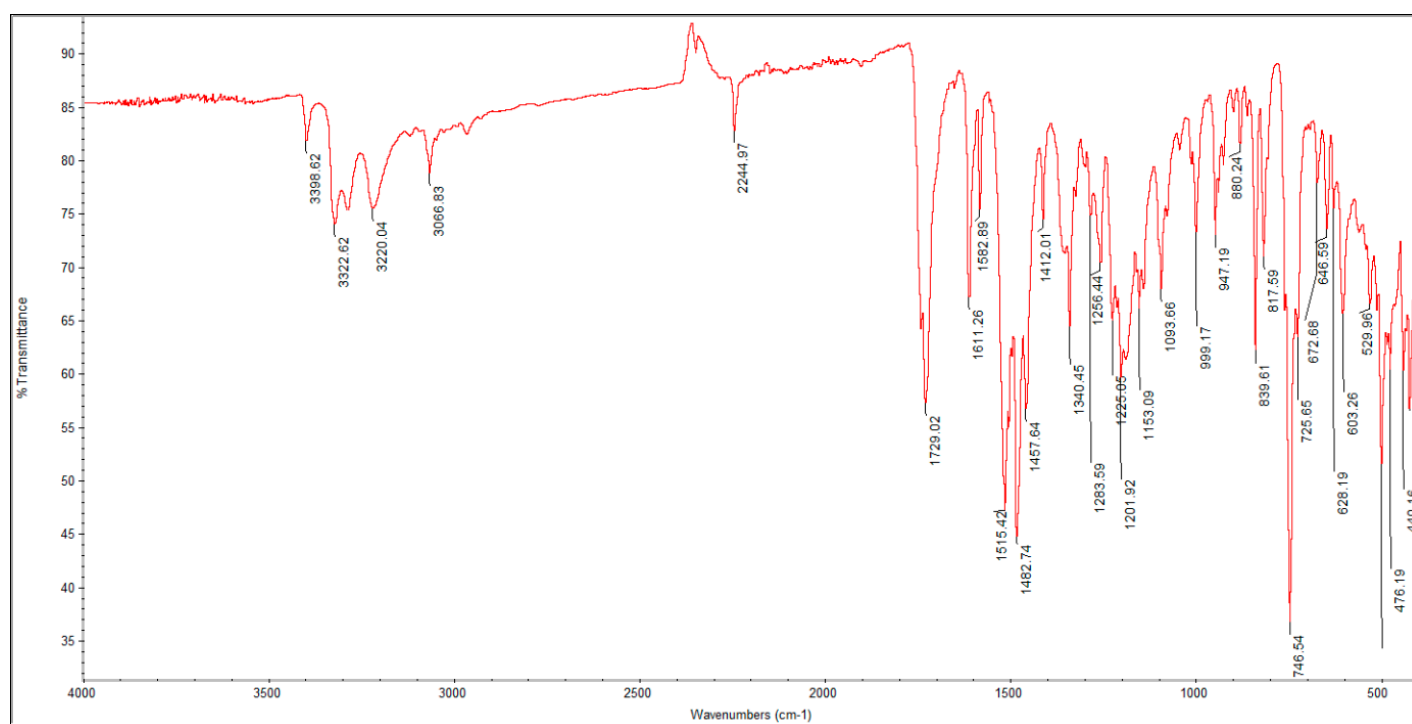

FTIR spectrum of derivative **6d**.

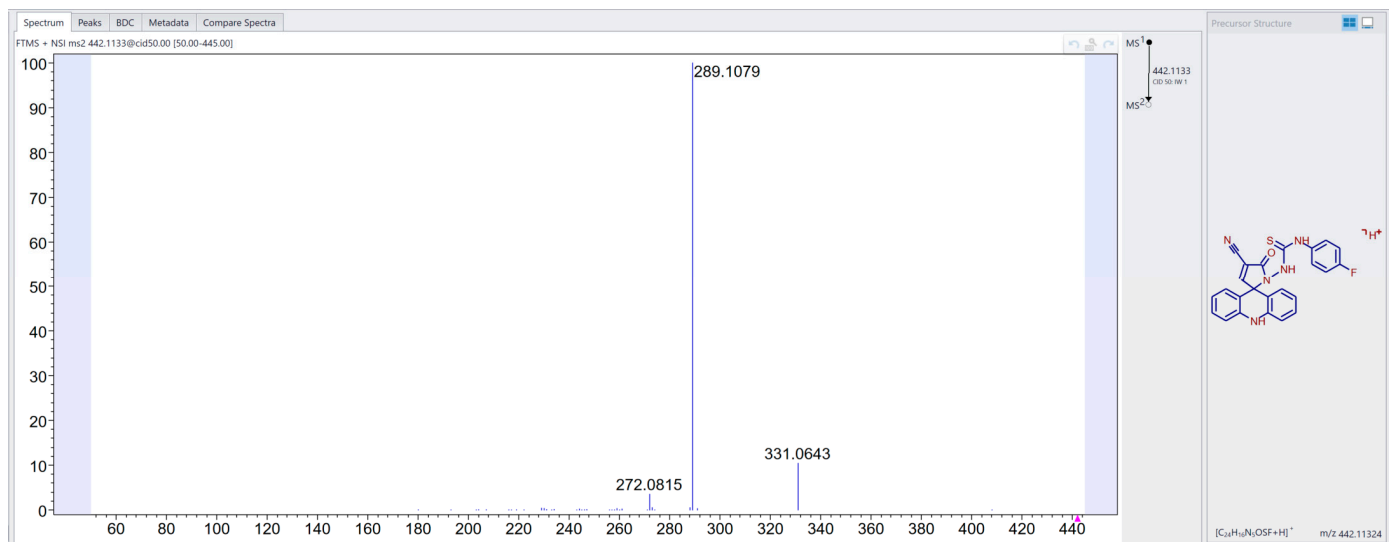

MS2 spectrum of derivative **6d**.



2.5 3-{4'-Cyano-5'-oxo-1',5'-dihydro-10*H*-spiro[acridine-9,2'-pyrrol]-1'-yl}-1-(4-nitrophenyl)thiourea (**6e**)

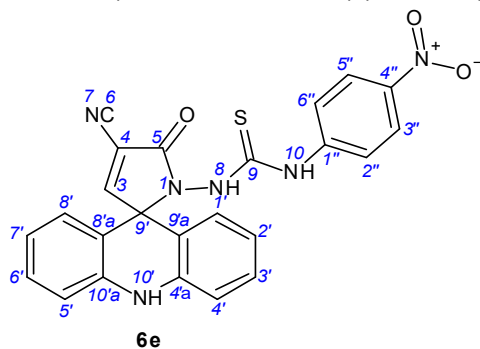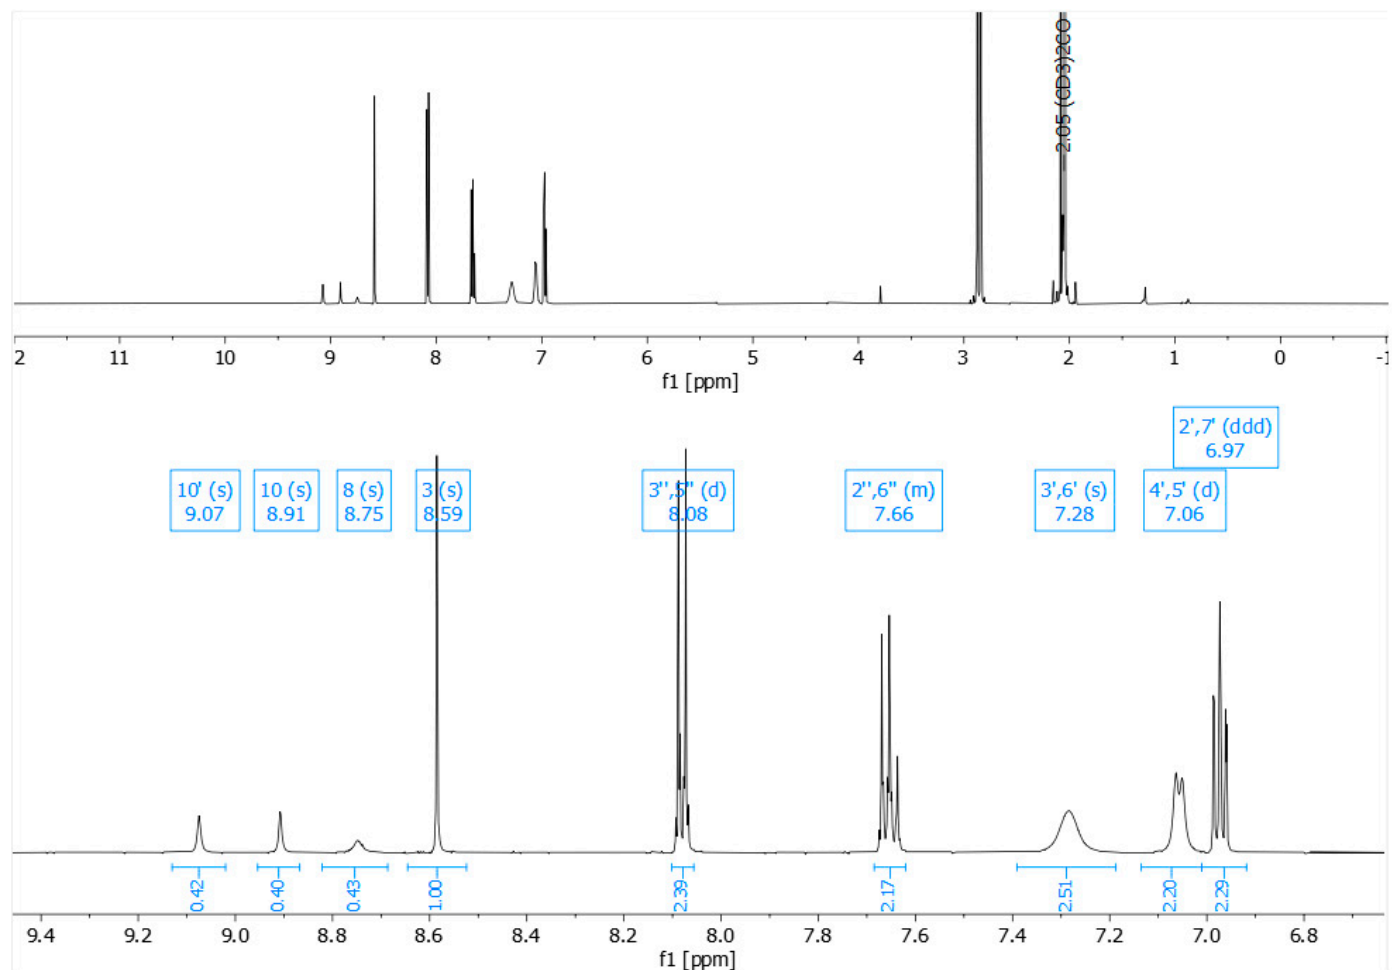

<sup>1</sup>H NMR (600 MHz, acetone-d<sub>6</sub>) spectrum of derivative **6e**.

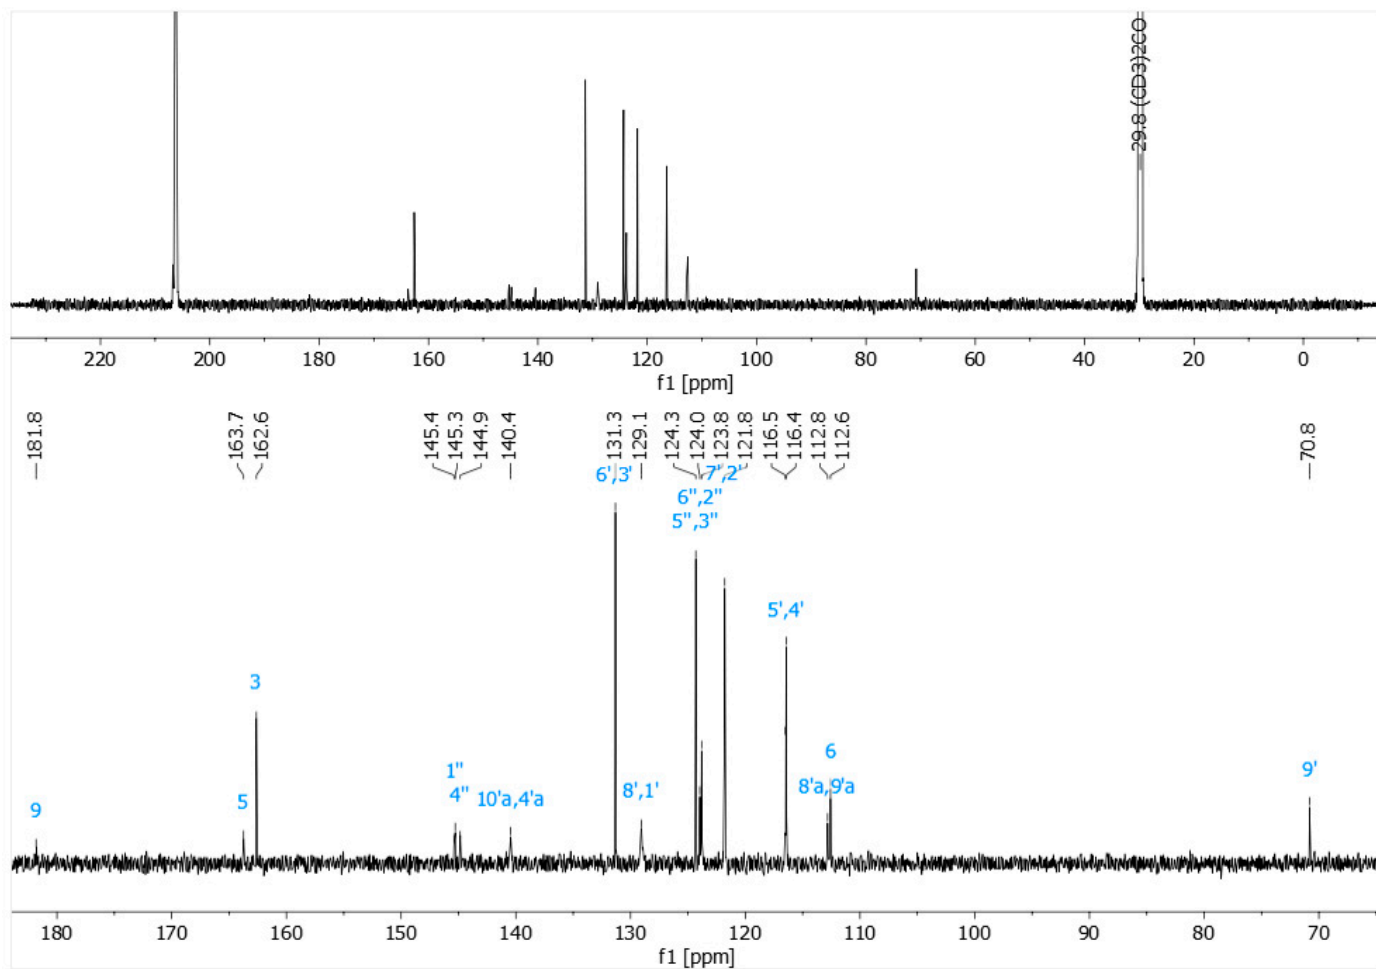

<sup>13</sup>C NMR (150 MHz, acetone-d<sub>6</sub>) spectrum of derivative **6e**.

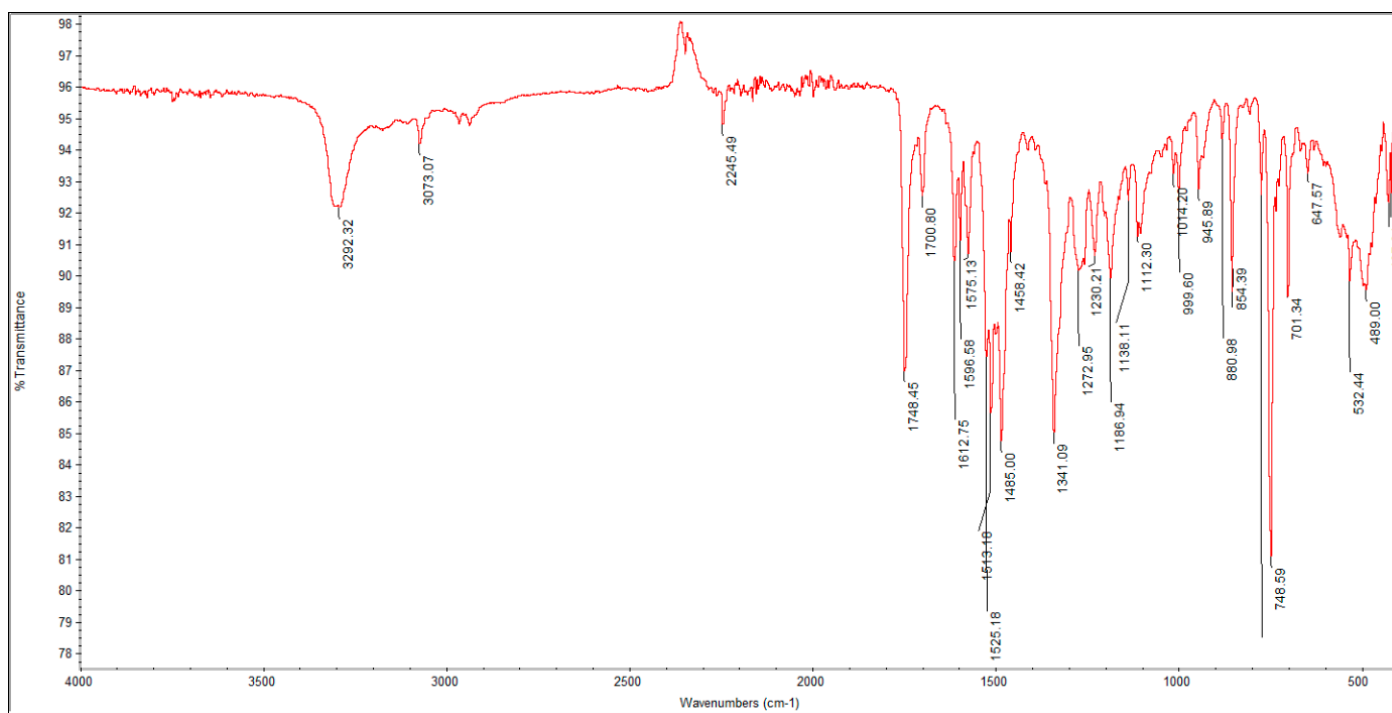

FTIR spectrum of derivative **6e**.

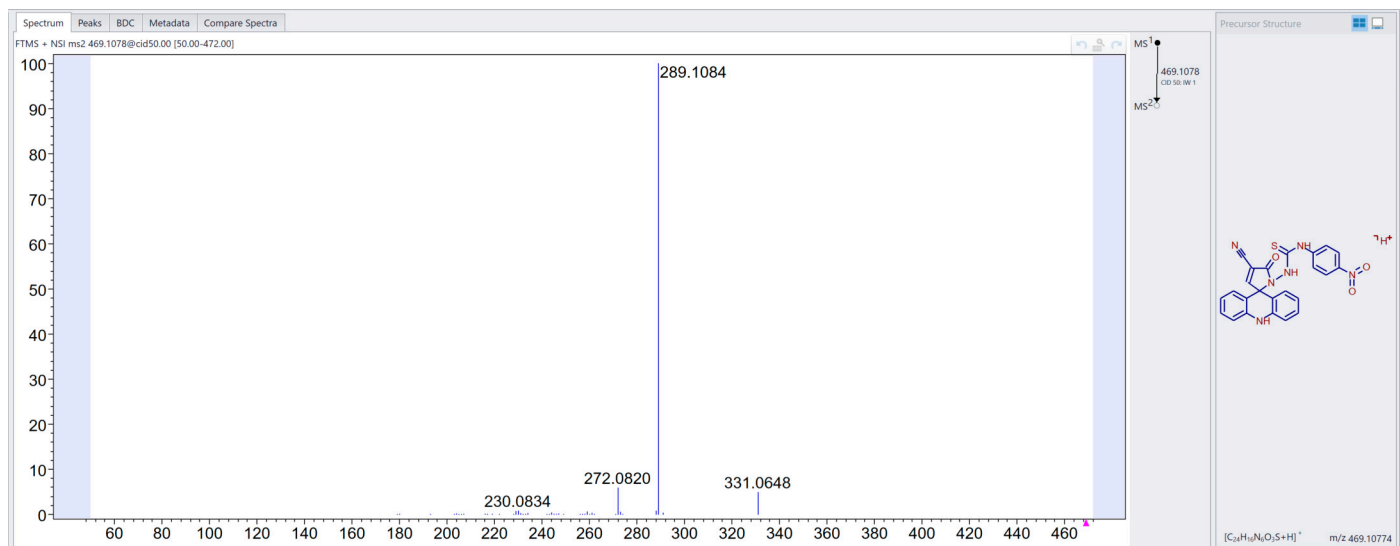

MS2 spectrum of derivative **6e**.

2.6 5'-Oxo-1'-{[(2Z)-4-oxo-3-phenyl-1,3-thiazolidin-2-ylidene]amino}-1',5'-dihydro-10*H*-spiro[acridine-9,2'-pyrrole]-4'-carbonitrile (**7a**)

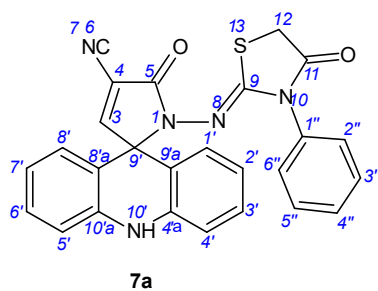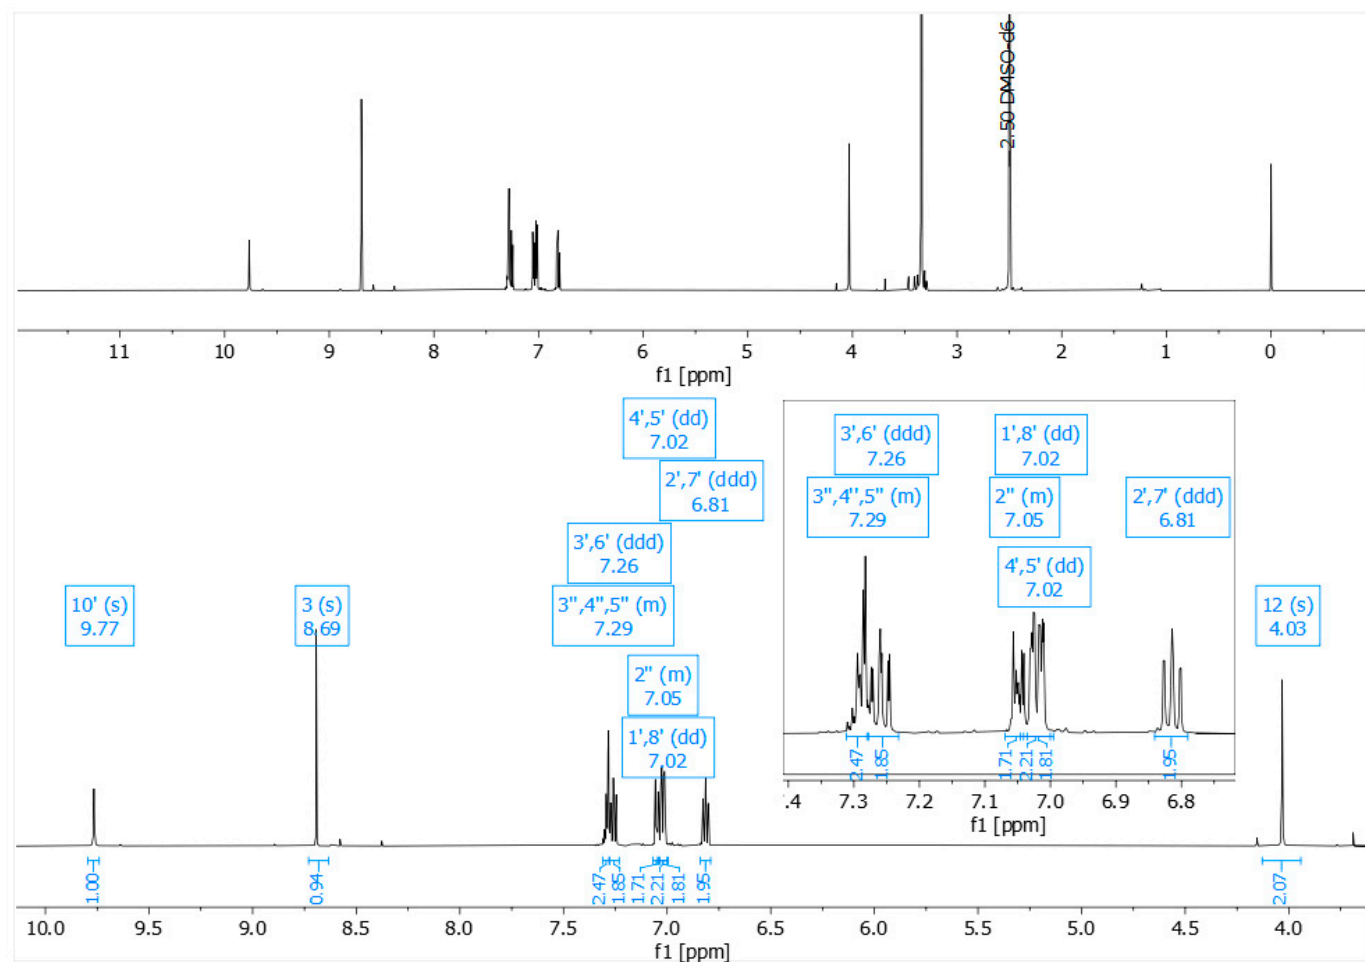

<sup>1</sup>H NMR (600 MHz, DMSO-d<sub>6</sub>) spectrum of derivative **7a**.

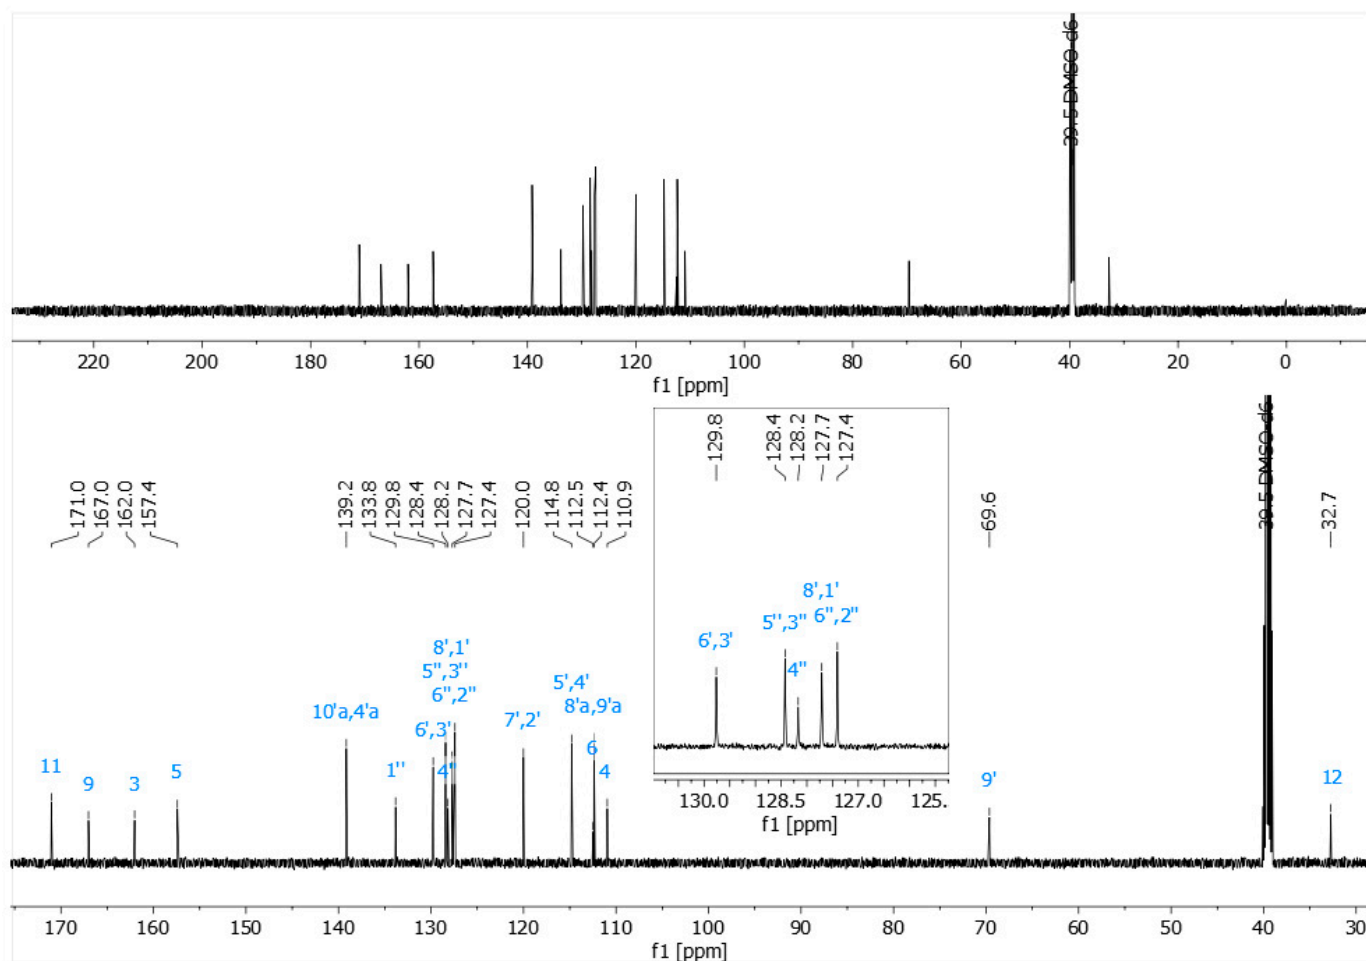

<sup>13</sup>C NMR (150 MHz, DMSO-d<sub>6</sub>) spectrum of derivative **7a**.

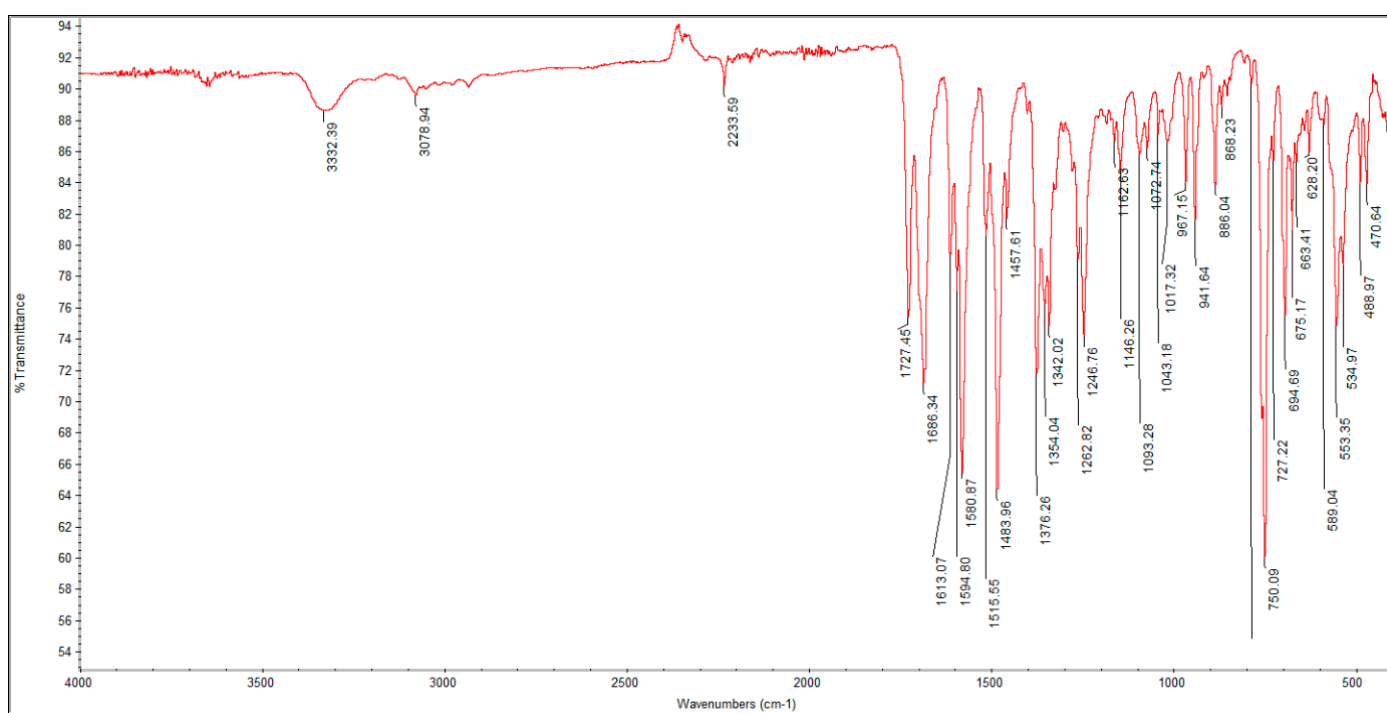

FTIR spectrum of derivative **7a**.

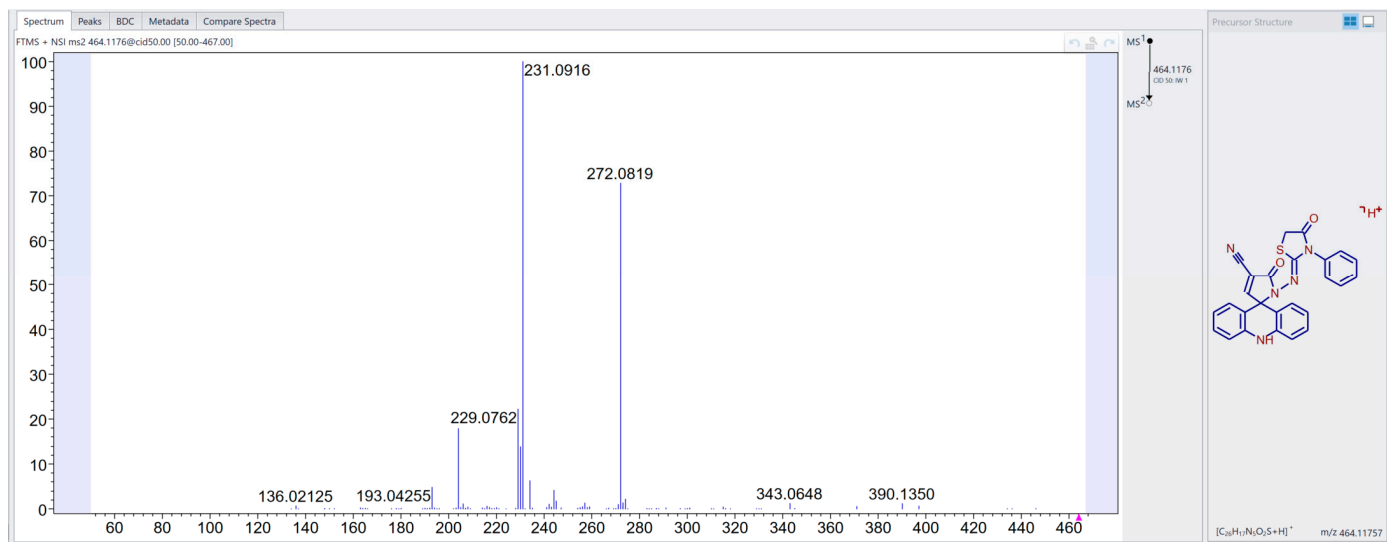

MS2 spectrum of derivative **7a**.

2.7 1'--{[(2Z)-3-(4-Methoxyphenyl)-4-oxo-1,3-thiazolidin-2-ylidene]amino}-5'-oxo-1',5'-dihydro-10H-spiro[acridine-9,2'-pyrrole]-4'-carbonitrile (**7b**)

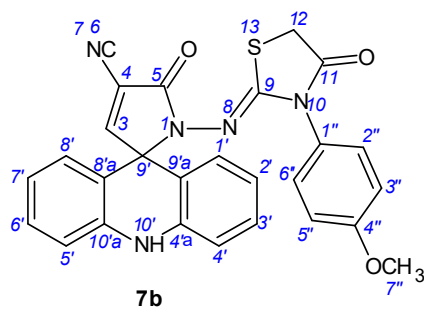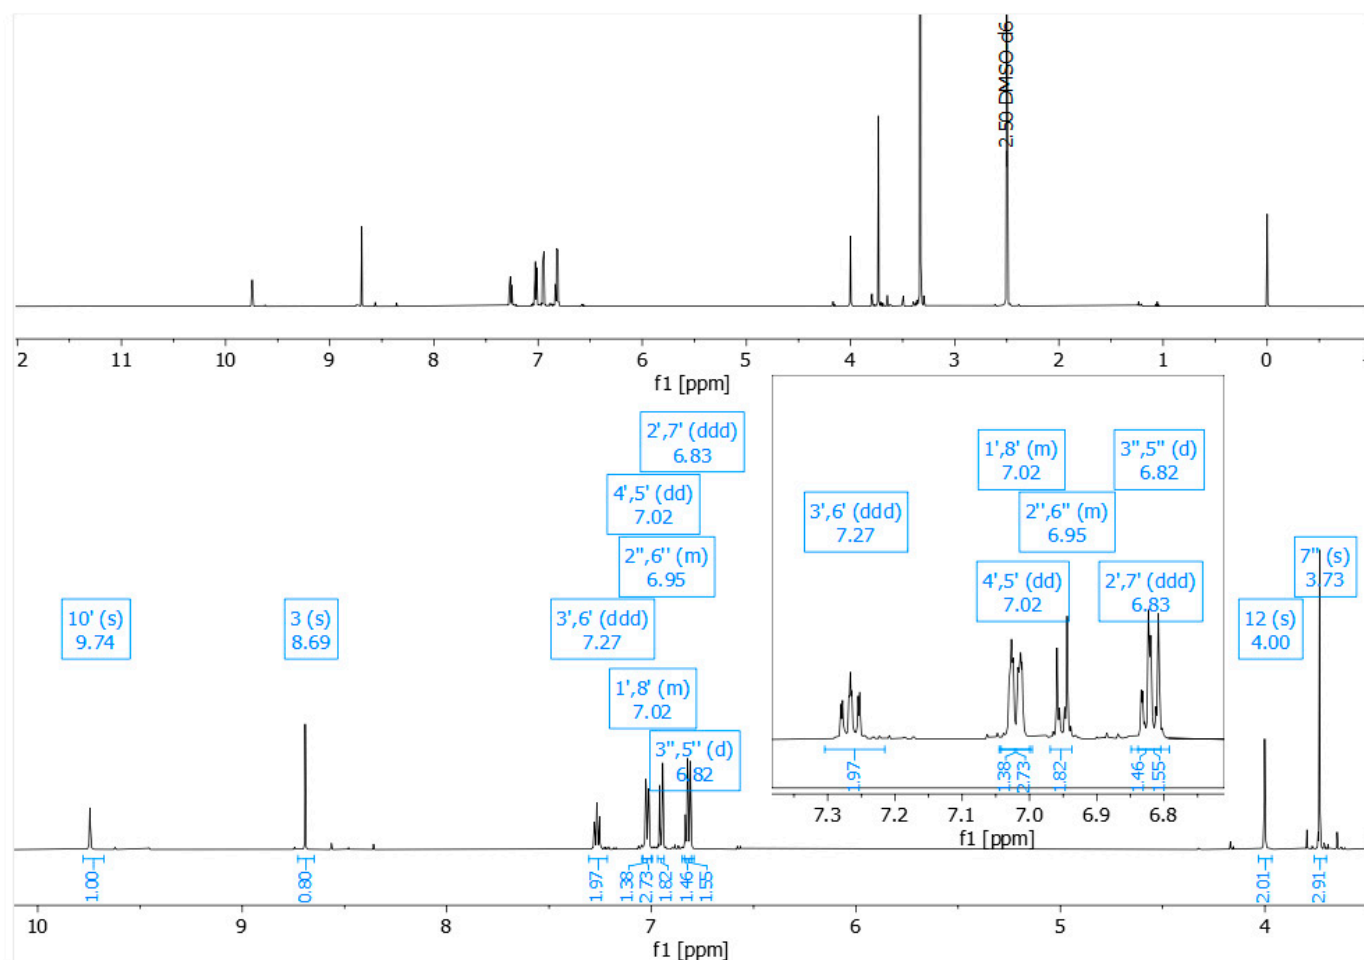

$^1\text{H}$  NMR (600 MHz, DMSO- $\text{d}_6$ ) spectrum of derivative **7b**.

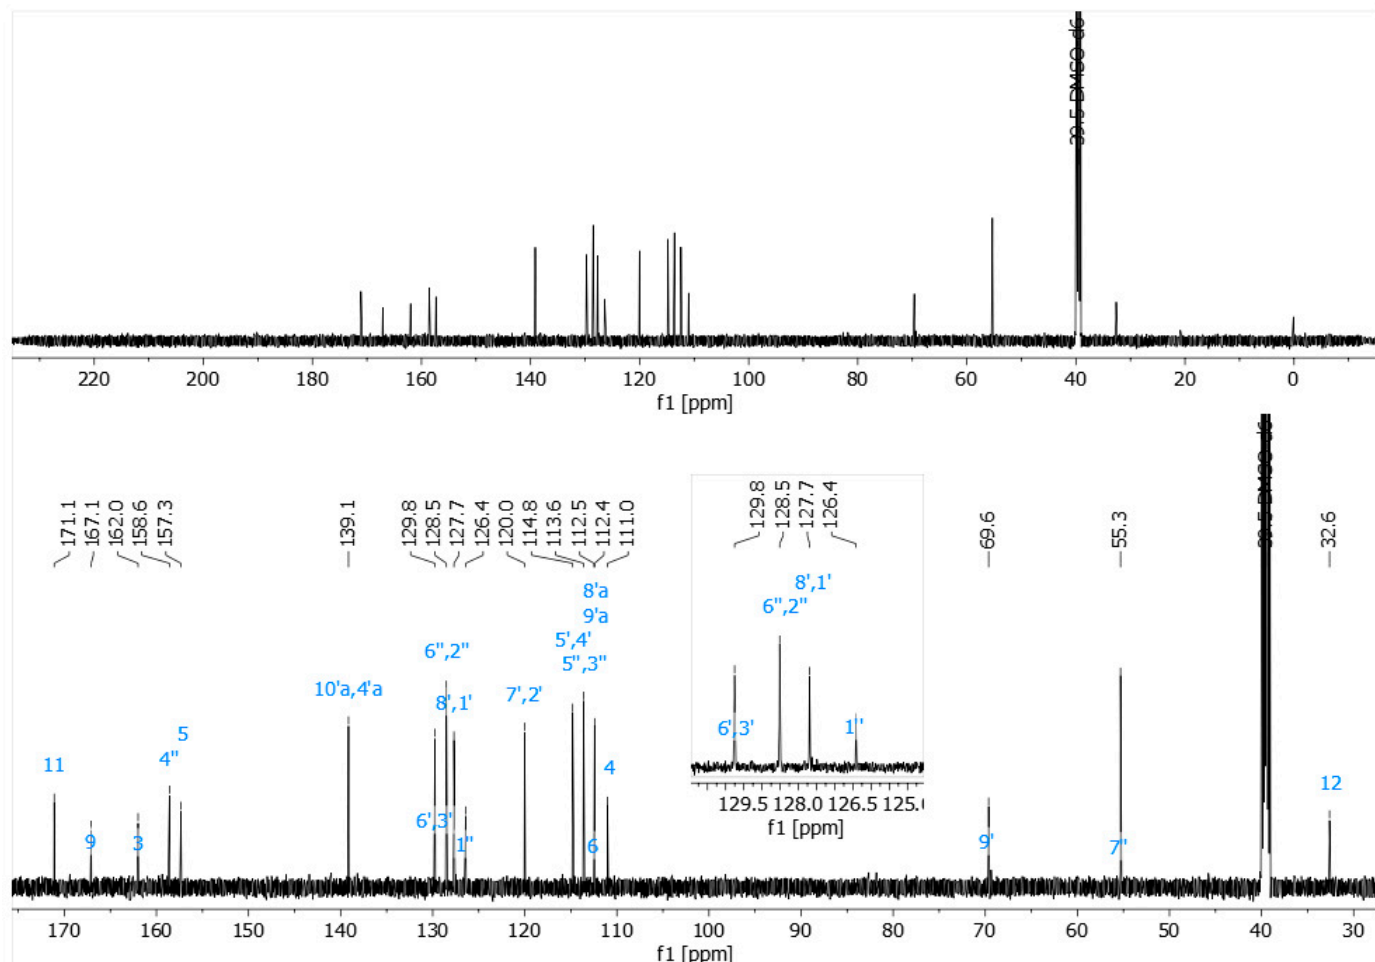

<sup>13</sup>C NMR (150 MHz, DMSO-d<sub>6</sub>) spectrum of derivative **7b**.

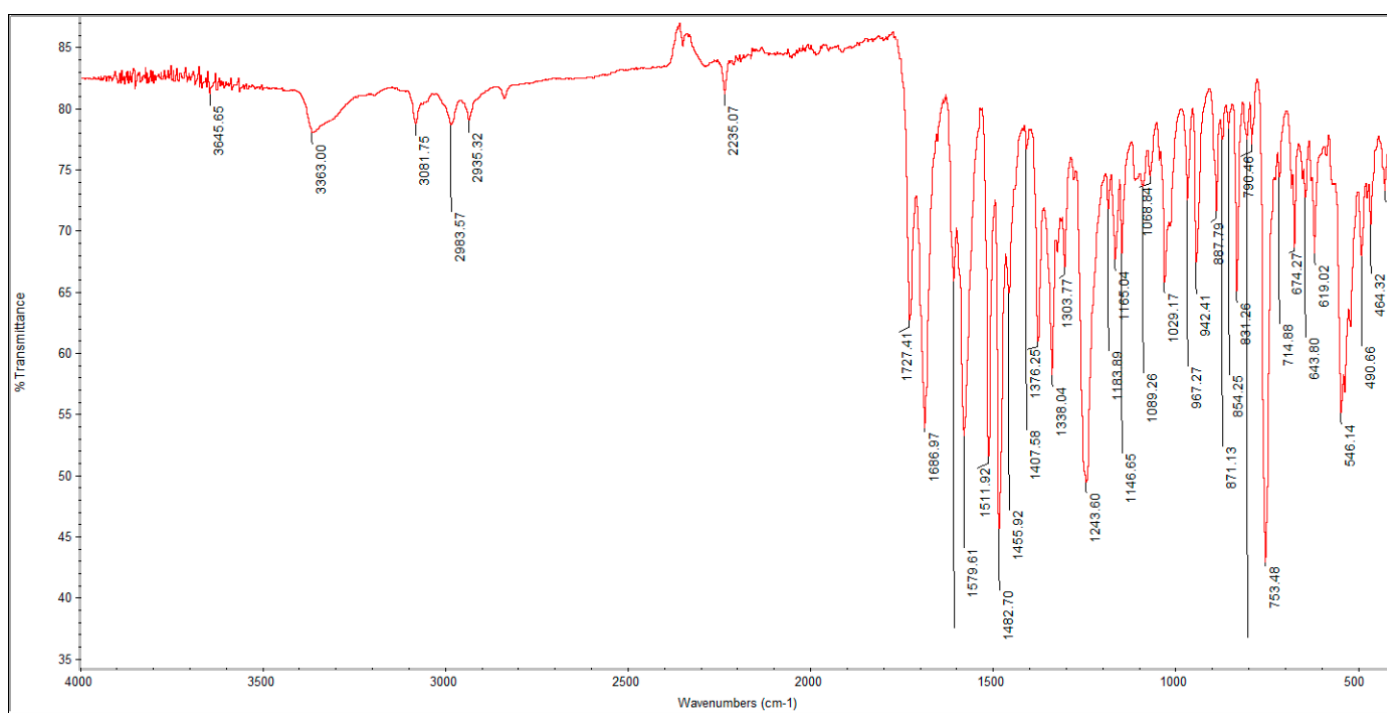

FTIR spectrum of derivative **7b**.



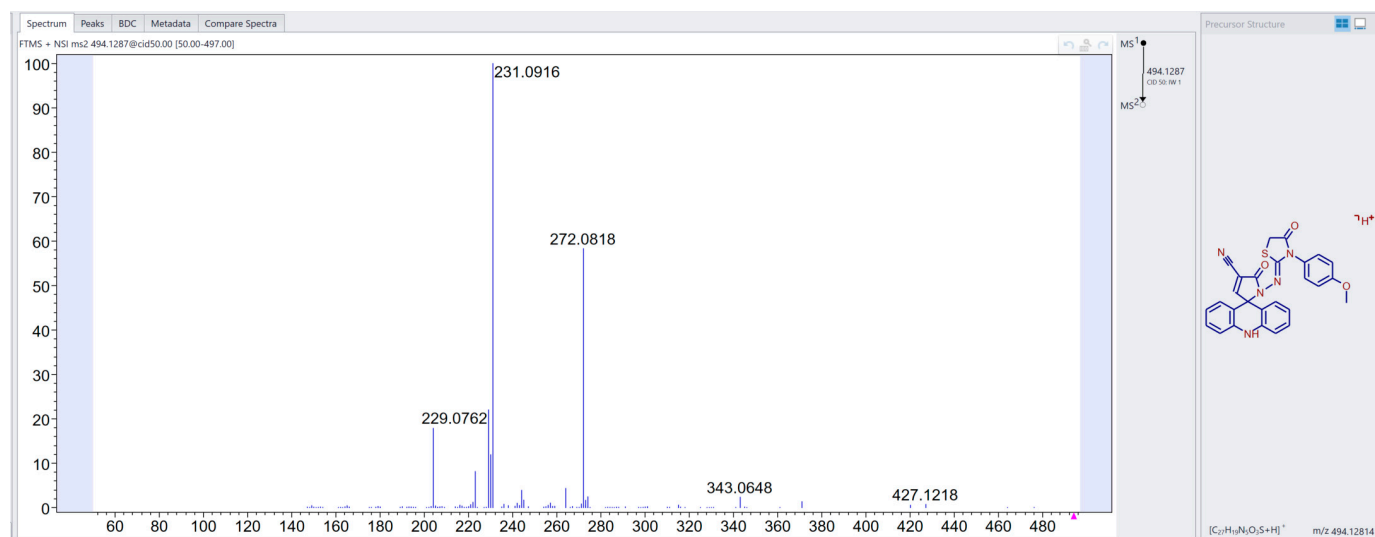

MS2 spectrum of derivative **7b**.

2.8 1'-{[(2Z)-3-(3-Methoxyphenyl)-4-oxo-1,3-thiazolidin-2-ylidene]amino}-5'-oxo-1',5'-dihydro-10H-spiro[acridine-9,2'-pyrrole]-4'-carbonitrile (**7c**)

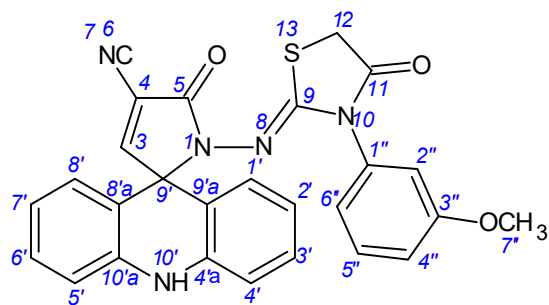

**7c**

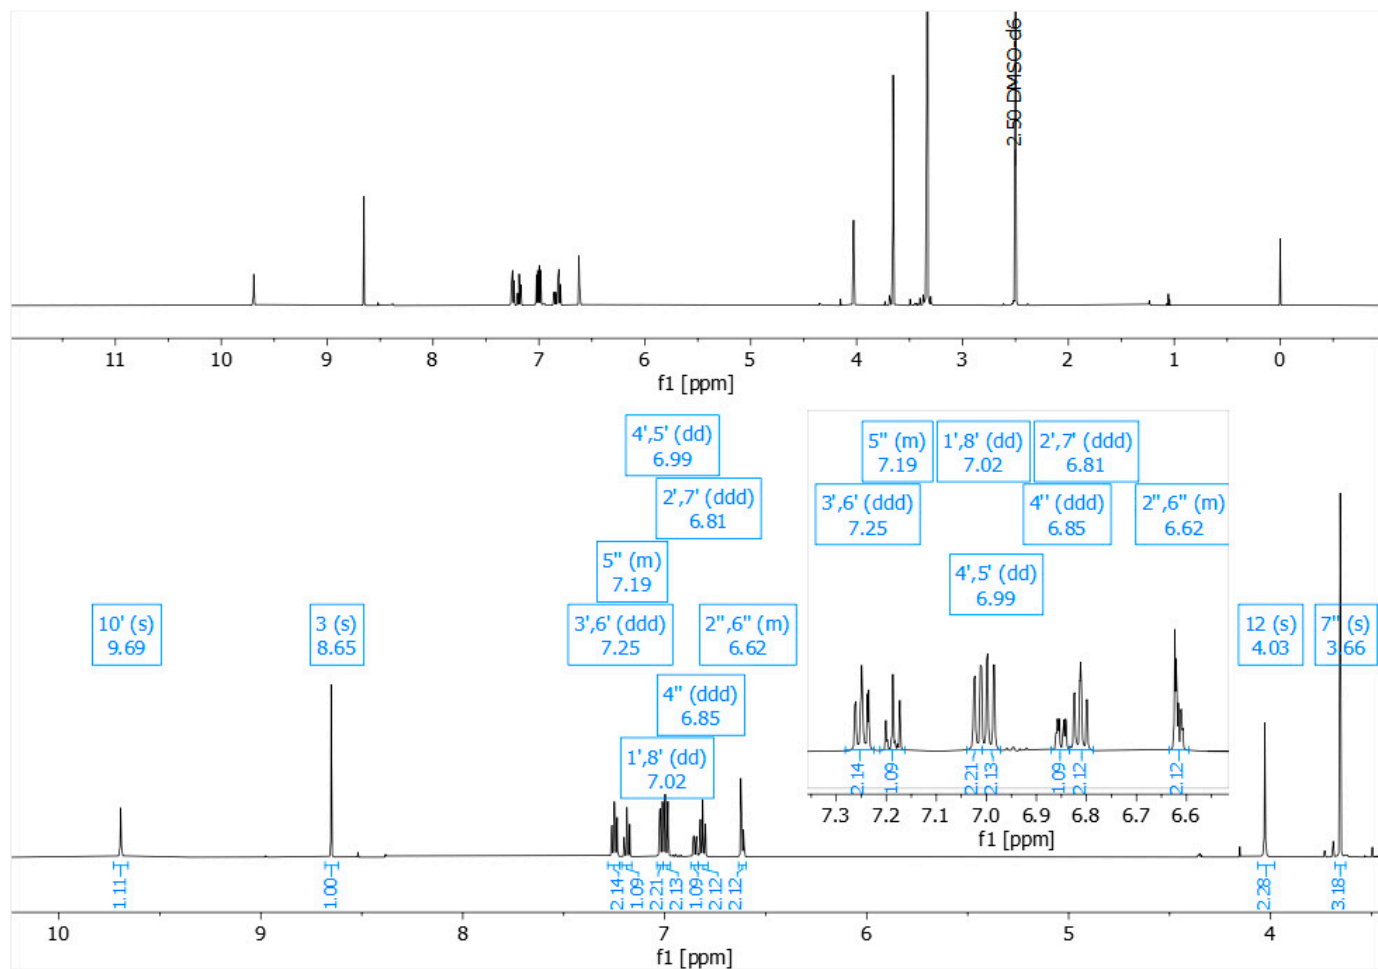

<sup>1</sup>H NMR (600 MHz, DMSO-d<sub>6</sub>) spectrum of derivative **7c**.

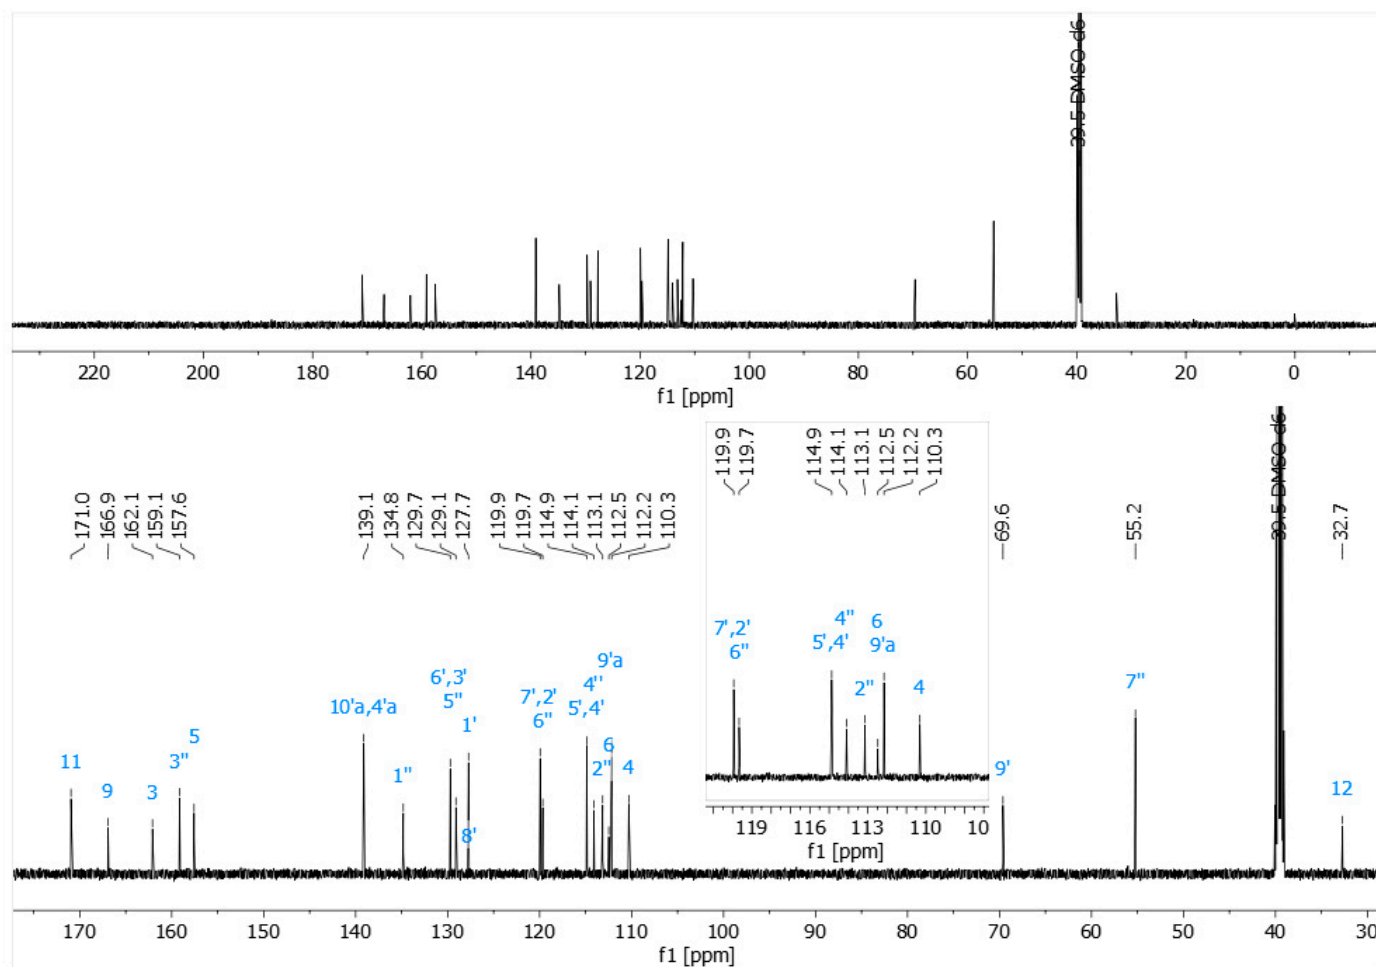

**<sup>13</sup>C NMR (150 MHz, DMSO-d<sub>6</sub>) spectrum of derivative 7c.**

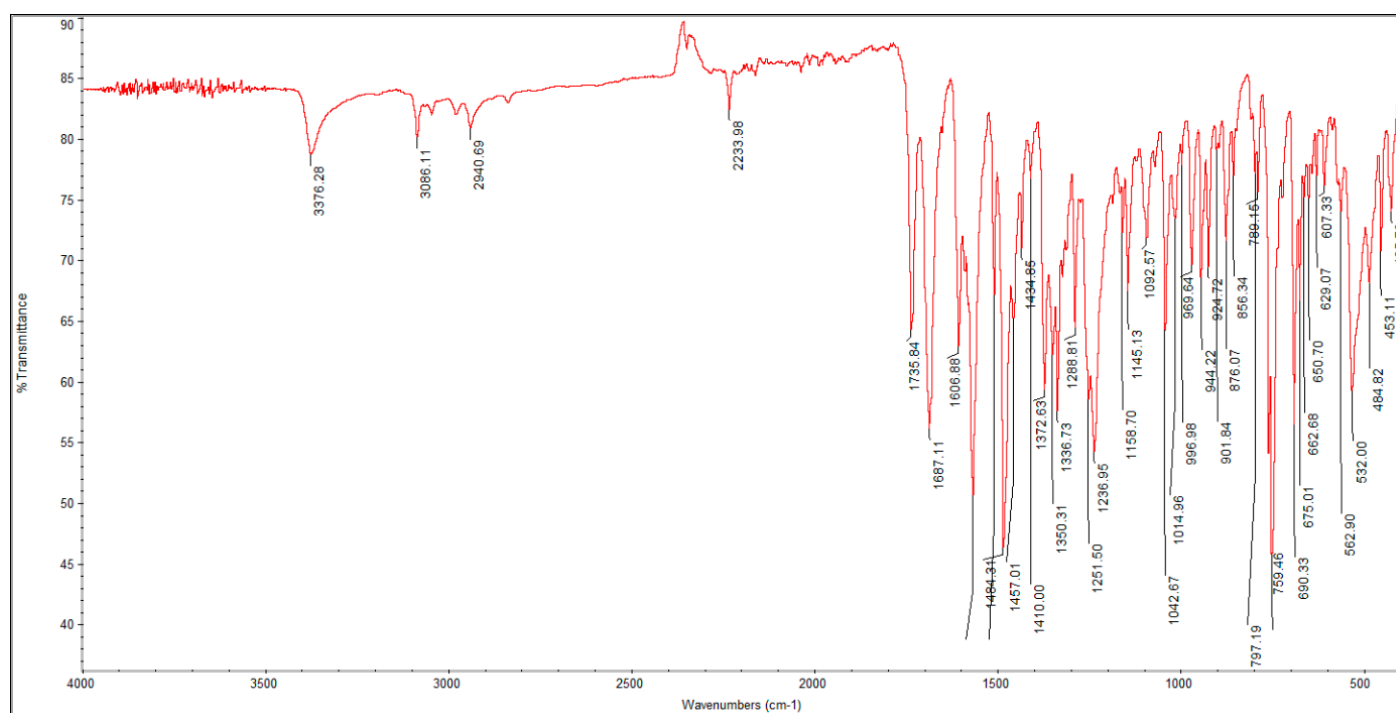

**FTIR spectrum of derivative 7c.**

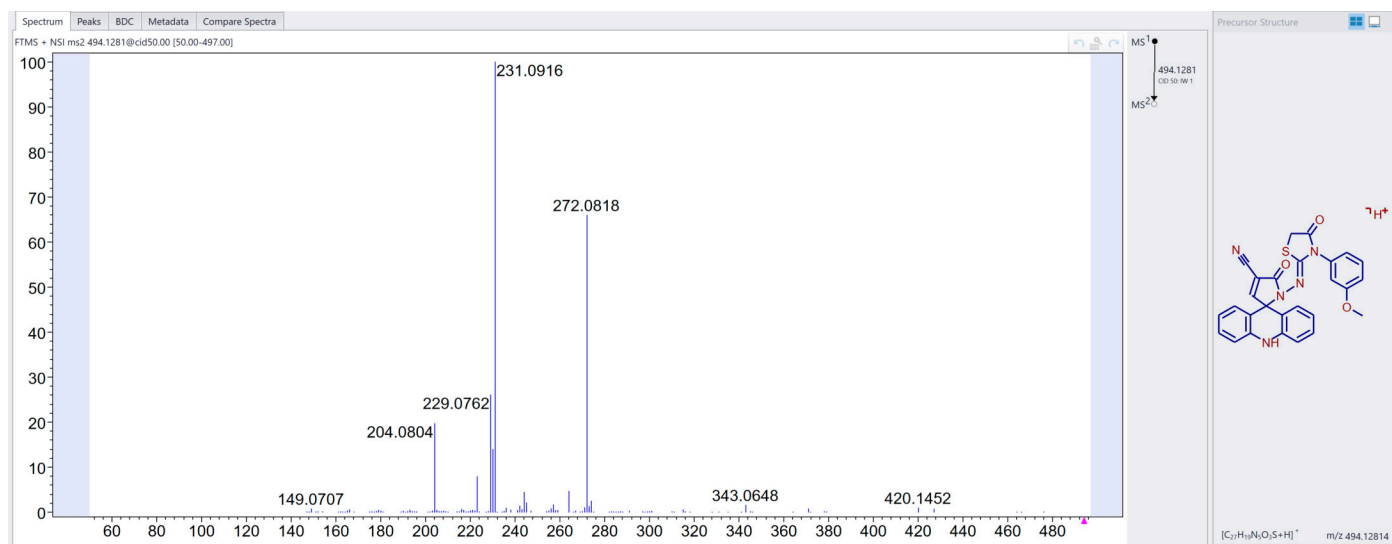

MS2 spectrum of derivative **7c**.

2.9 1'-{[(2Z)-3-(4-Fluorophenyl)-4-oxo-1,3-thiazolidin-2-ylidene]amino}-5'-oxo-1',5'-dihydro-10*H*-spiro[acridine-9,2'-pyrrole]-4'-carbonitrile (**7d**)

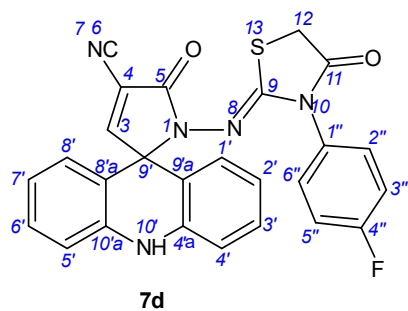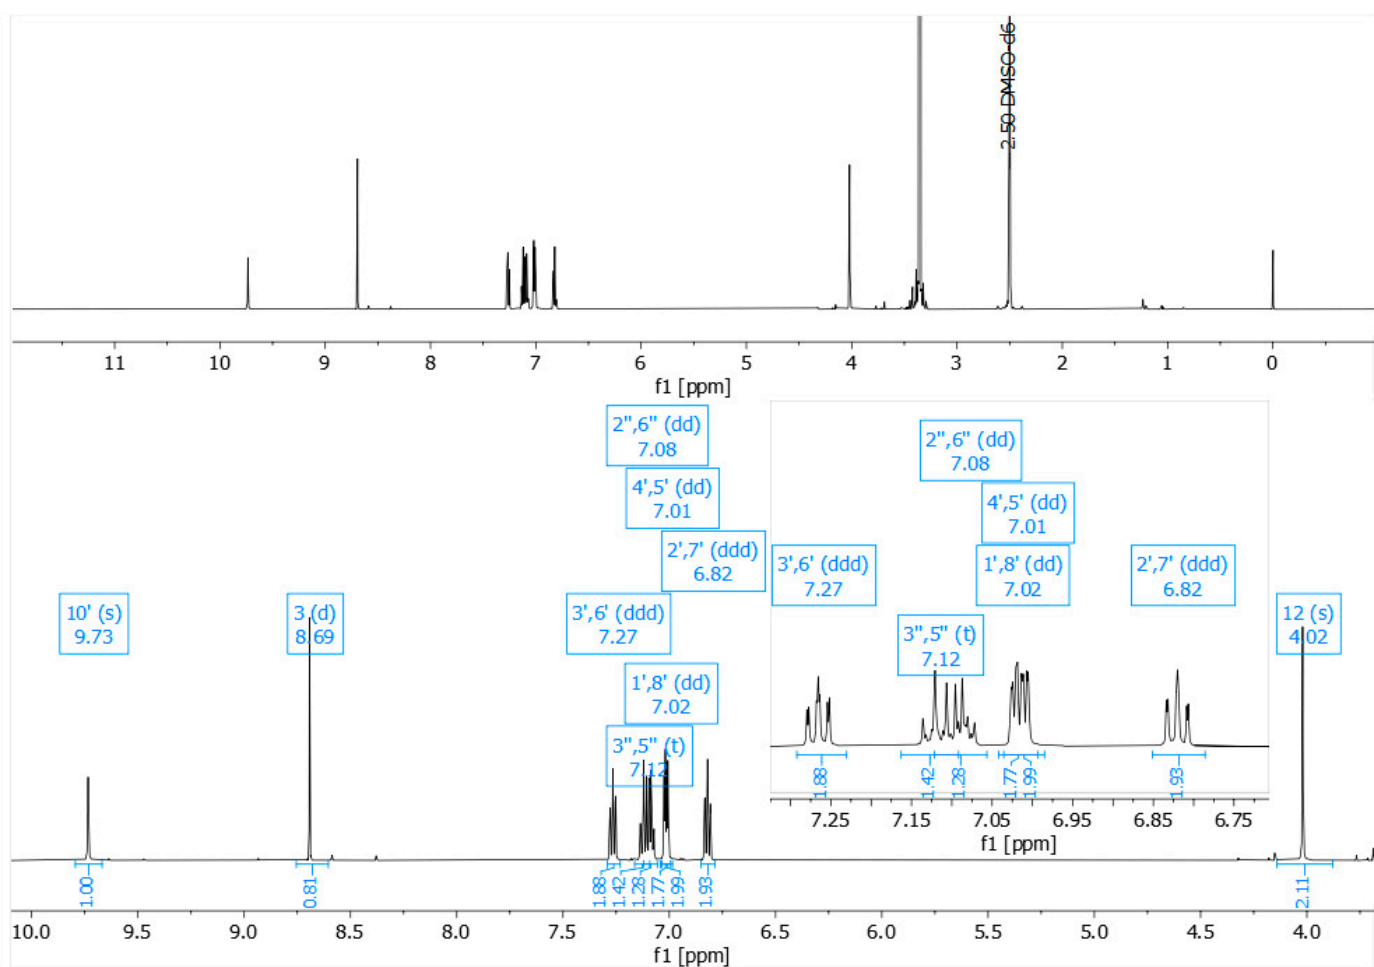

<sup>1</sup>H NMR (600 MHz, DMSO-d<sub>6</sub>) spectrum of derivative **7d**.

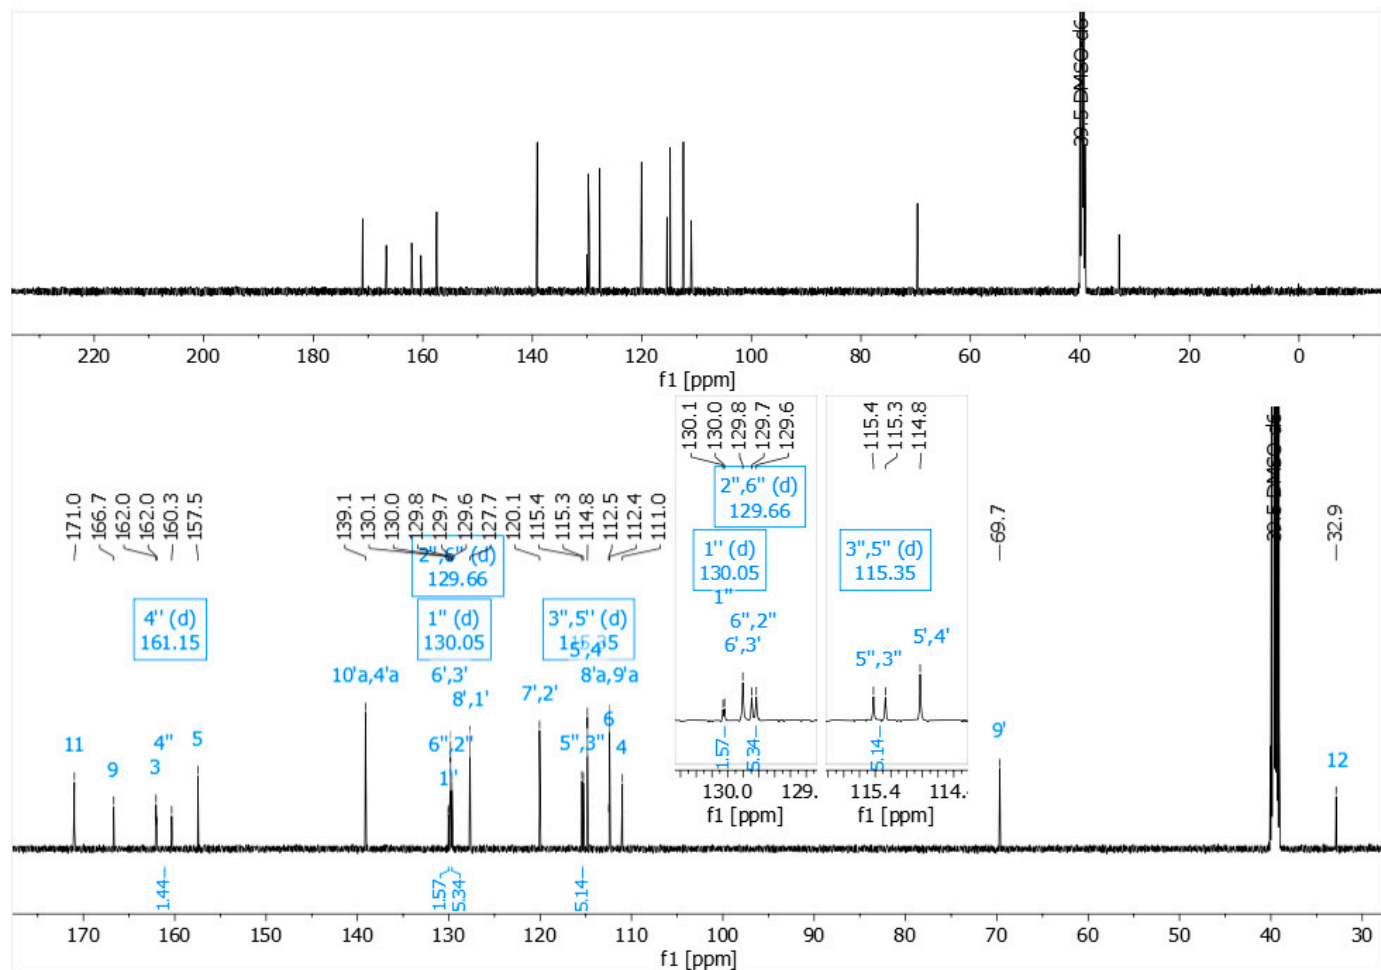

<sup>13</sup>C NMR (150 MHz, DMSO-d<sub>6</sub>) spectrum of derivative **7d**.

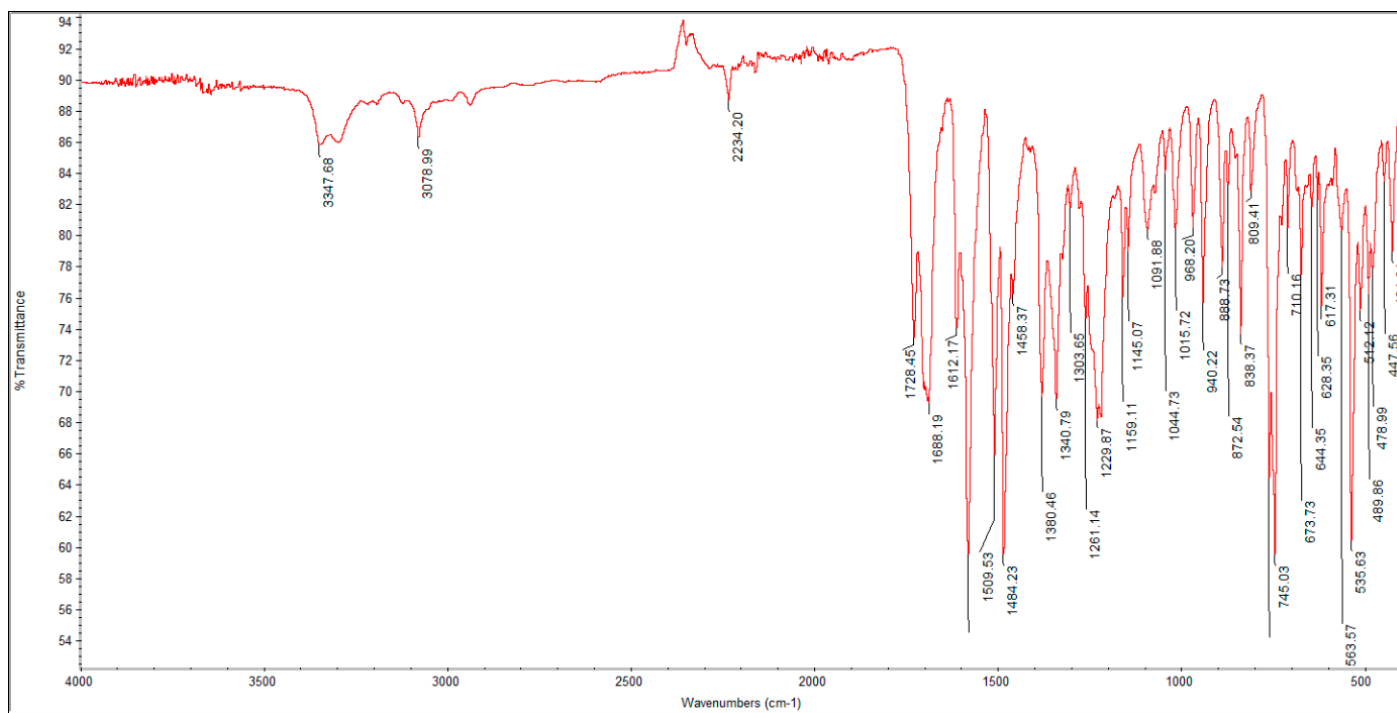

FTIR spectrum of derivative **7d**.

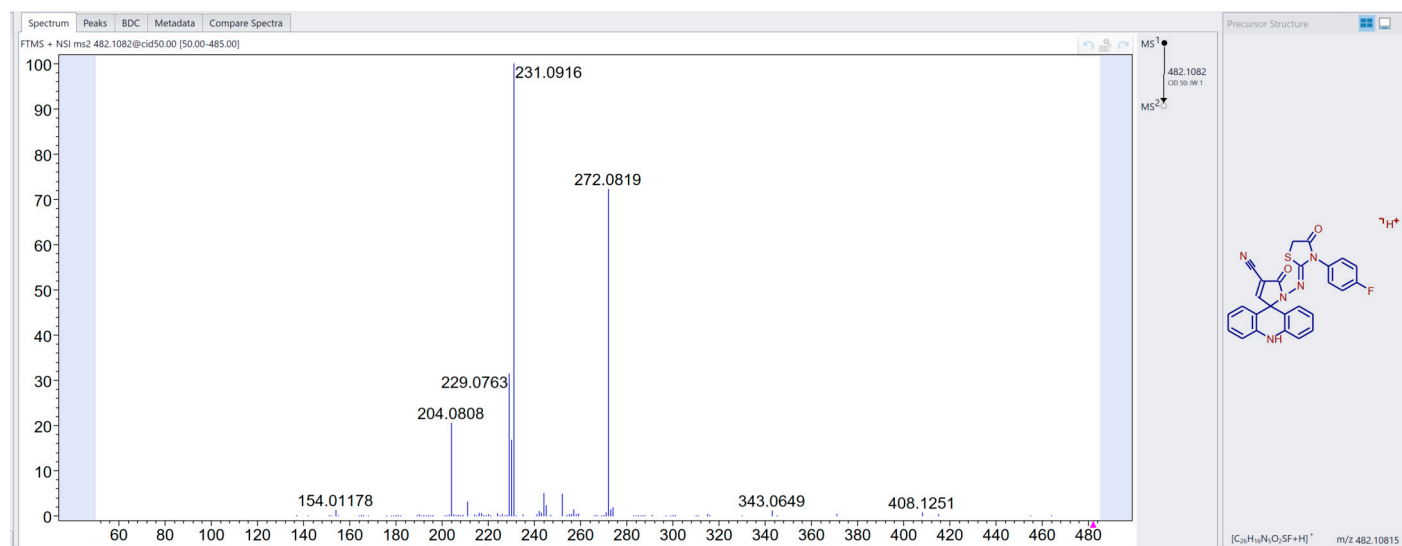

MS2 spectrum of derivative **7d**.

2.10 1'-{[(2Z)-3-(4-Nitrophenyl)-4-oxo-1,3-thiazolidin-2-ylidene]amino}-5'-oxo-1',5'-dihydro-10*H*-spiro[acridine-9,2'-pyrrole]-4'-carbonitrile (**7e**)

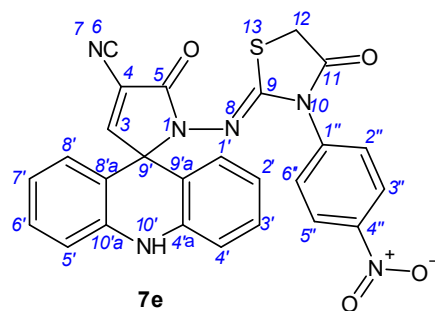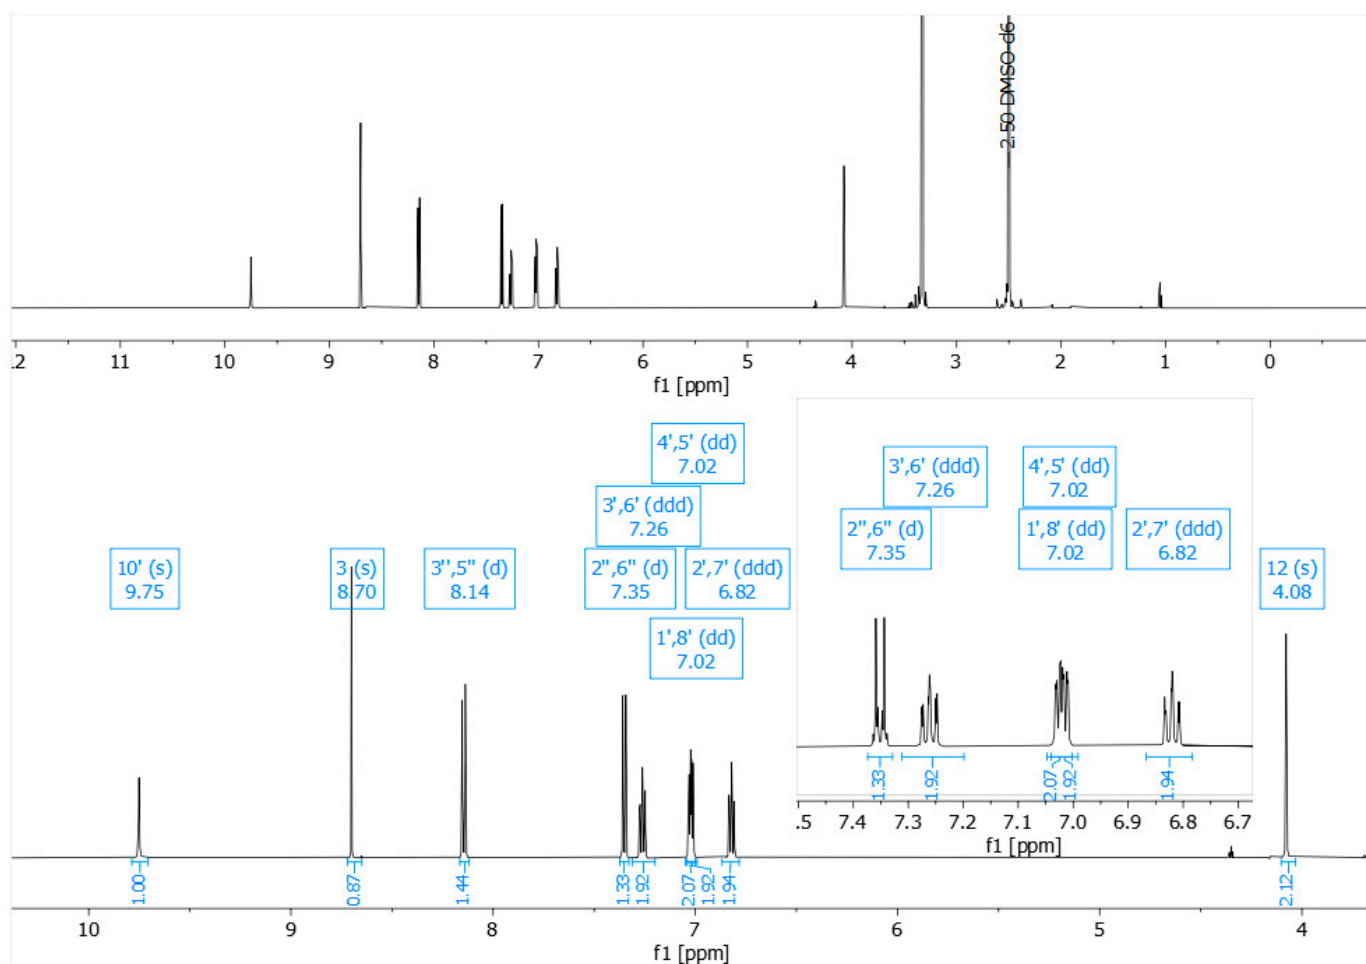

$^1\text{H}$  NMR (600 MHz, DMSO- $\text{d}_6$ ) spectrum of derivative **7e**.



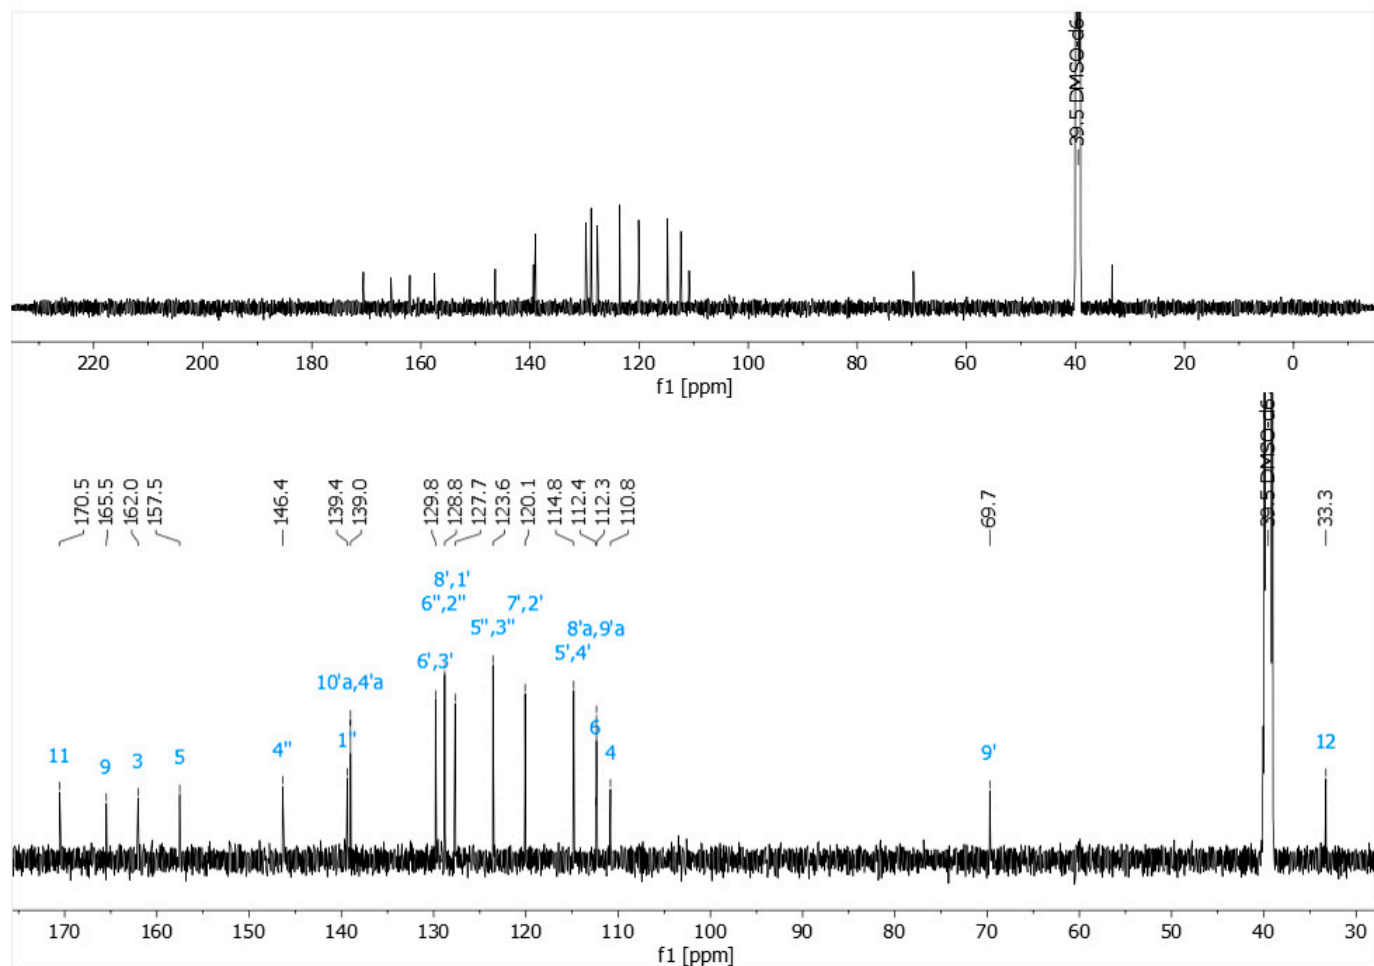

<sup>13</sup>C NMR (150 MHz, DMSO-d<sub>6</sub>) spectrum of derivative **7e**.

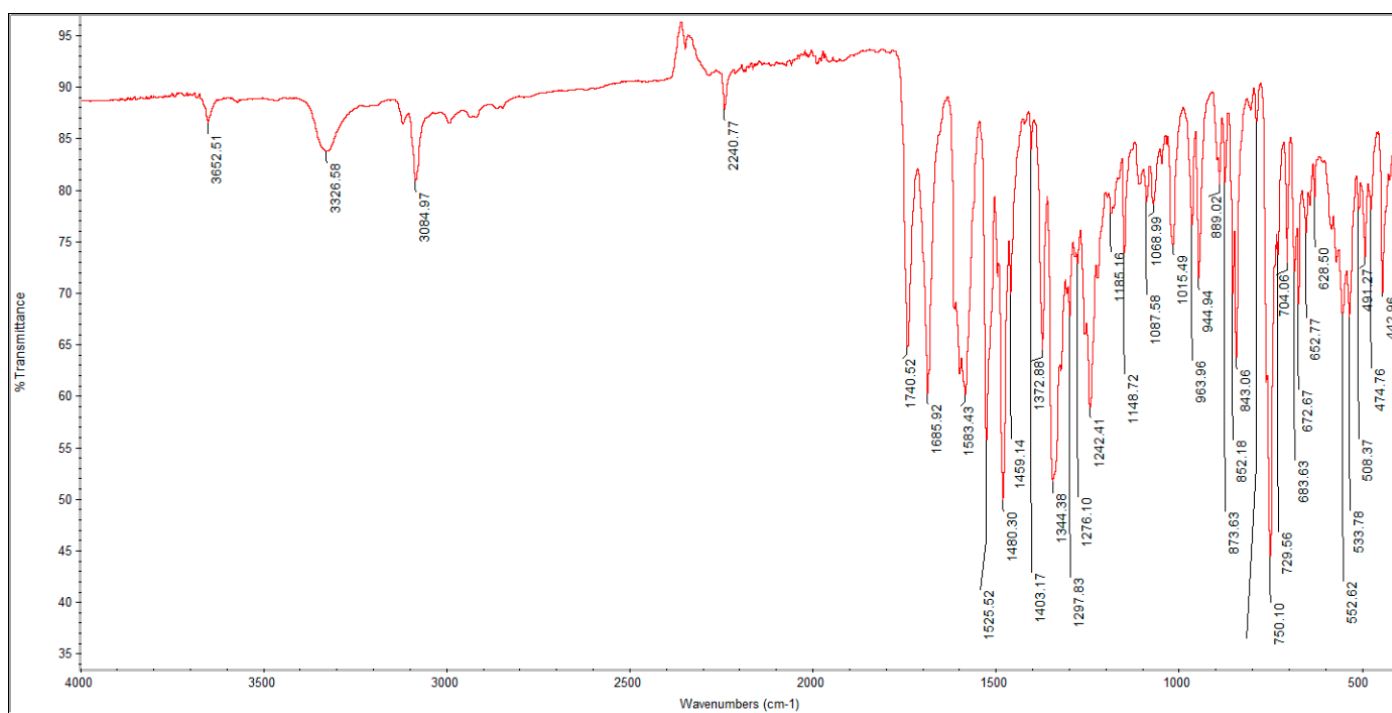

FTIR spectrum of derivative **7e**.

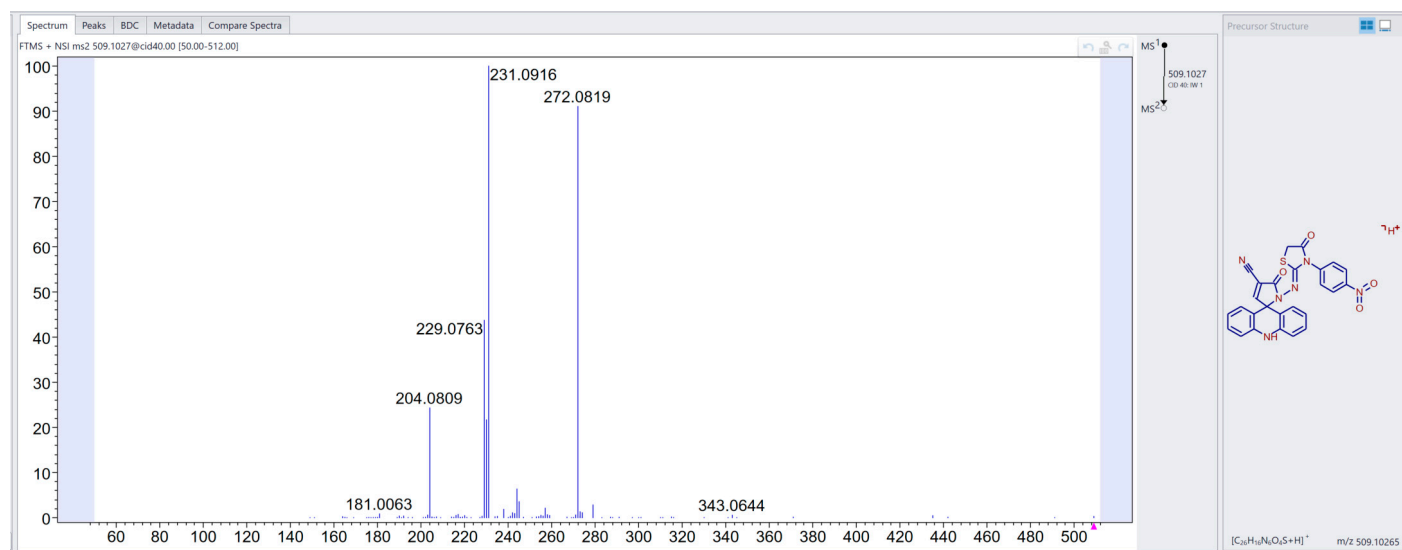

MS2 spectrum of derivative **7e**.

2.11 Ethyl 2-[(2Z,5Z)-2-({4'-cyano-5'-oxo-1',5'-dihydro-10H-spiro[acridine-9,2'-pyrrol]-1'-yl)imino)-4-oxo-3-phenyl-1,3-thiazolidin-5-ylidene]acetate (**8a**)

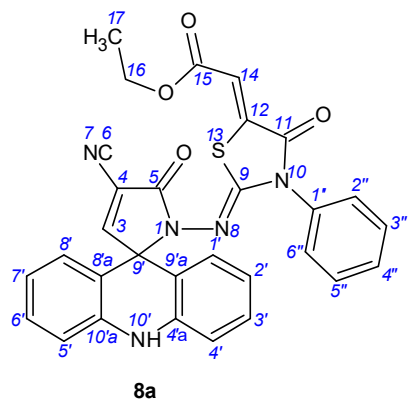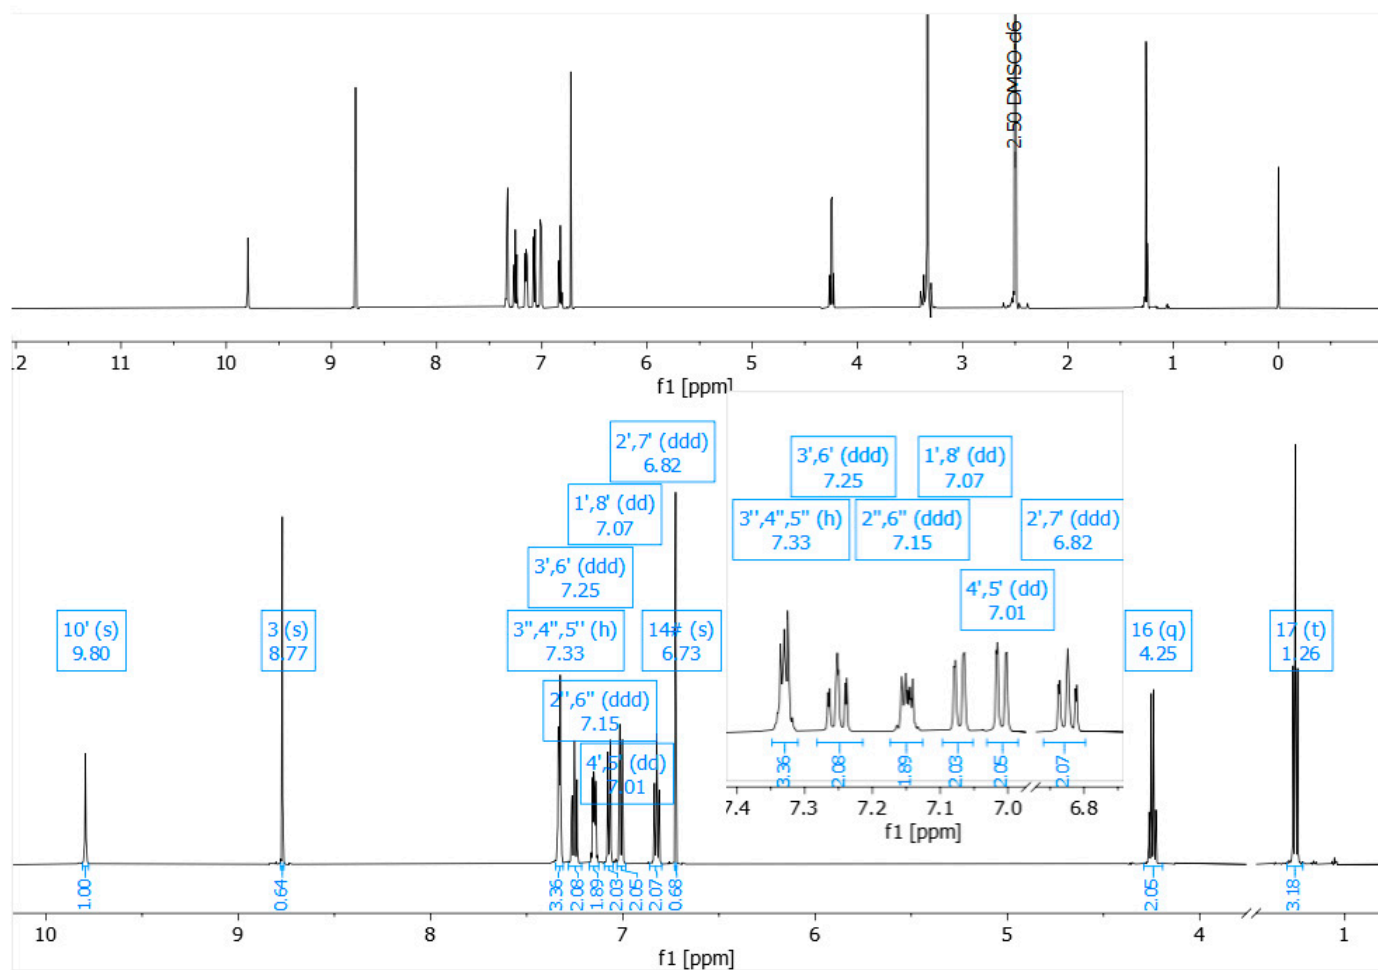

<sup>1</sup>H NMR (600 MHz, DMSO-d<sub>6</sub>) spectrum of derivative **8a**.

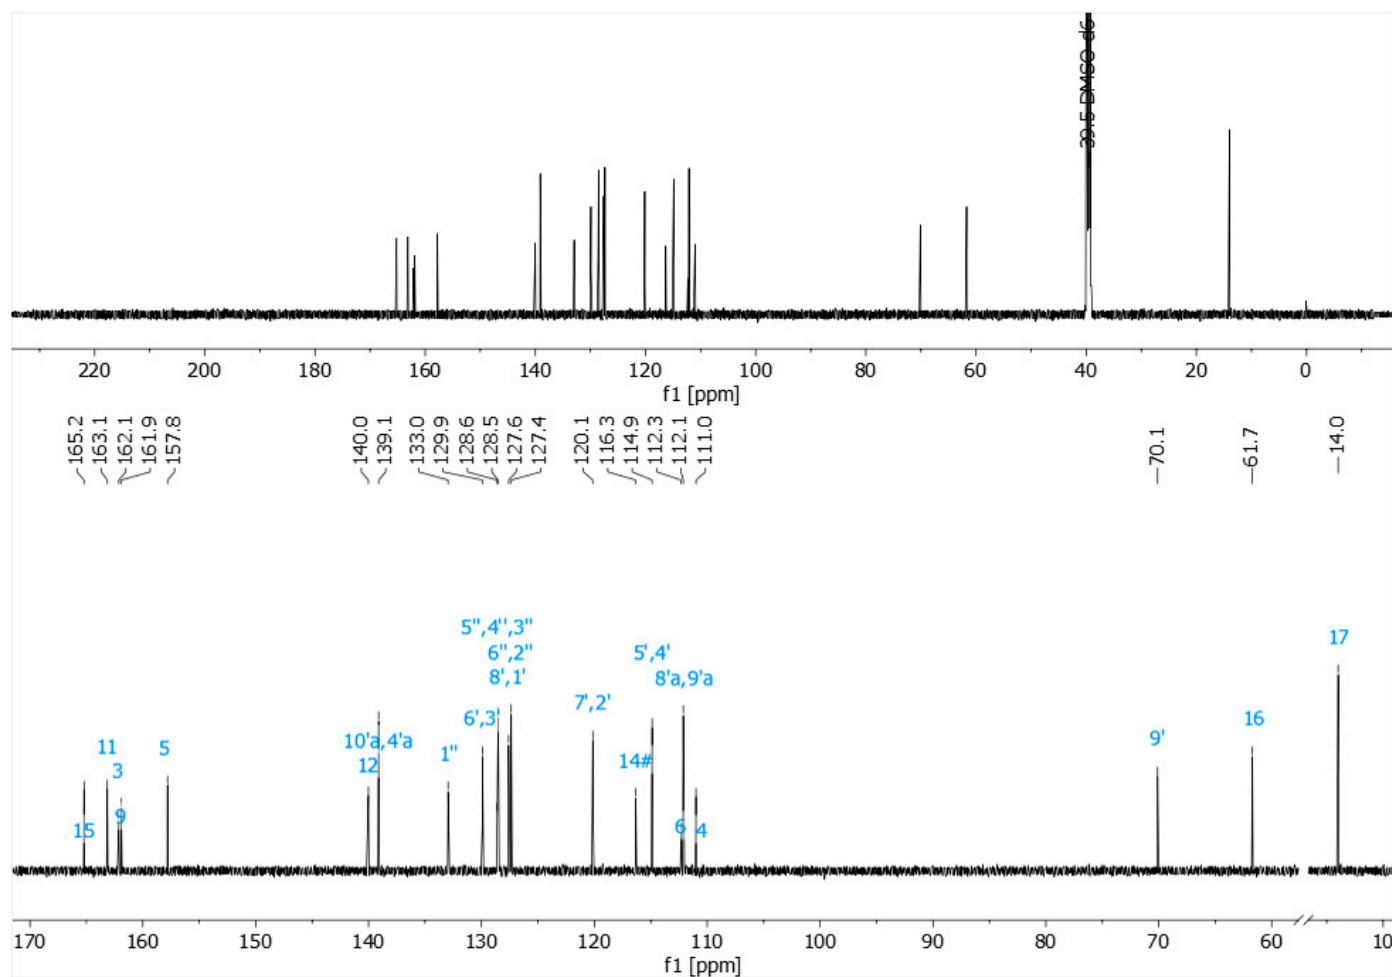

<sup>13</sup>C NMR (150 MHz, DMSO-d<sub>6</sub>) spectrum of derivative **8a**.

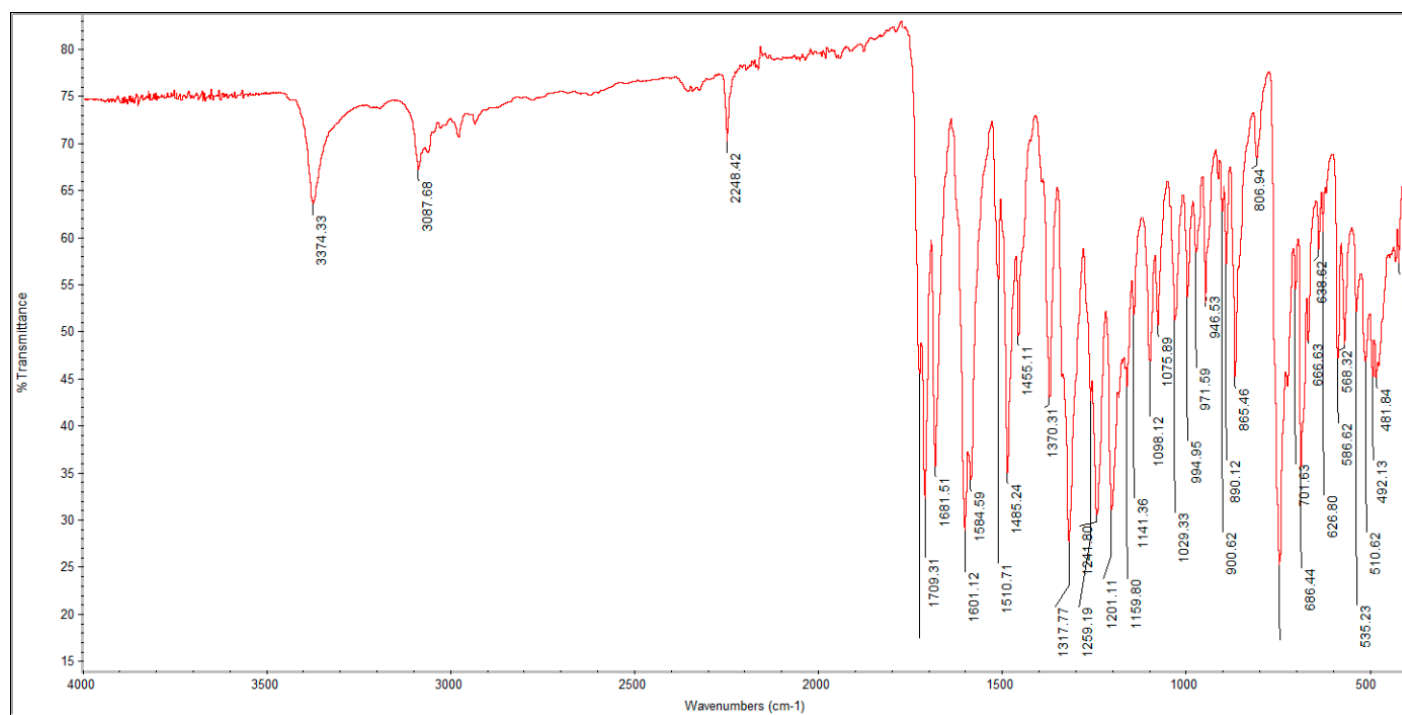

FTIR spectrum of derivative **8a**.

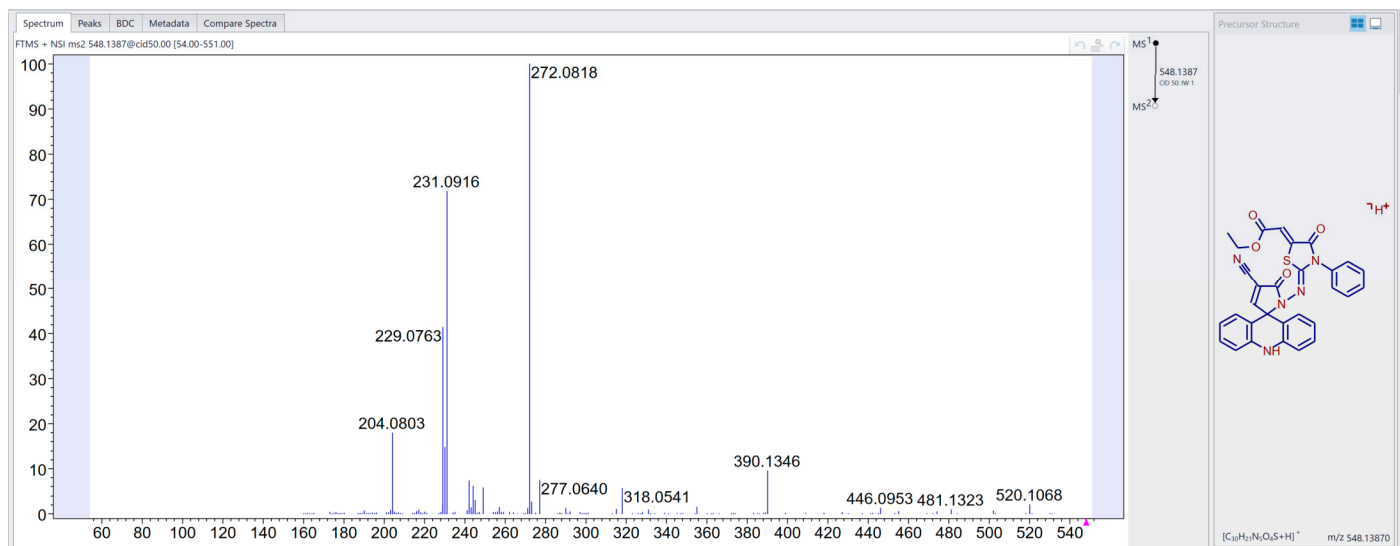

MS2 spectrum of derivative **8a**.

2.12 Ethyl 2-[(2Z,5Z)-2-({4'-cyano-5'-oxo-1',5'-dihydro-10*H*-spiro[acridine-9,2'-pyrrol]-1'-yl)imino)-3-(4-methoxyphenyl)-4-oxo-1,3-thiazolidin-5-ylidene]acetate (**8b**)

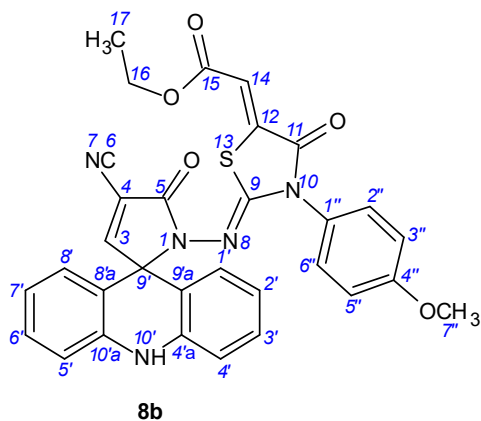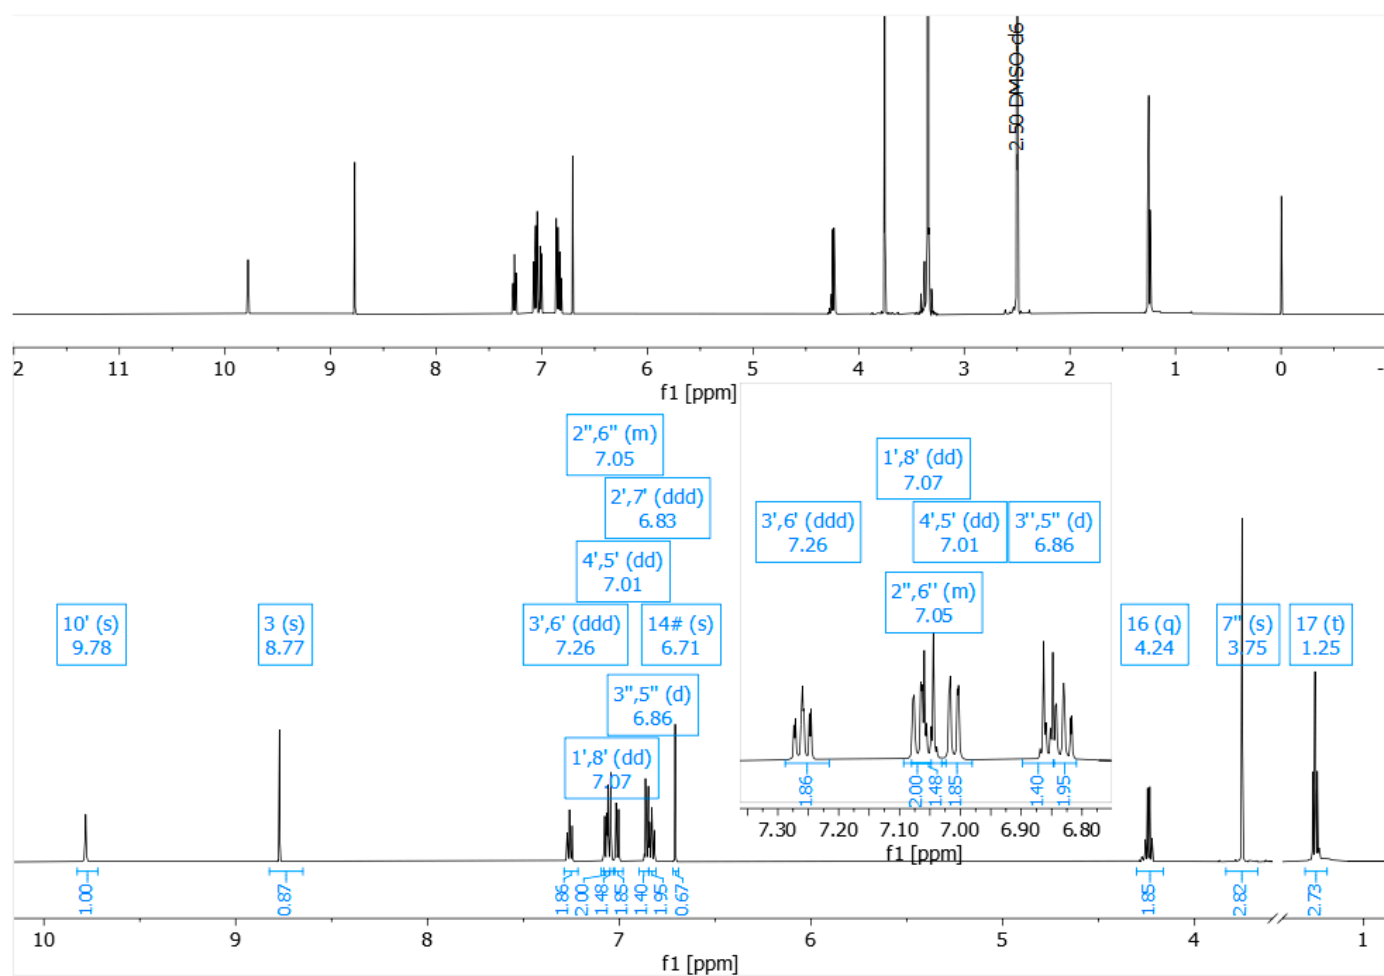

$^1\text{H}$  NMR (600 MHz, DMSO- $d_6$ ) spectrum of derivative **8b**.

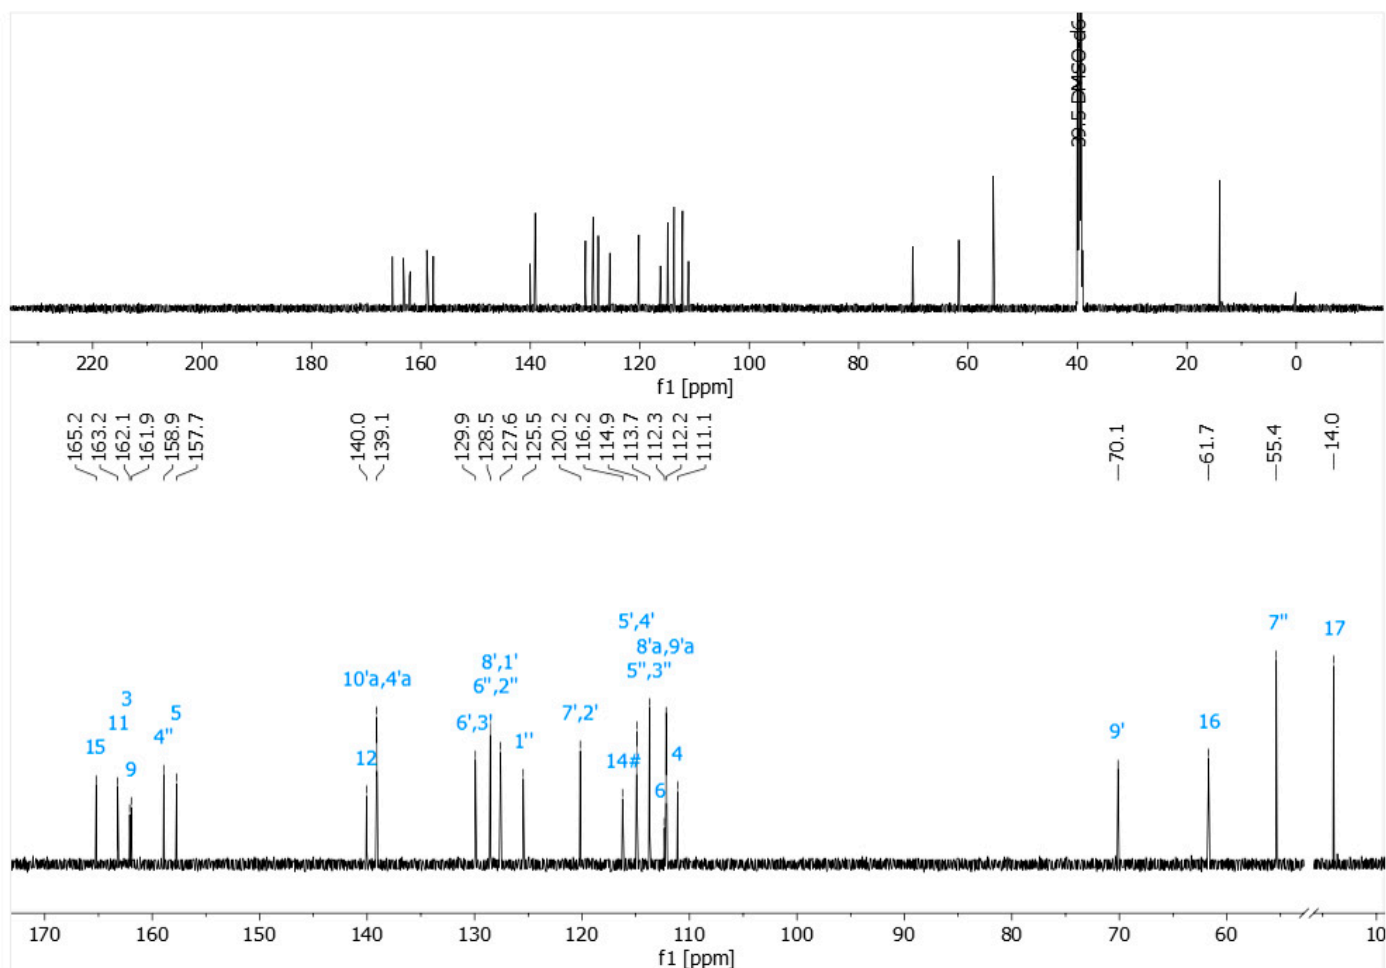

<sup>13</sup>C NMR (150 MHz, DMSO-d<sub>6</sub>) spectrum of derivative **8b**.

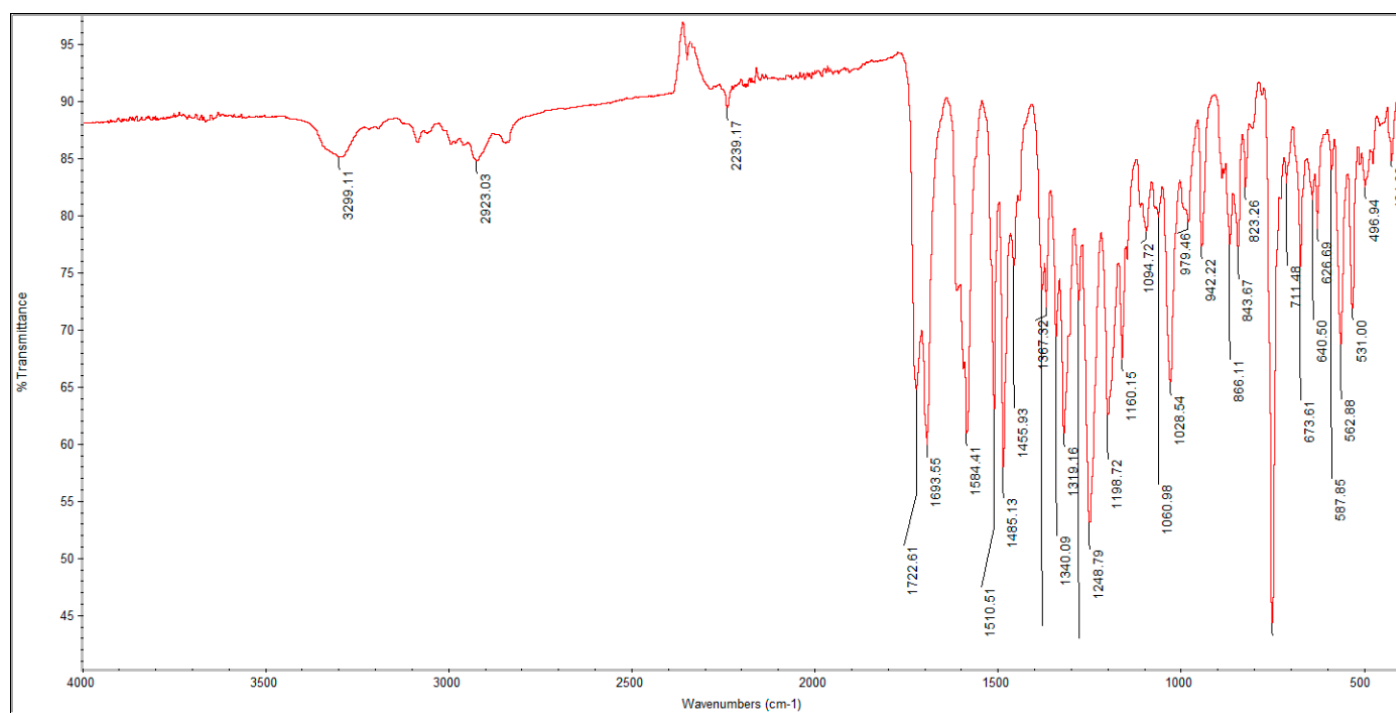

FTIR spectrum of derivative **8b**.

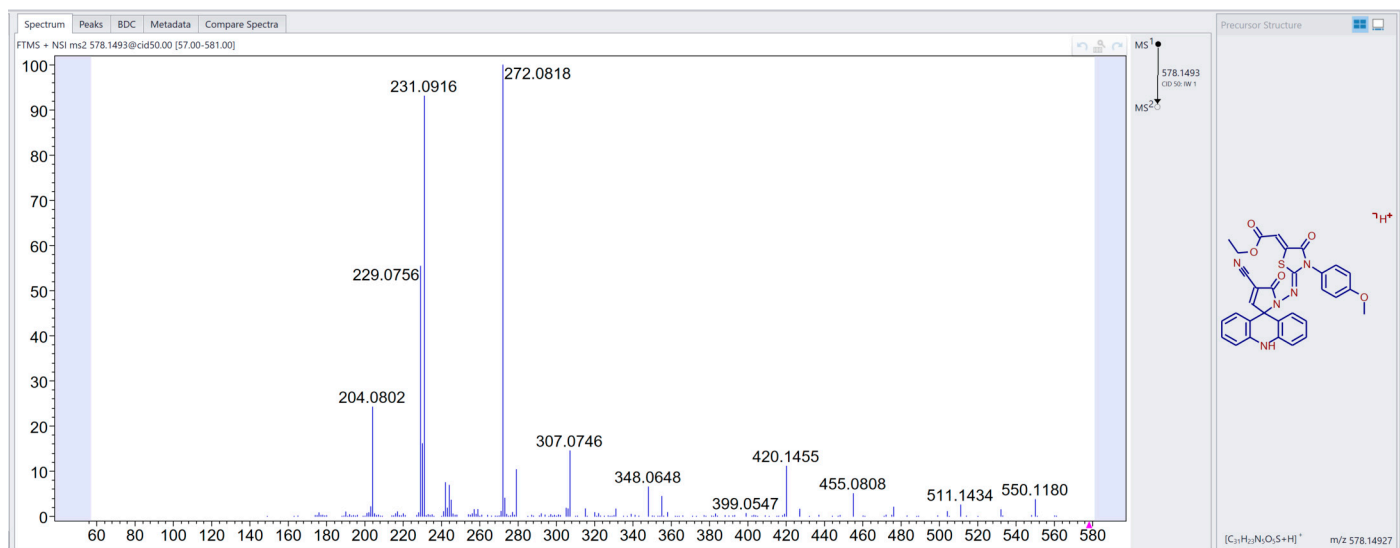

MS2 spectrum of derivative **8b**.



2.13 Ethyl 2-[(2Z,5Z)-2-({4'-cyano-5'-oxo-1',5'-dihydro-10*H*-spiro[acridine-9,2'-pyrrol]-1'-yl)imino)-3-(3-methoxyphenyl)-4-oxo-1,3-thiazolidin-5-ylidene]acetate (**8c**)

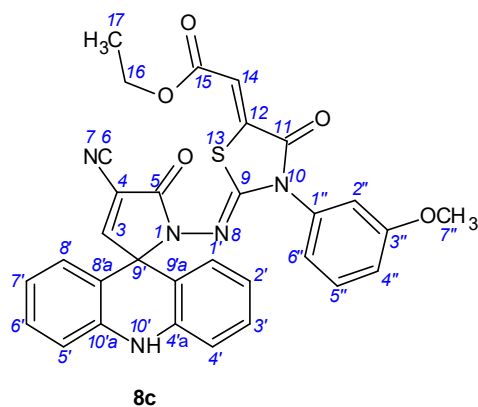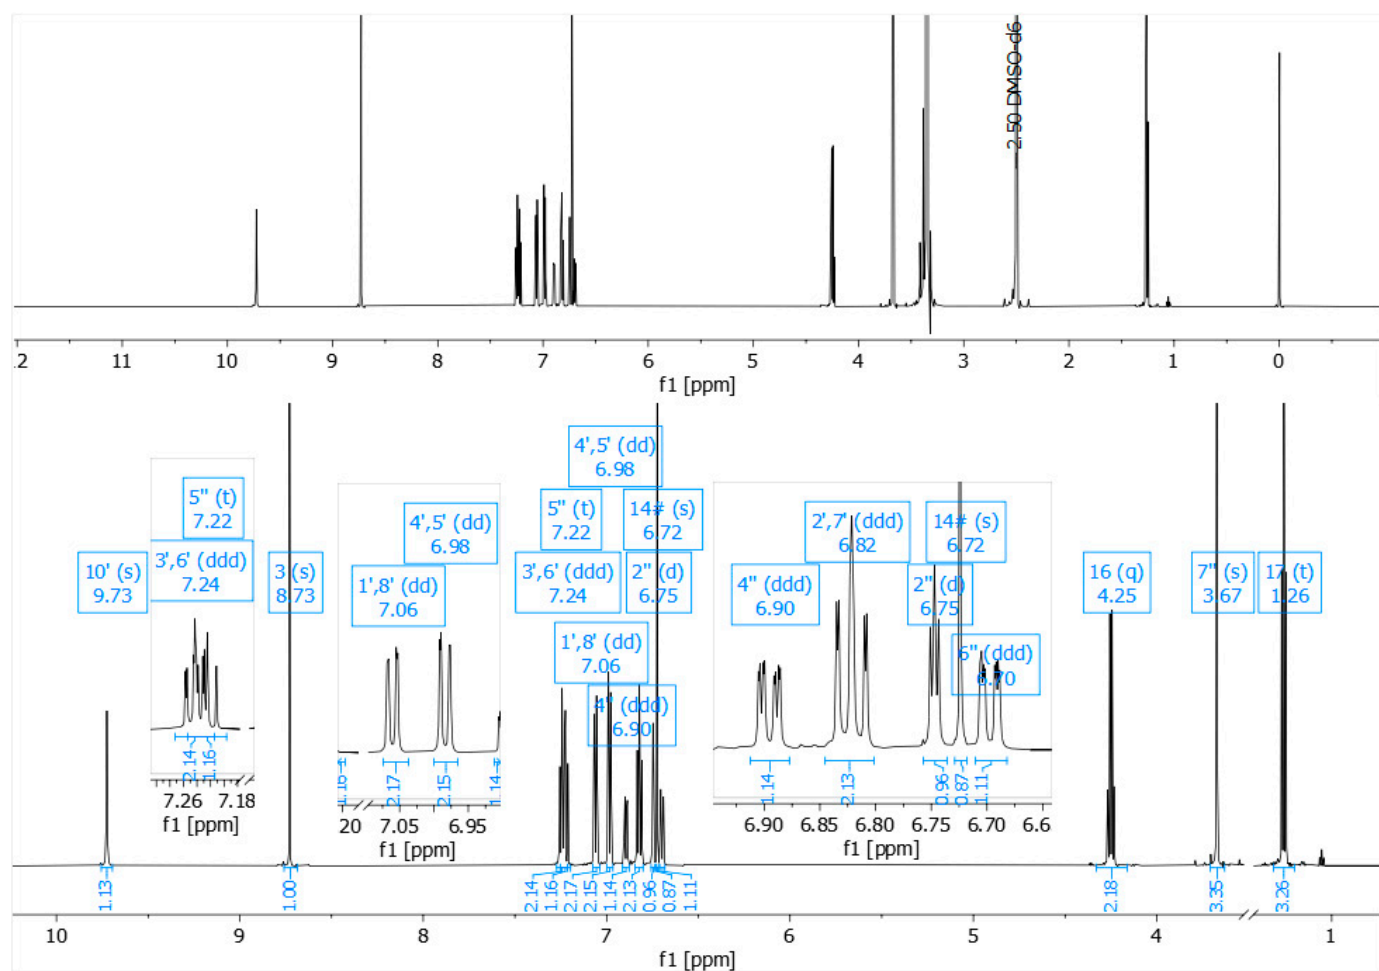

<sup>1</sup>H NMR (600 MHz, DMSO-d<sub>6</sub>) spectrum of derivative **8c**.

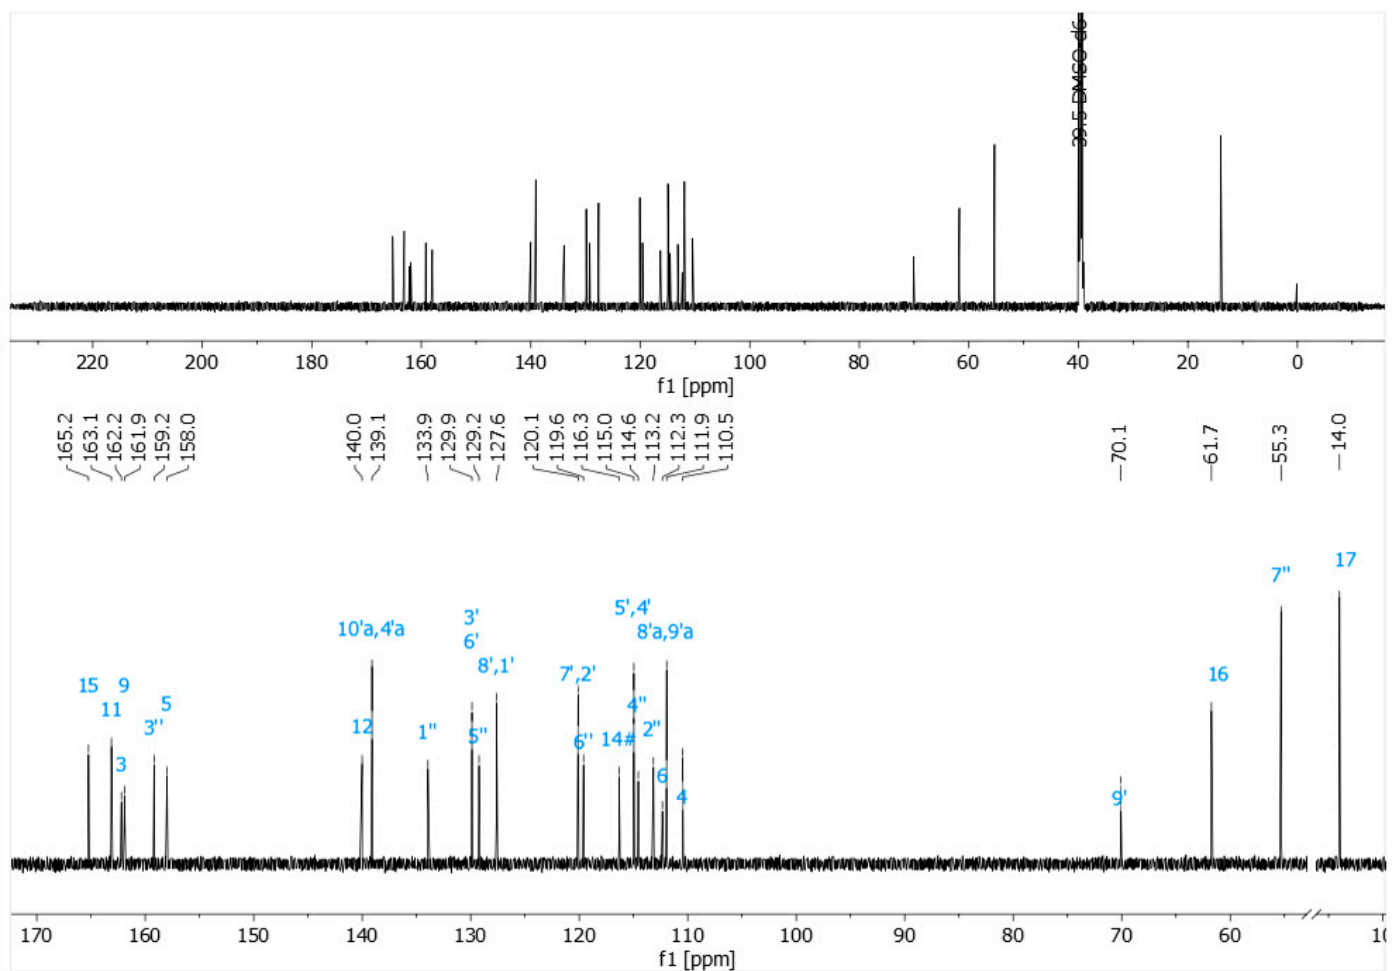

<sup>13</sup>C NMR (150 MHz, DMSO-d<sub>6</sub>) spectrum of derivative **8c**.

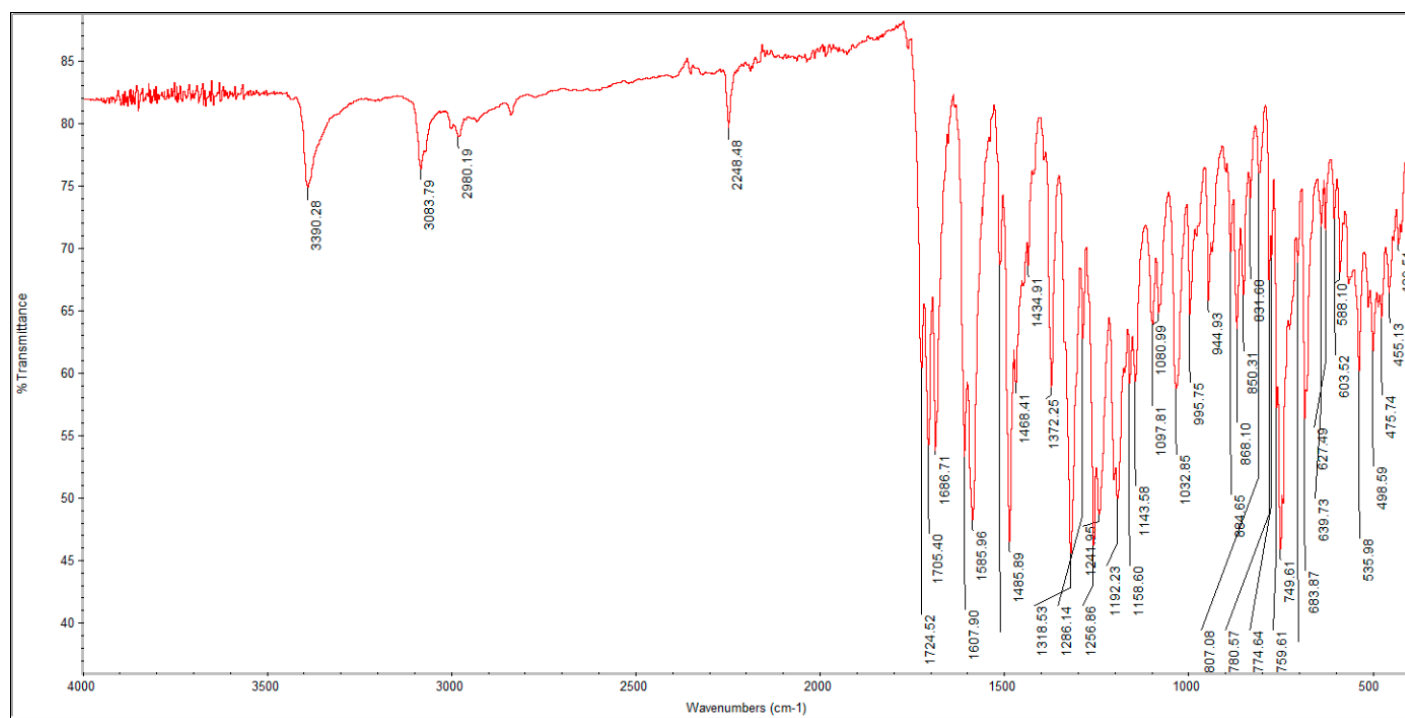

FTIR spectrum of derivative **8c**.

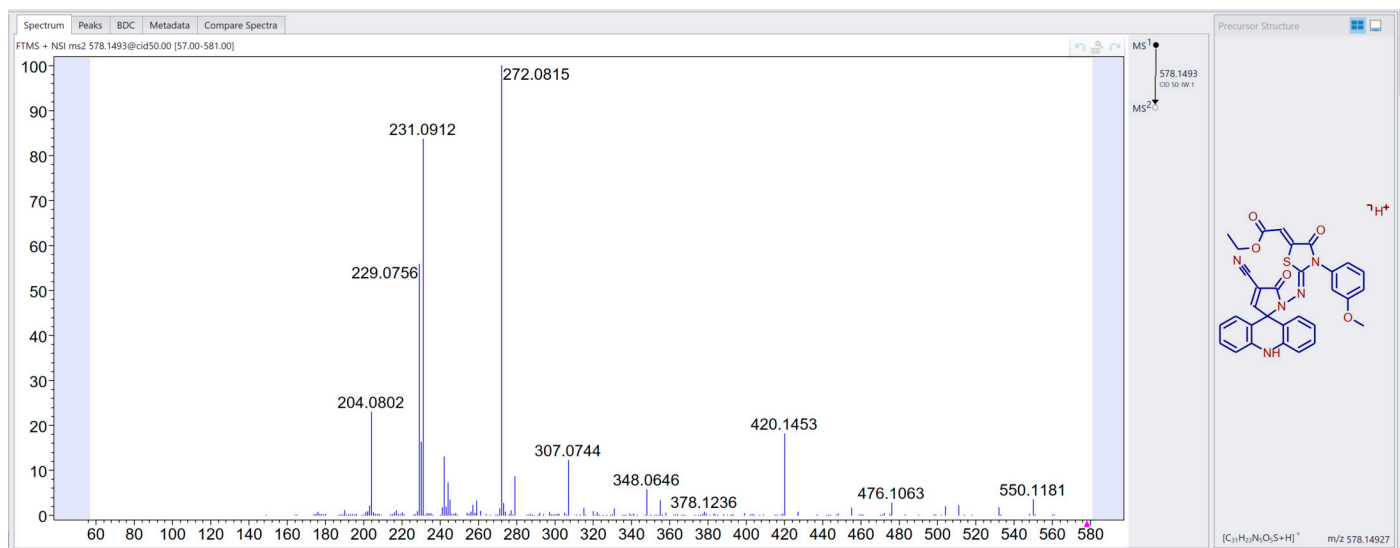

MS2 spectrum of derivative **8c**.

2.14 Ethyl 2-[(2Z,5Z)-2-({4'-cyano-5'-oxo-1',5'-dihydro-10*H*-spiro[acridine-9,2'-pyrrol]-1'-yl)imino)-3-(4-fluorophenyl)-4-oxo-1,3-thiazolidin-5-ylidene]acetate (**8d**)

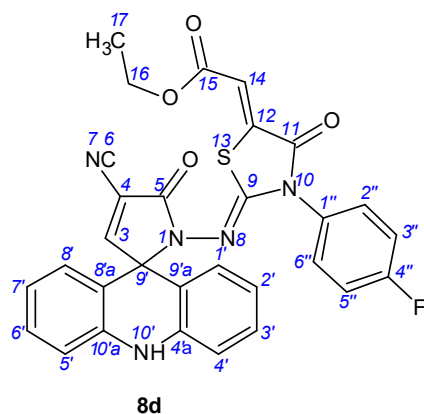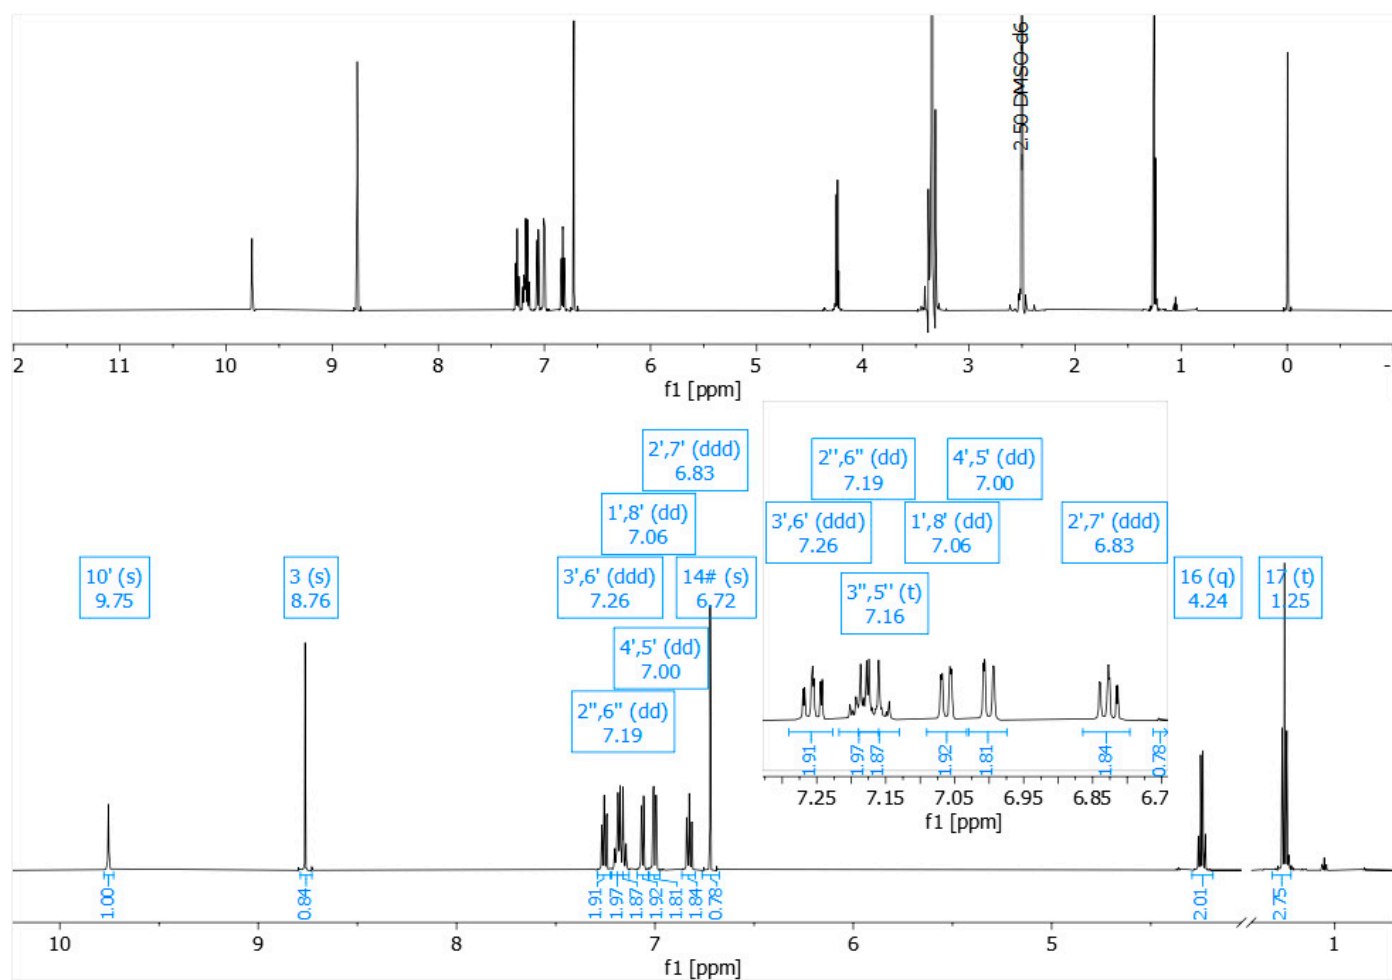

<sup>1</sup>H NMR (600 MHz, DMSO-d<sub>6</sub>) spectrum of derivative **8d**.

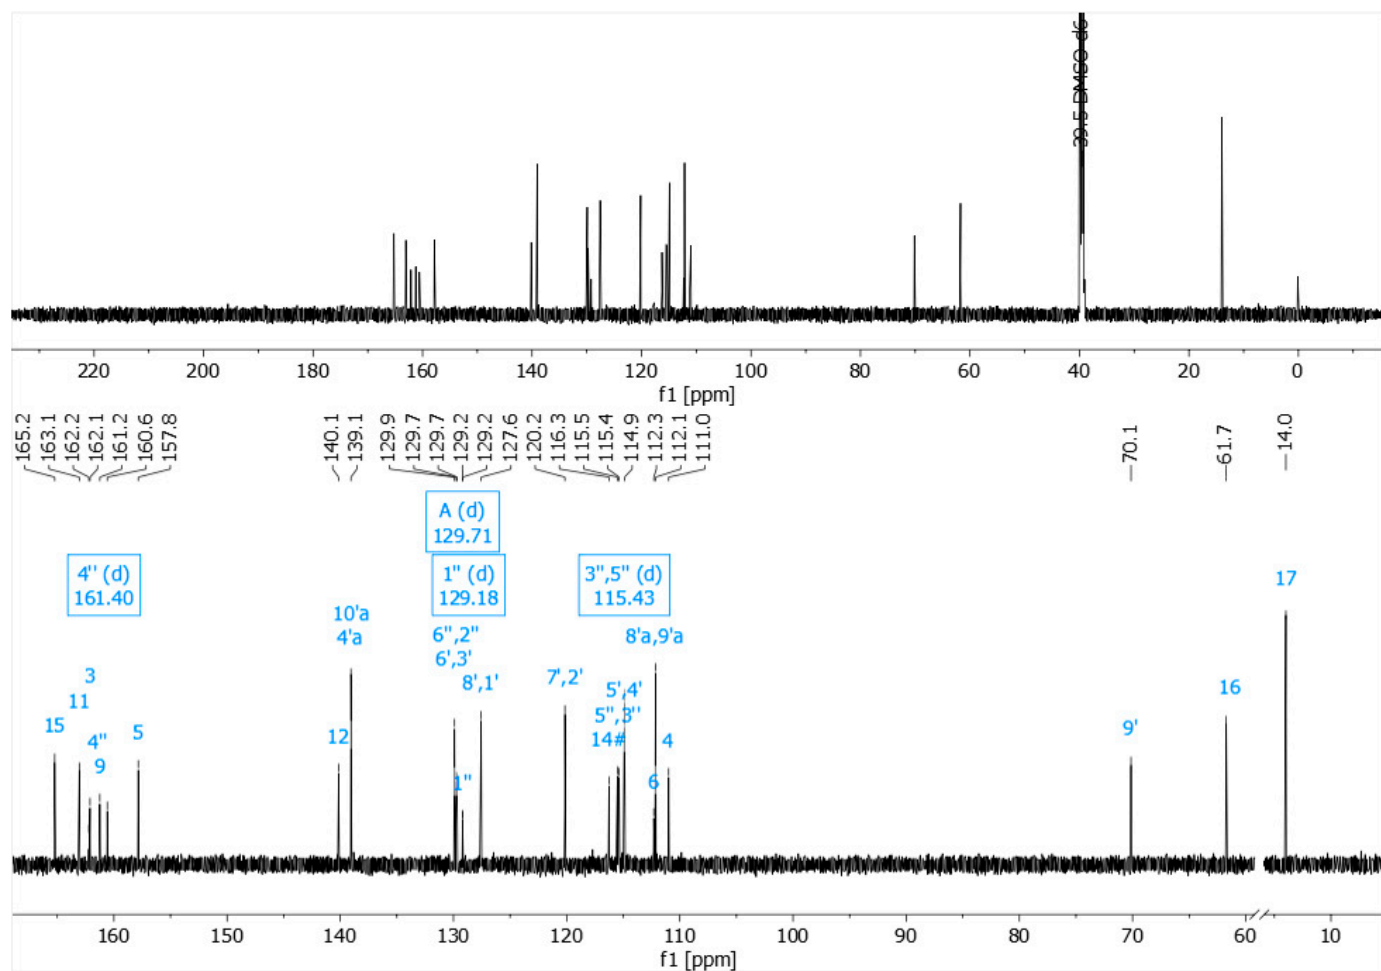

<sup>13</sup>C NMR (150 MHz, DMSO-d<sub>6</sub>) spectrum of derivative **8d**.

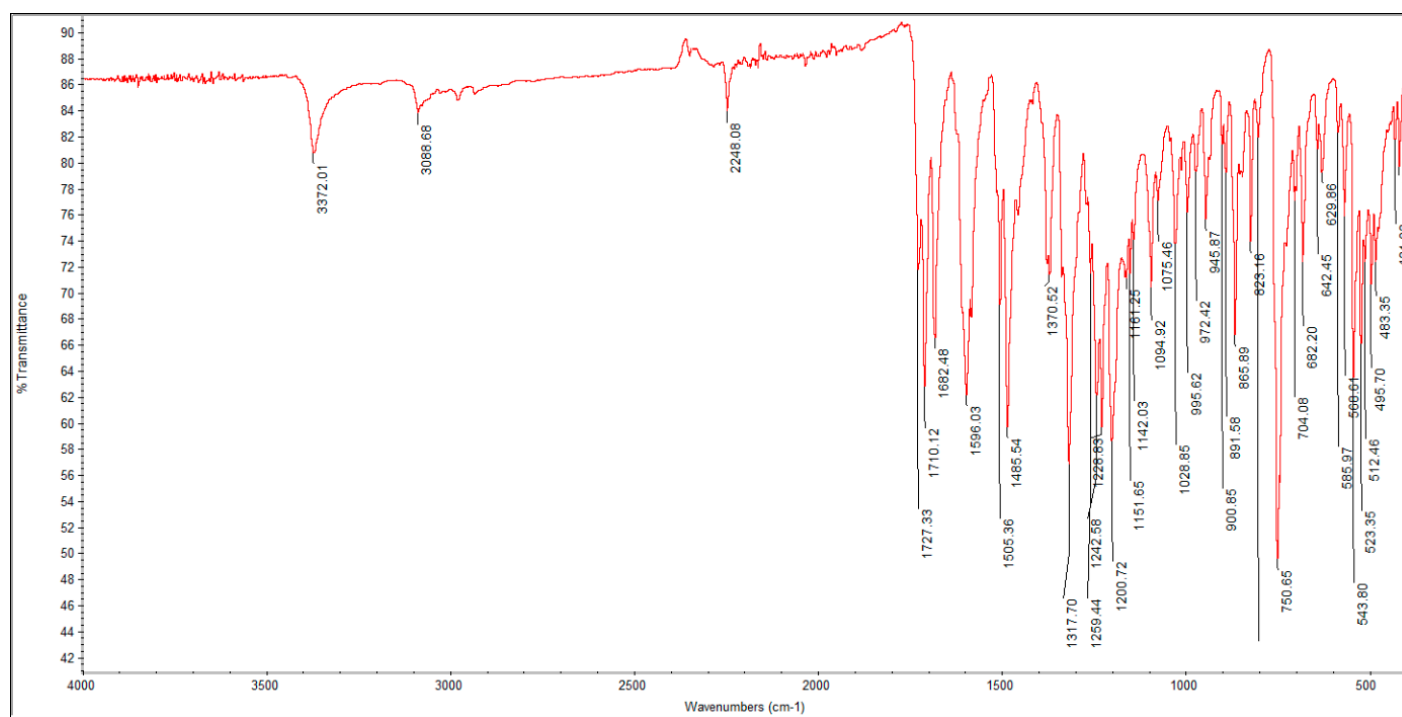

FTIR spectrum of derivative **8d**.

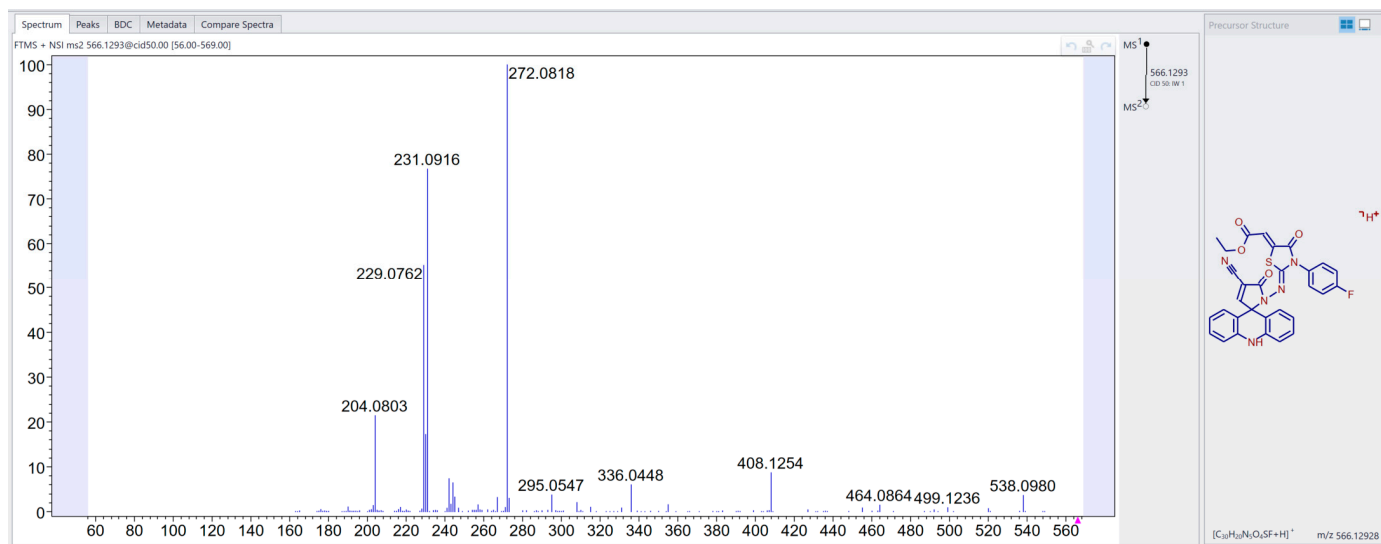

MS2 spectrum of derivative **8d**.

2.15 Ethyl 2-[(2Z,5Z)-2-({4'-cyano-5'-oxo-1',5'-dihydro-10H-spiro[acridine-9,2'-pyrrol]-1'-yl)imino)-3-(4-nitrophenyl)-4-oxo-1,3-thiazolidin-5-ylidene]acetate (**8e**)

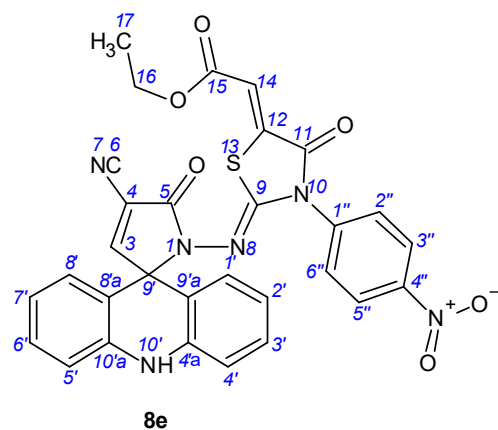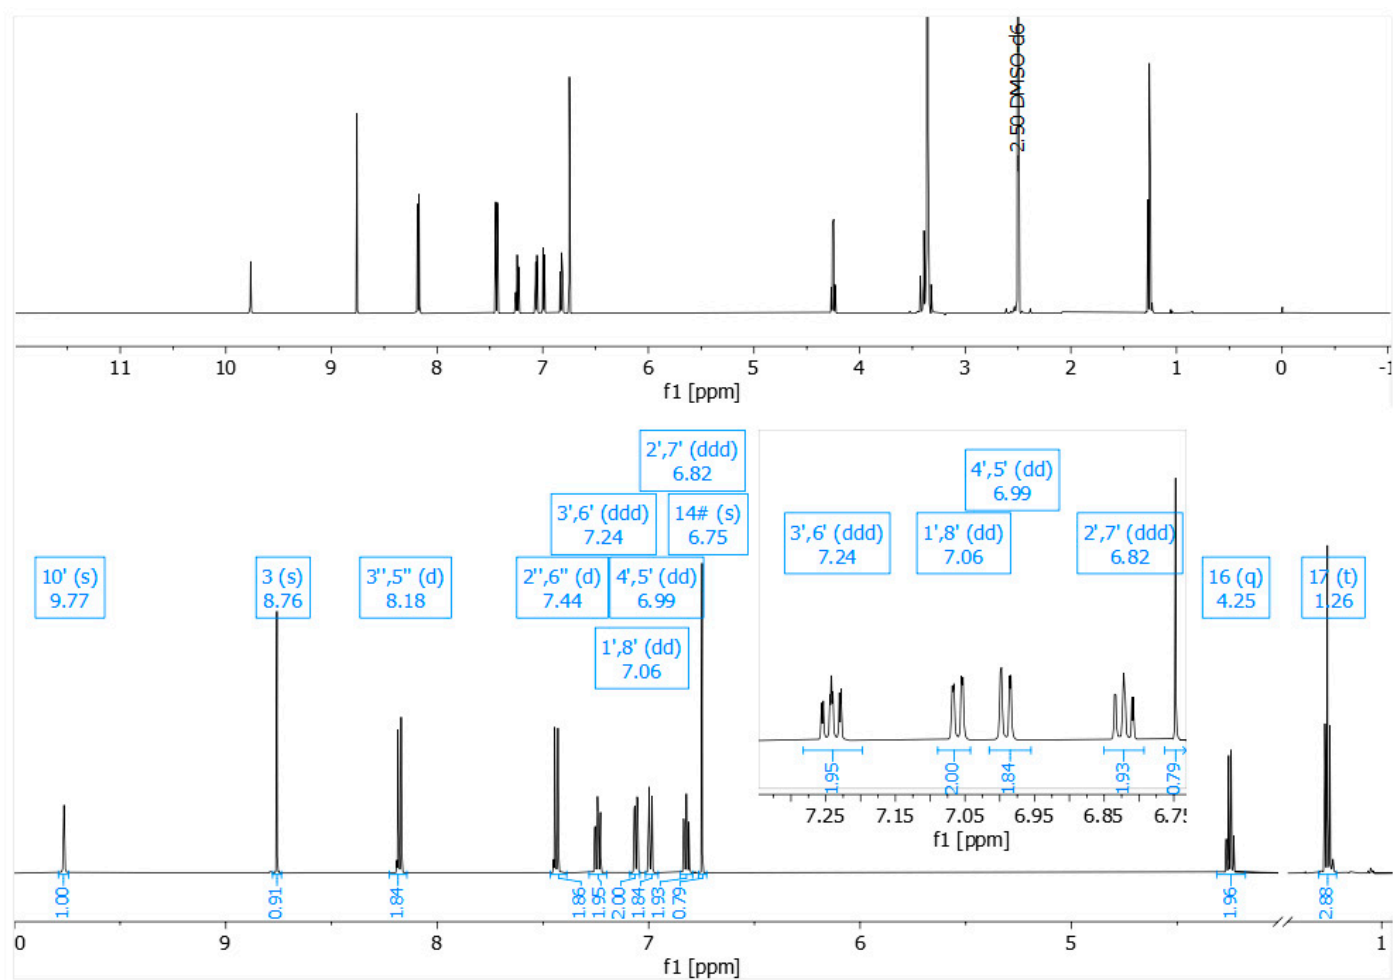

<sup>1</sup>H NMR (600 MHz, DMSO-d<sub>6</sub>) spectrum of derivative **8e**.

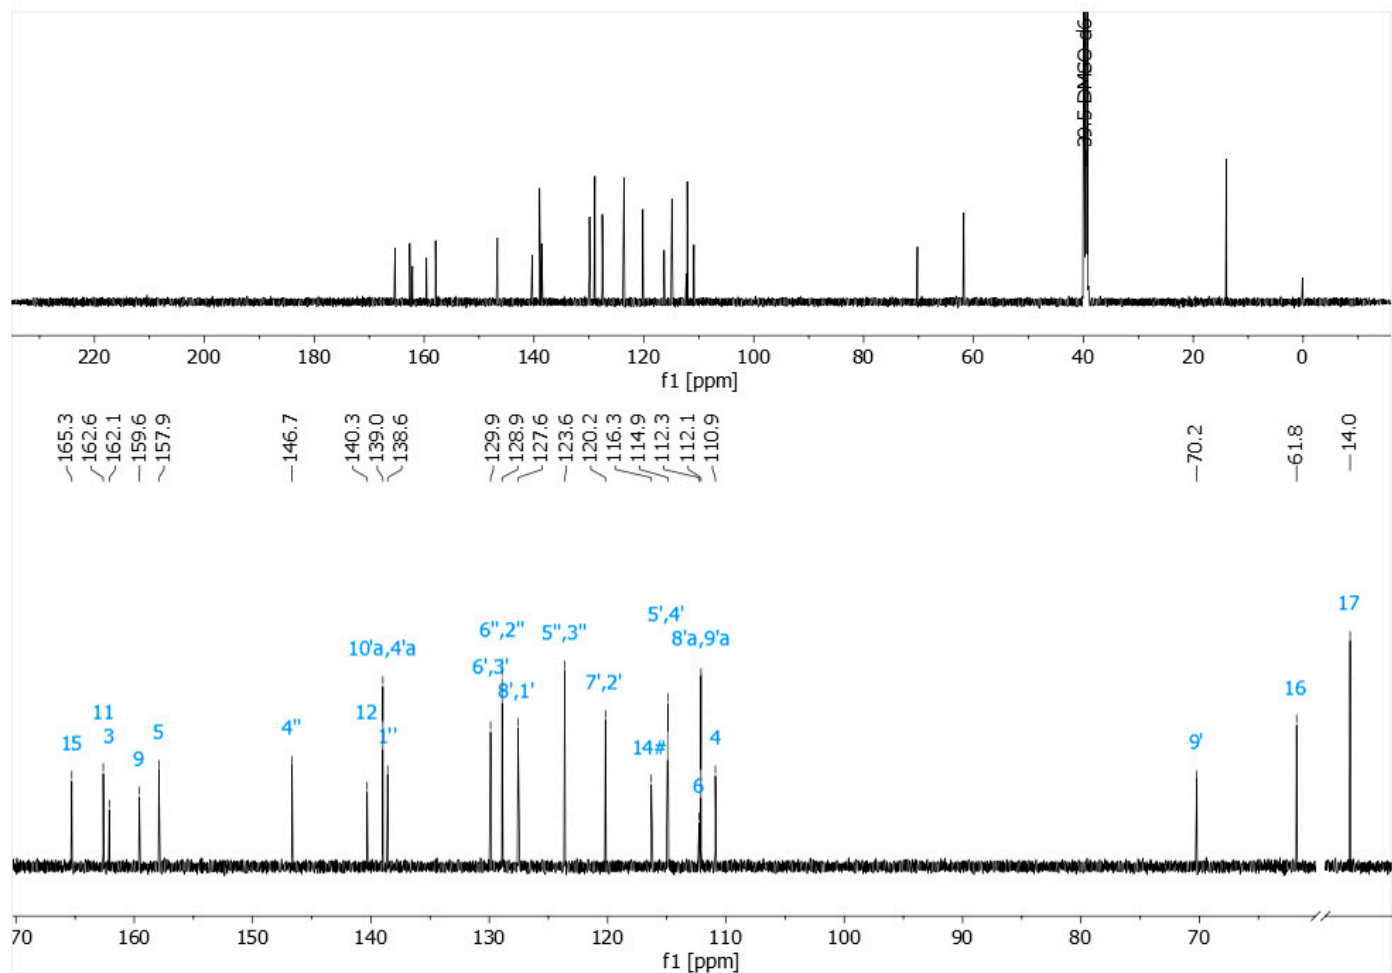

$^{13}\text{C}$  NMR (150 MHz,  $\text{DMSO-d}_6$ ) spectrum of derivative **8e**.

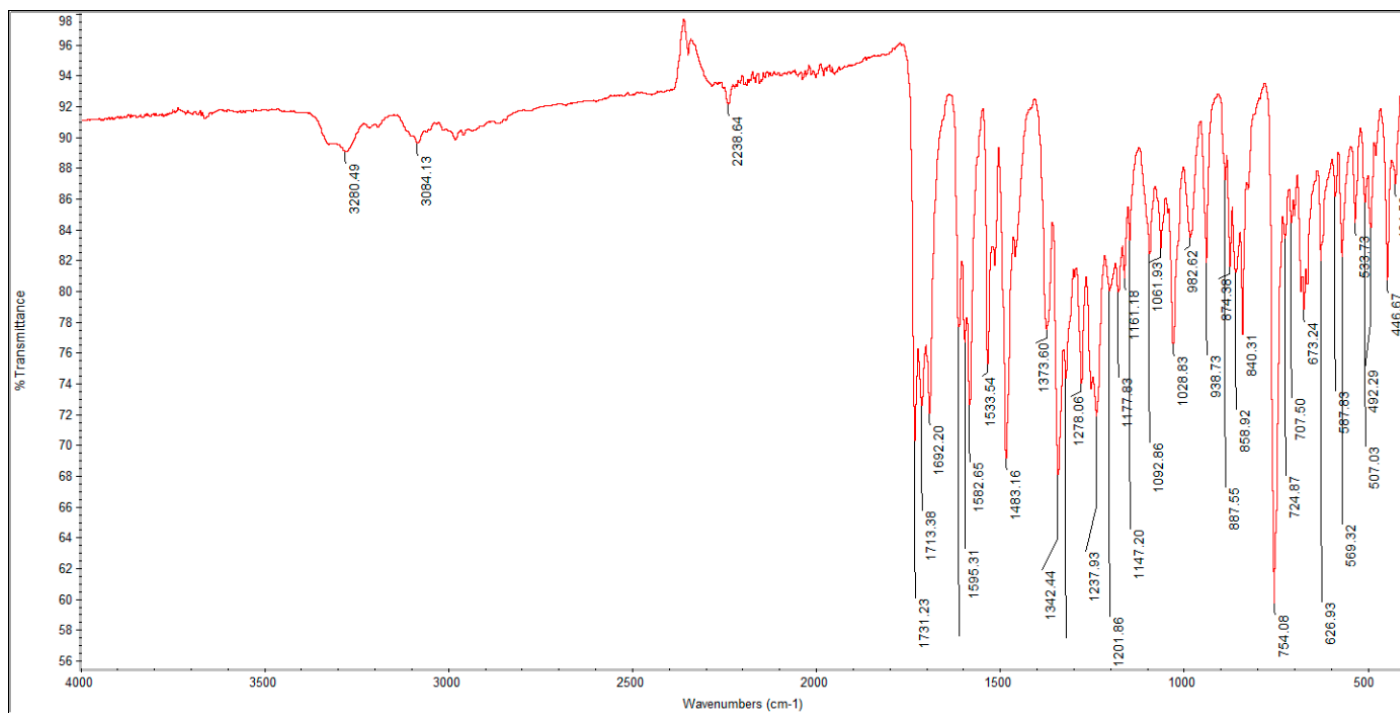

FTIR spectrum of derivative **8e**.



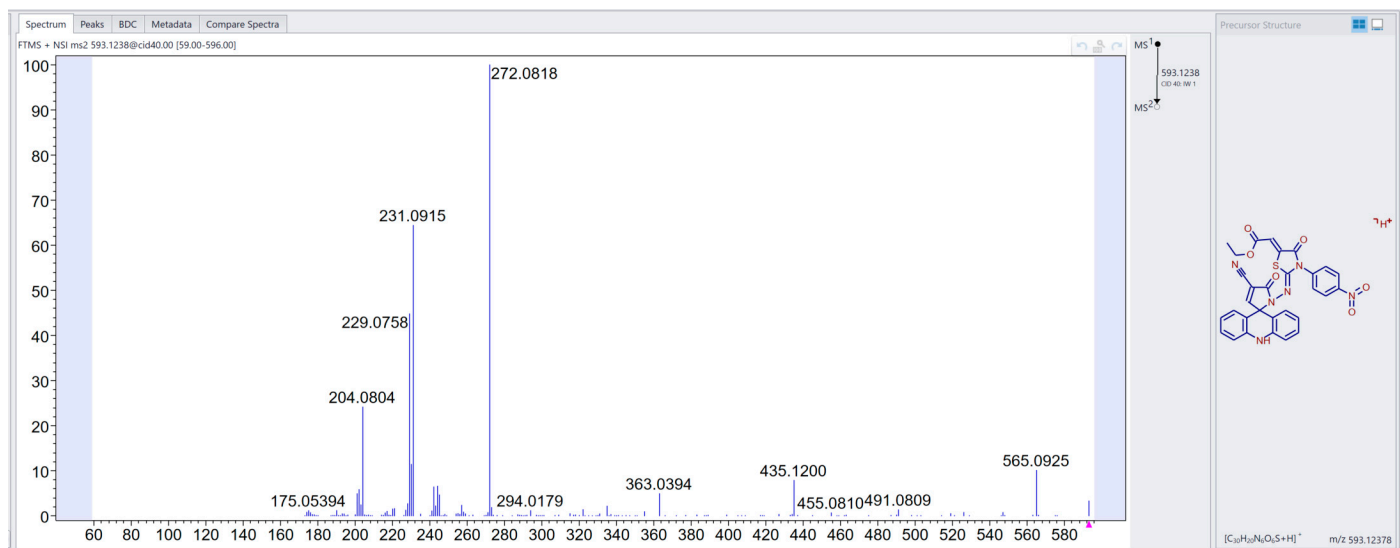

MS2 spectrum of derivative **8e**.

2.16 1'-{[(2Z)-5-Methyl-4-oxo-3-phenyl-1,3-thiazolidin-2-ylidene]amino}-5'-oxo-1',5'-dihydro-10H-spiro[acridine-9,2'-pyrrole]-4'-carbonitrile (**9a**)

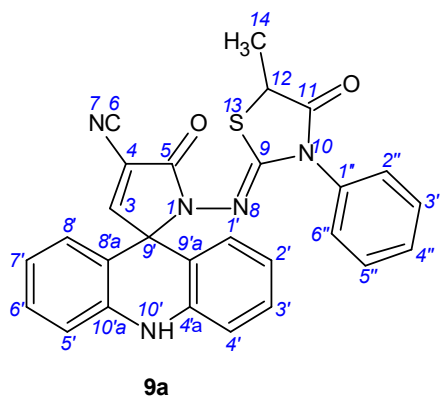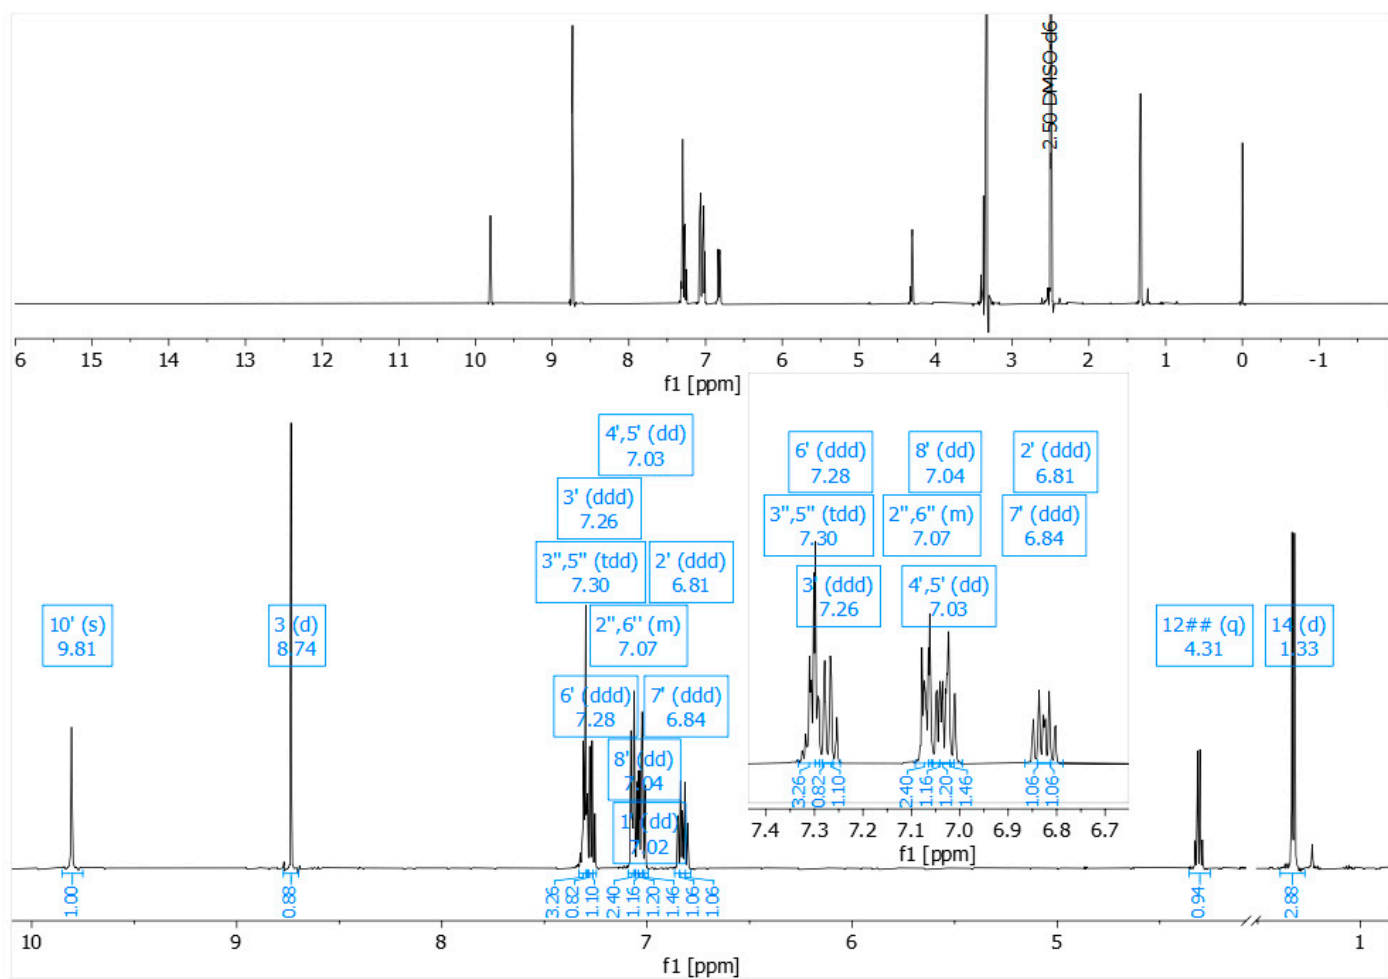

<sup>1</sup>H NMR (600 MHz, DMSO-d<sub>6</sub>) spectrum of derivative **9a**.

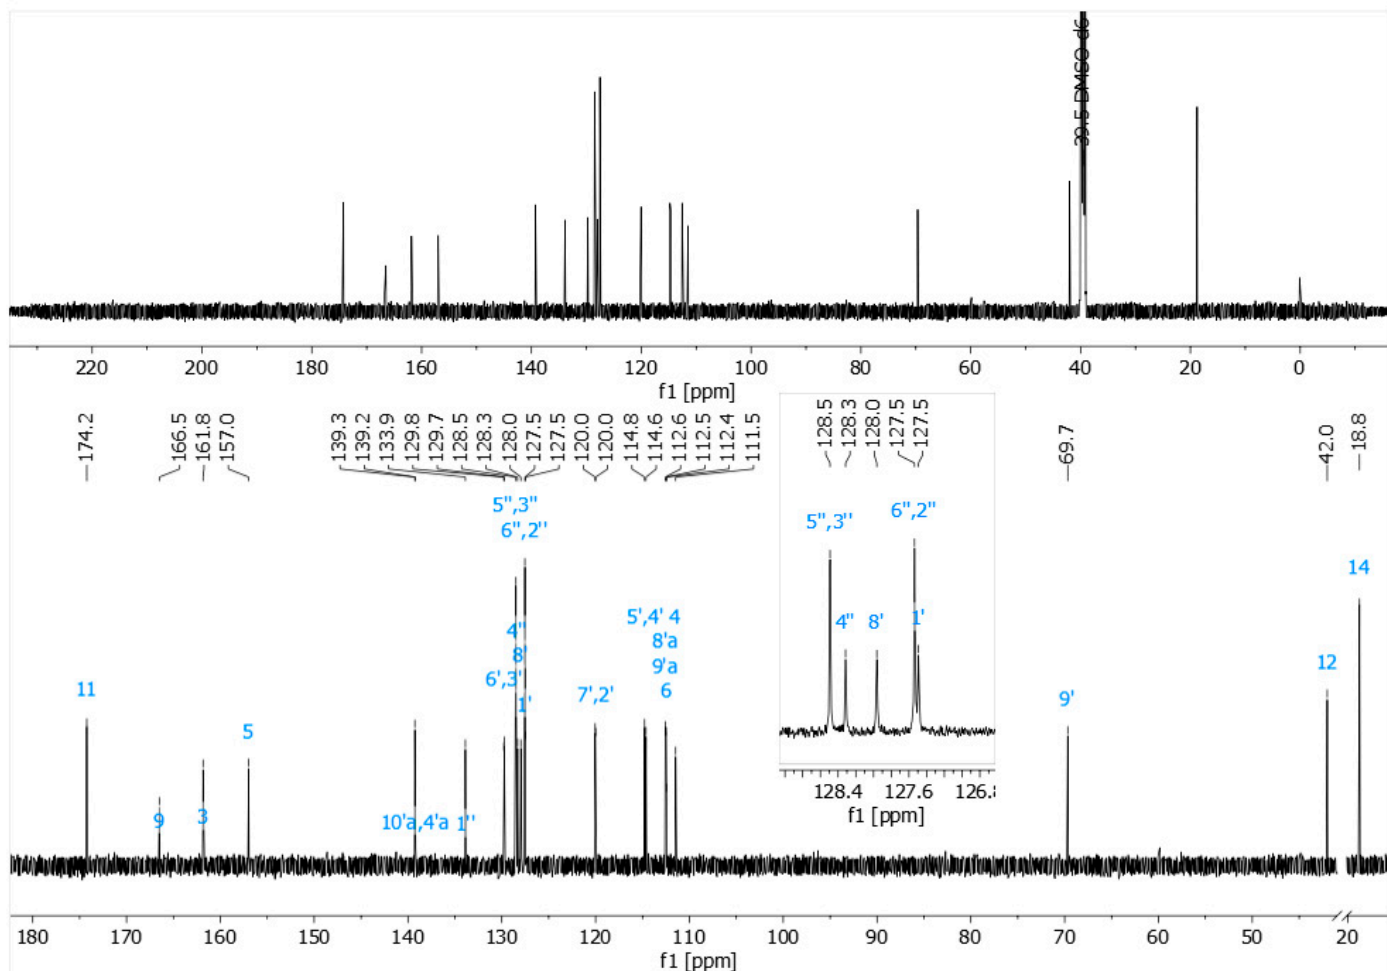

<sup>13</sup>C NMR (150 MHz, DMSO-d<sub>6</sub>) spectrum of derivative **9a**.

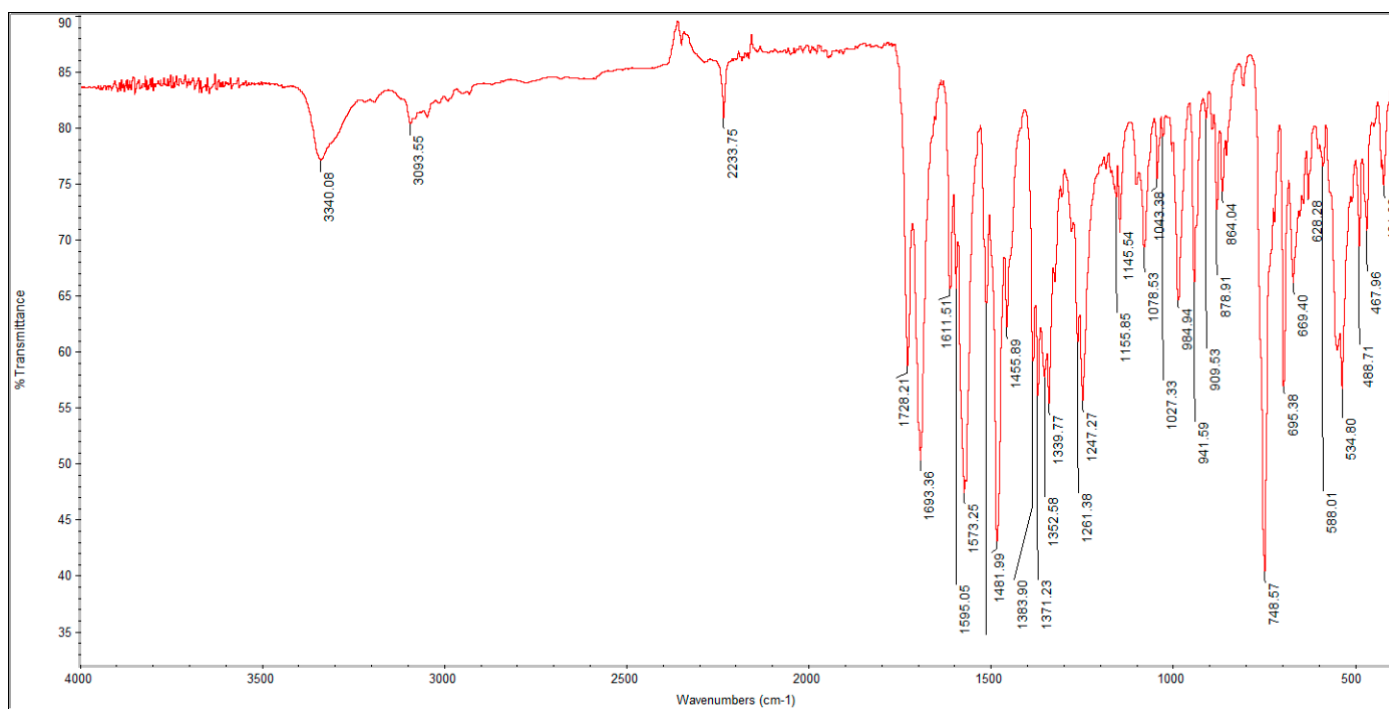

FTIR spectrum of derivative **9a**.

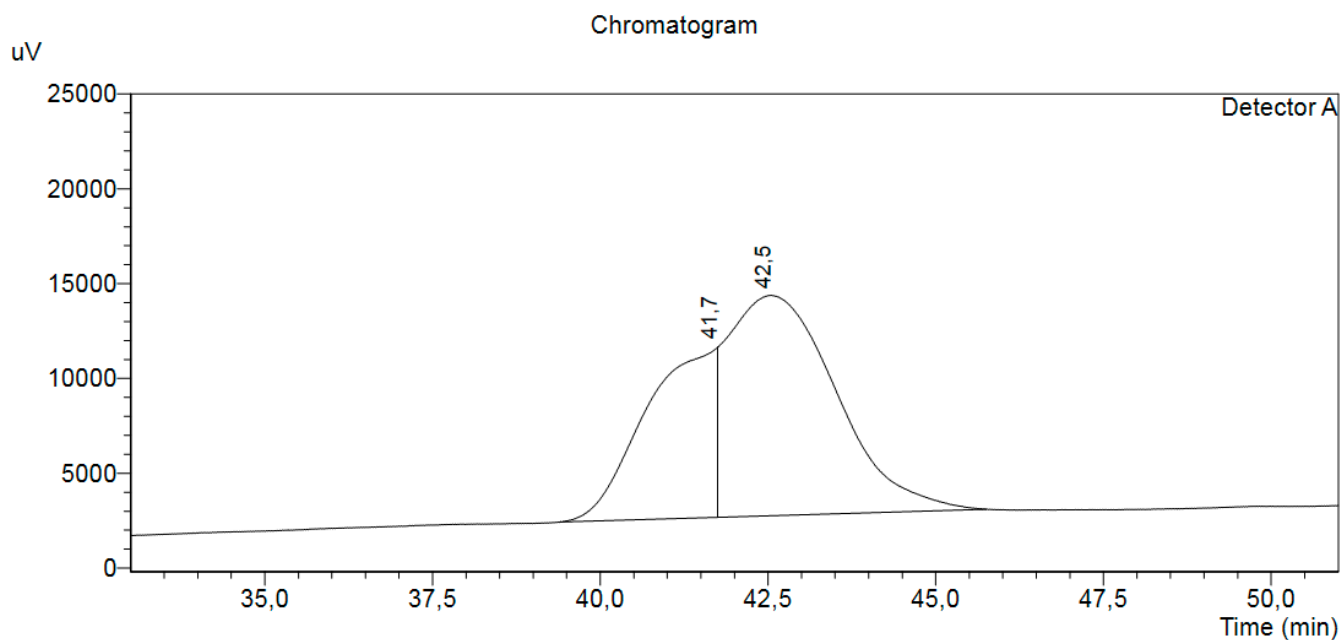

### <Peak Table>

Detector A

| Peak# | Ret. Time | Area    | Height | Conc.  | Unit | Area%   |
|-------|-----------|---------|--------|--------|------|---------|
| 1     | 41,746    | 653960  | 8950   | 33,533 |      | 33,533  |
| 2     | 42,544    | 1296223 | 11625  | 66,467 |      | 66,467  |
| Total |           | 1950183 | 20575  |        |      | 100,000 |

Chiral HPLC chromatogram of compound **9a**. Chiralpak IA column; flow rate of 0.5 mL/min; temperature 25 °C; *n*-hexane/acetone (75/25, v/v).

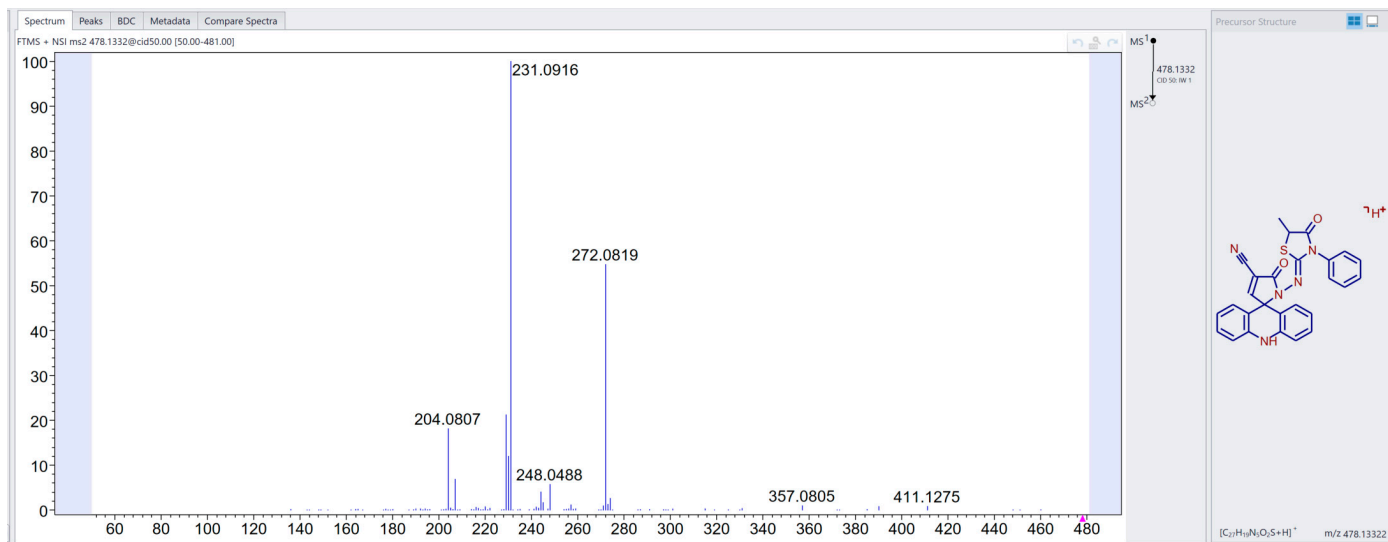

MS2 spectrum of derivative **9a**.

2.17 1'-{[(2Z)-3-(4-Methoxyphenyl)-5-methyl-4-oxo-1,3-thiazolidin-2-ylidene]amino}-5'-oxo-1',5'-dihydro-10*H*-spiro[acridine-9,2'-pyrrole]-4'-carbonitrile (**9b**)

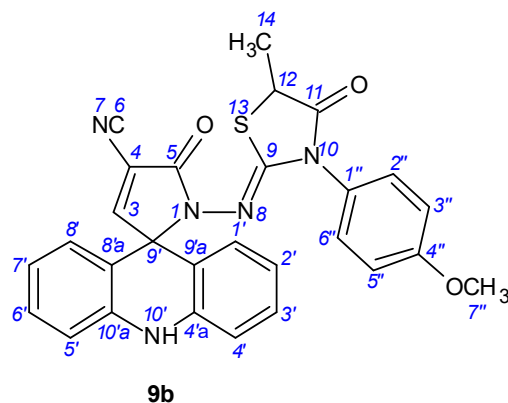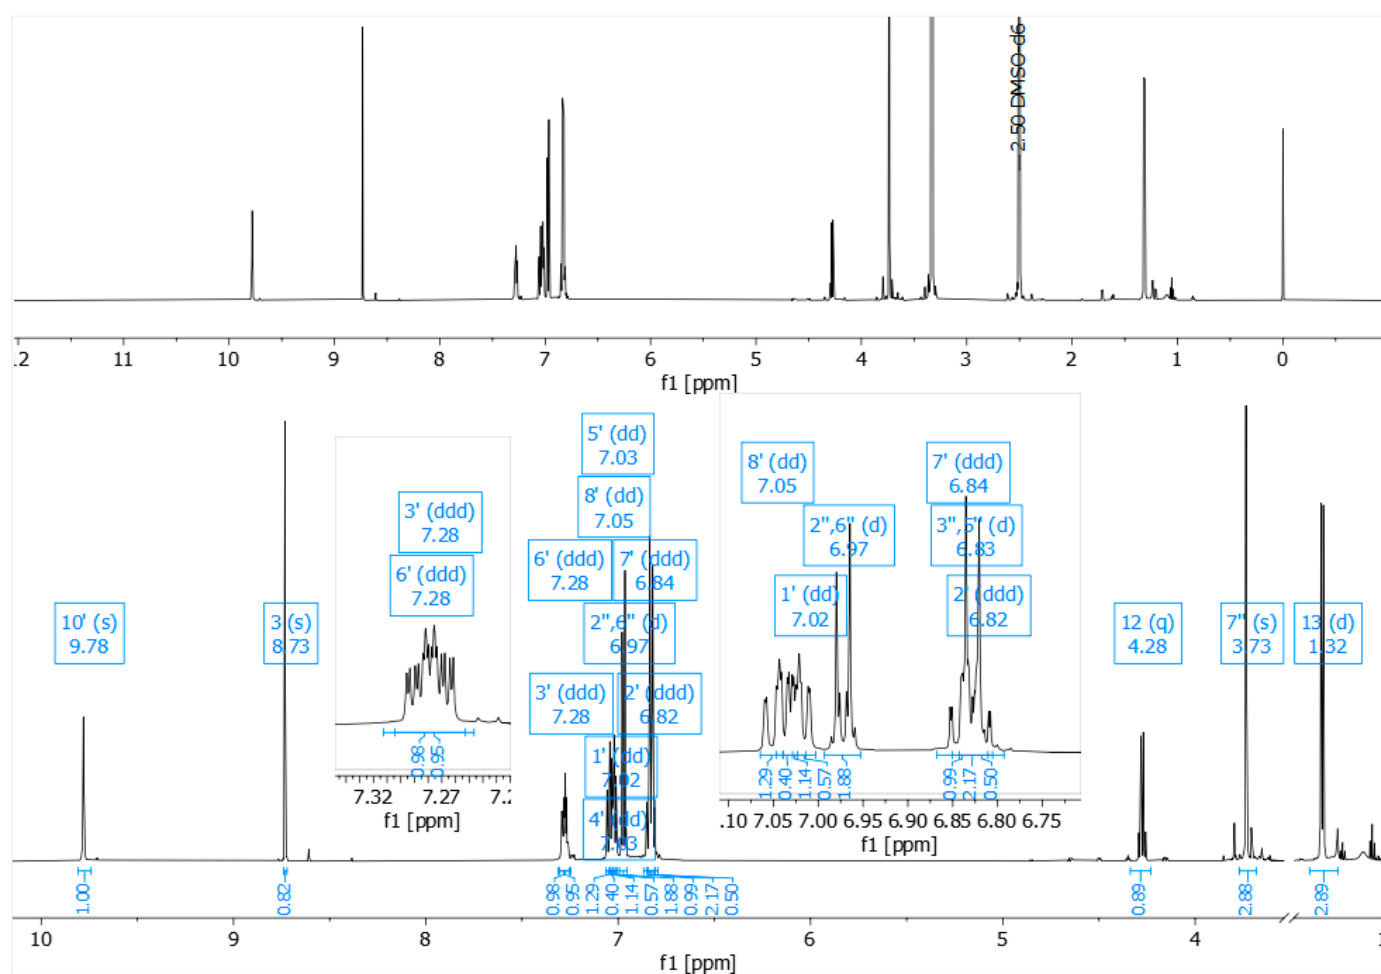

<sup>1</sup>H NMR (600 MHz, DMSO-d<sub>6</sub>) spectrum of derivative **9b**.

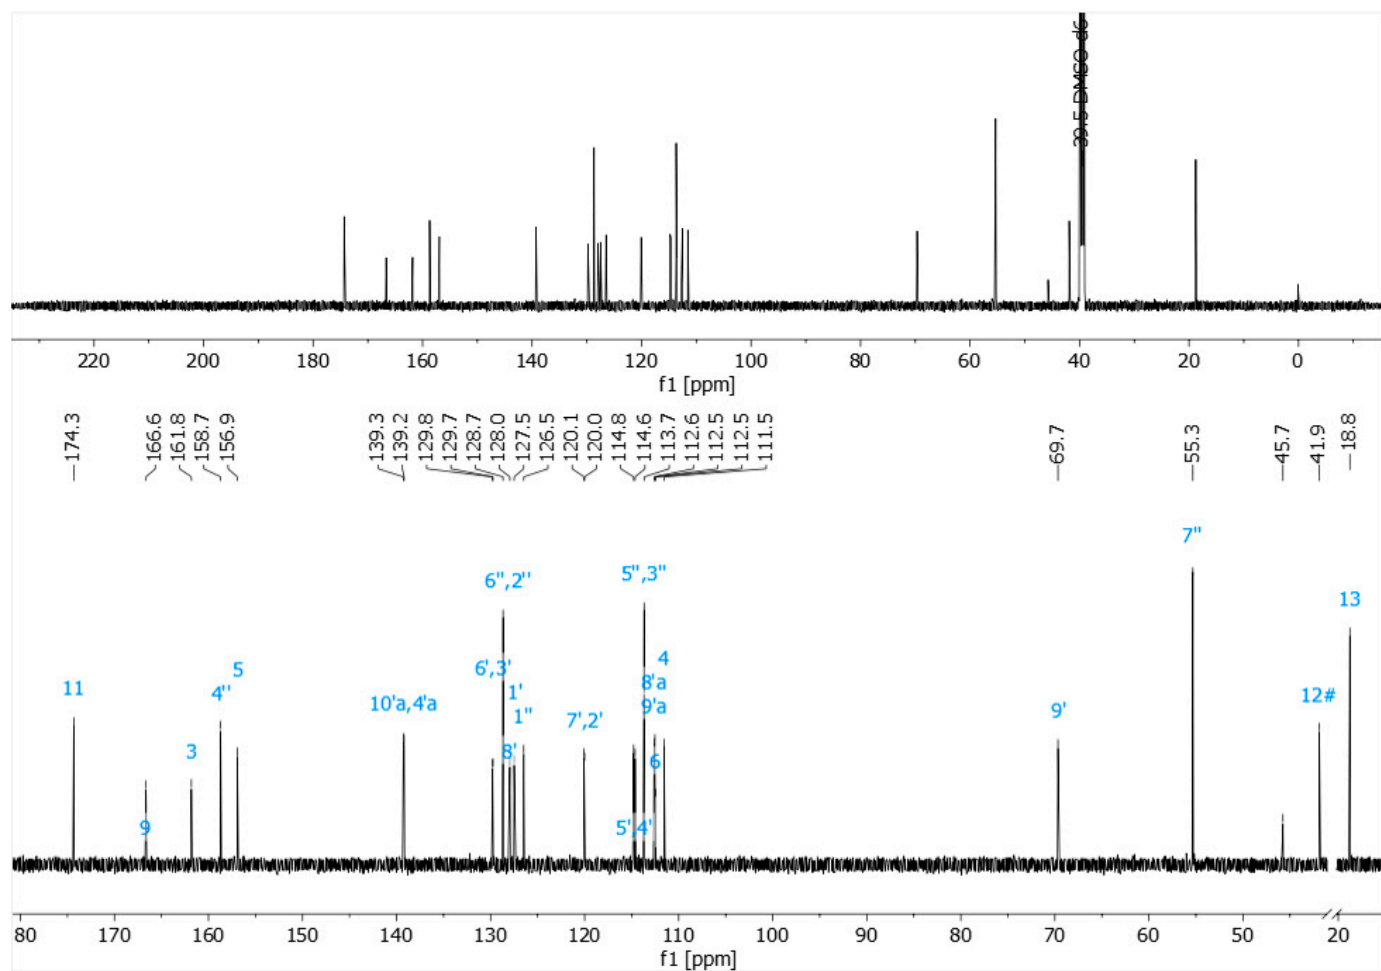

<sup>13</sup>C NMR (150 MHz, DMSO-d<sub>6</sub>) spectrum of derivative **9b**.

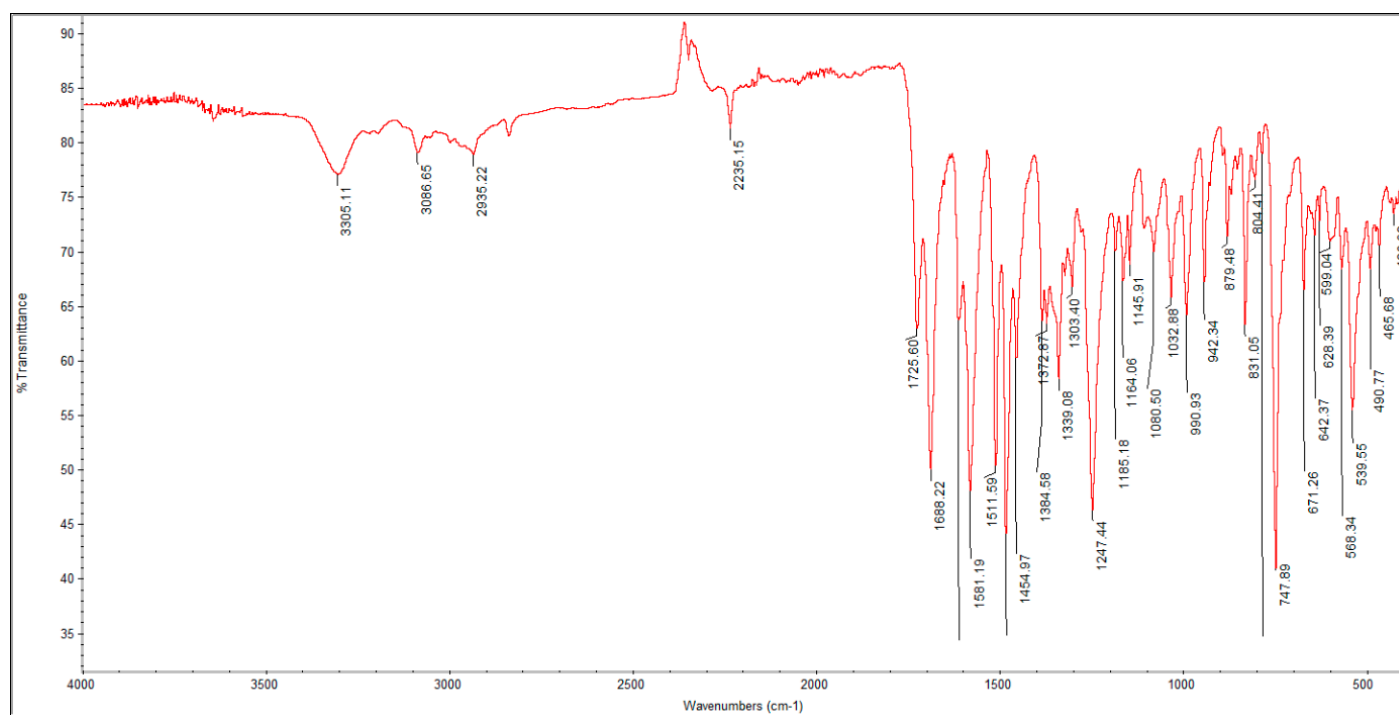

FTIR spectrum of derivative **9b**.

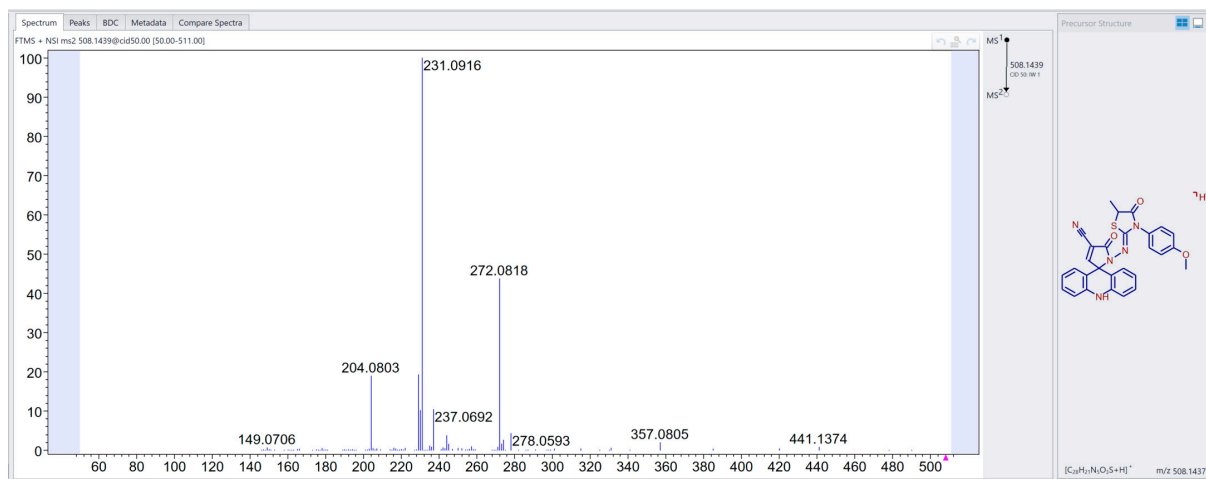

MS2 spectrum of derivative **9b**.

2.18 1'-{[(2Z)-3-(3-Methoxyphenyl)-5-methyl-4-oxo-1,3-thiazolidin-2-ylidene]amino}-5'-oxo-1',5'-dihydro-10H-spiro[acridine-9,2'-pyrrole]-4'-carbonitrile (**9c**)

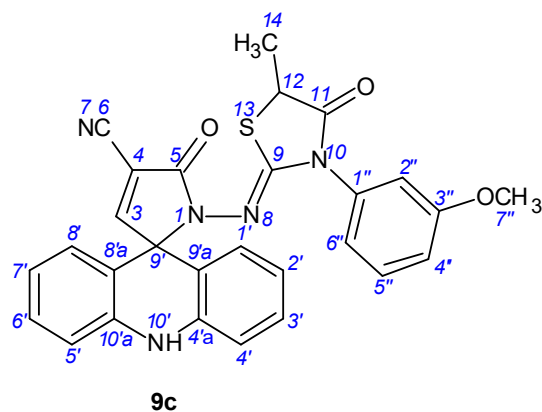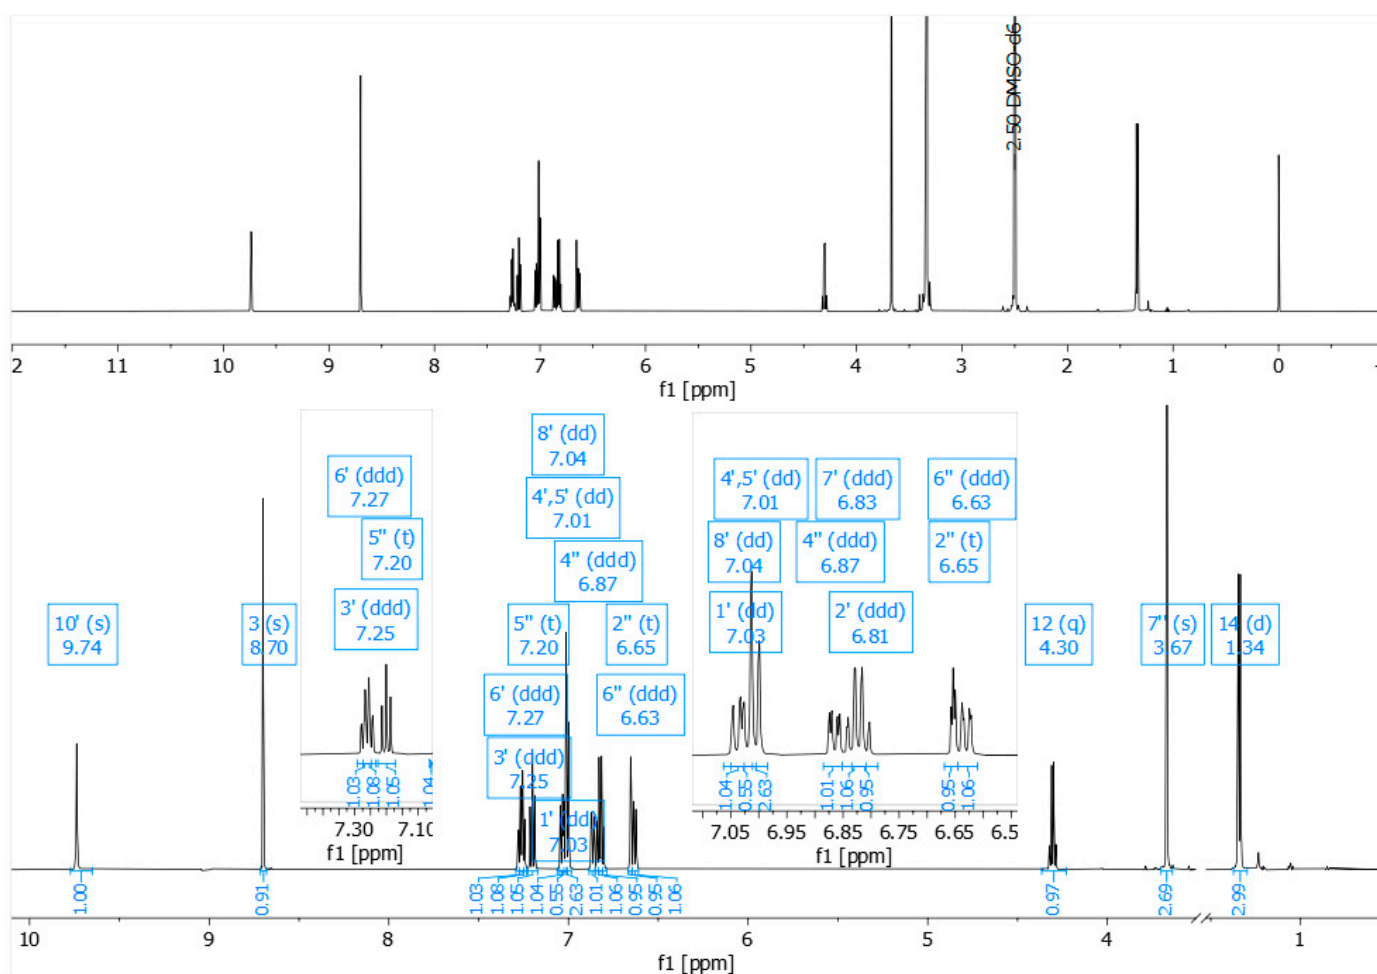



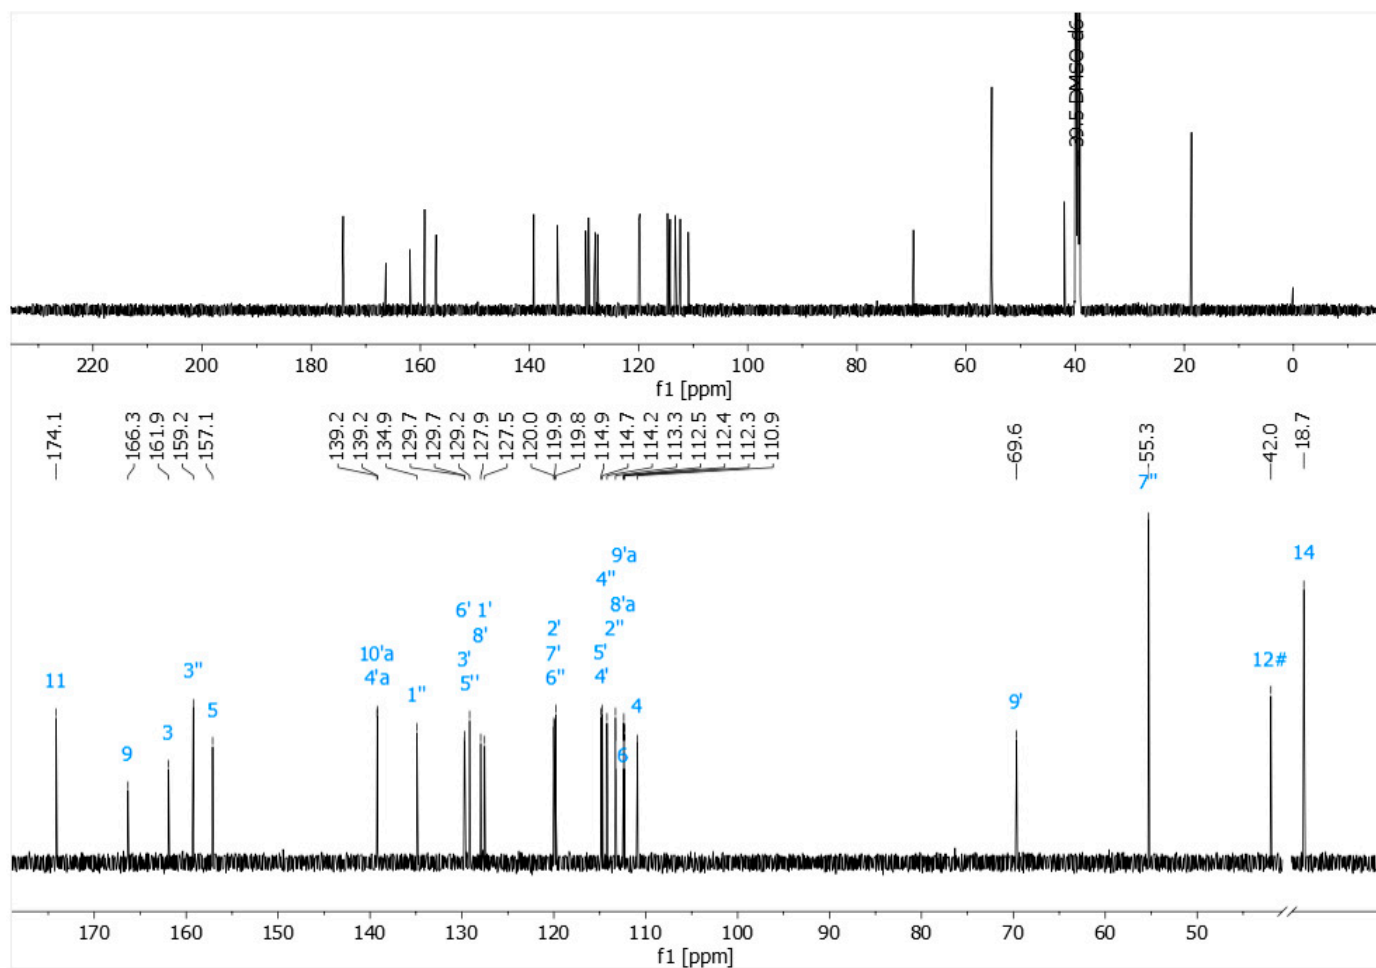

<sup>13</sup>C NMR (150 MHz, DMSO-d<sub>6</sub>) spectrum of derivative **9c**.

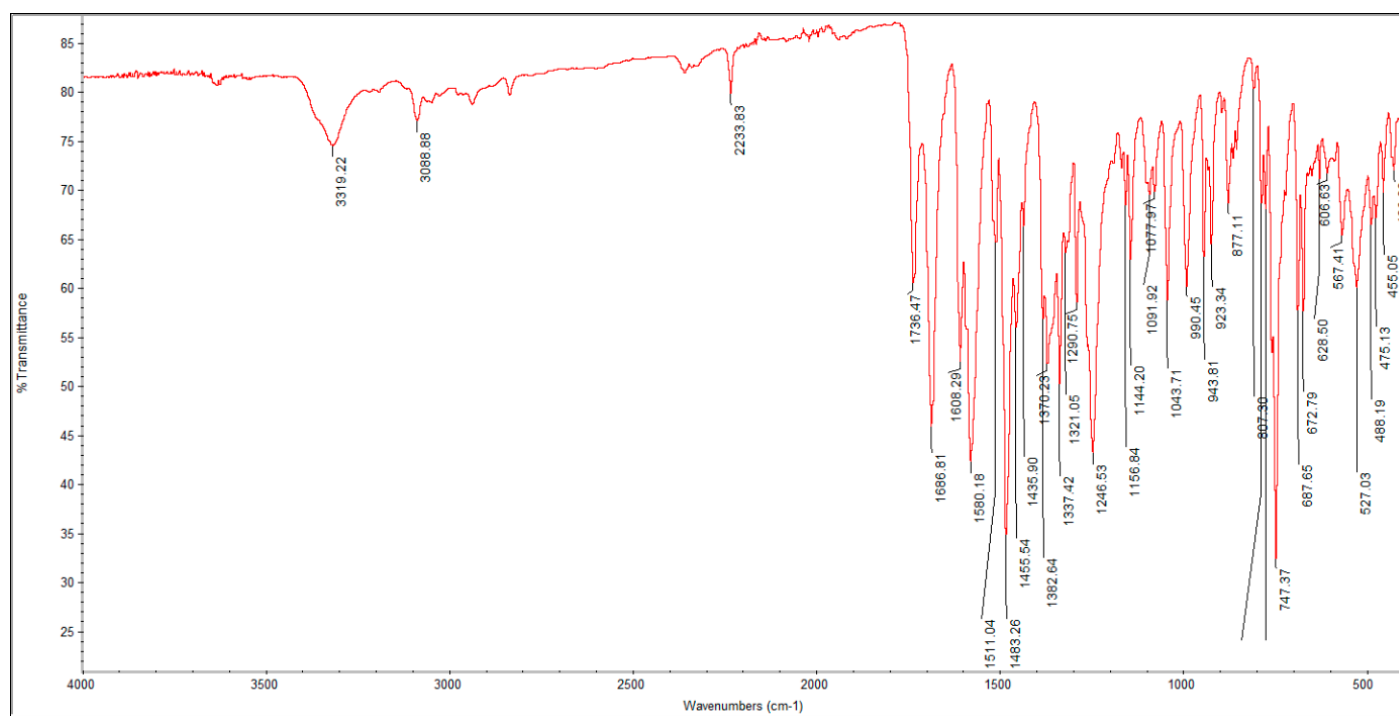

FTIR spectrum of derivative **9c**.

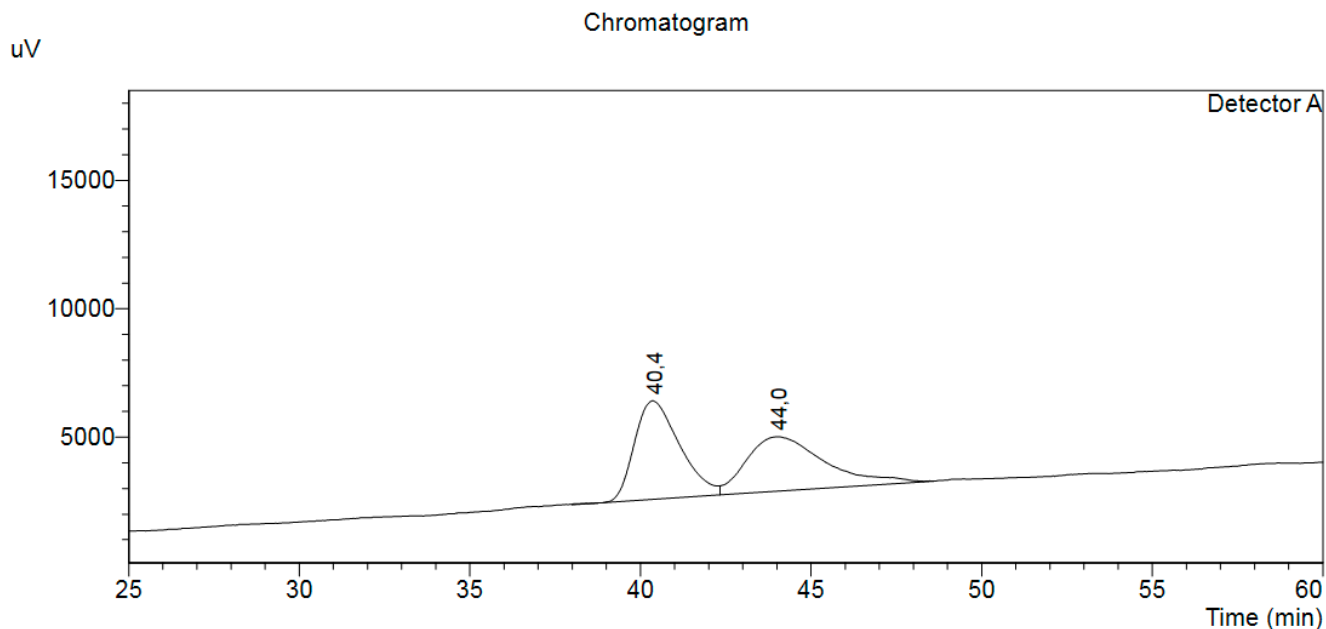

### <Peak Table>

Detector A

| Peak# | Ret. Time | Area   | Height | Conc.  | Unit | Area%   |
|-------|-----------|--------|--------|--------|------|---------|
| 1     | 40,382    | 354177 | 3687   | 51,012 |      | 51,012  |
| 2     | 44,023    | 340130 | 2090   | 48,988 |      | 48,988  |
| Total |           | 694306 | 5777   |        |      | 100,000 |

Chiral HPLC chromatogram of compound **9c**. Chiralpak IA column; flow rate of 0.5 mL/min; temperature 25 °C; *n*-hexane/acetone (85/15, v/v)

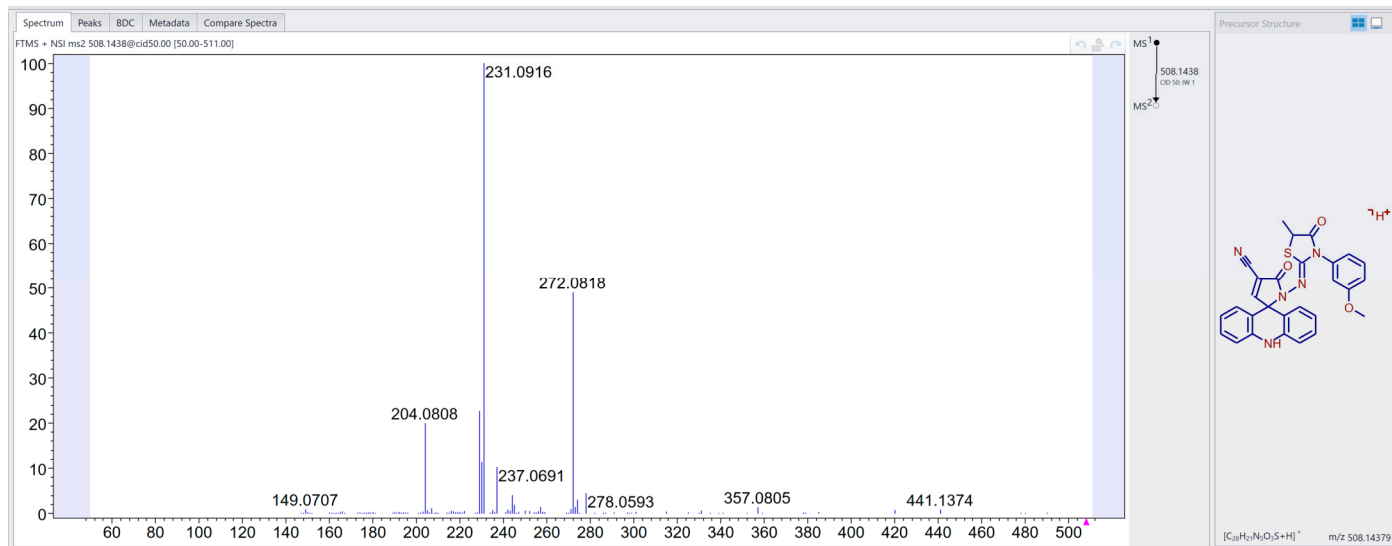

MS2 spectrum of derivative **9c**.

2.19 1'-{[(2Z)-3-(4-Fluorophenyl)-5-methyl-4-oxo-1,3-thiazolidin-2-ylidene]amino}-5'-oxo-1',5'-dihydro-10H-spiro[acridine-9,2'-pyrrole]-4'-carbonitrile (**9d**)

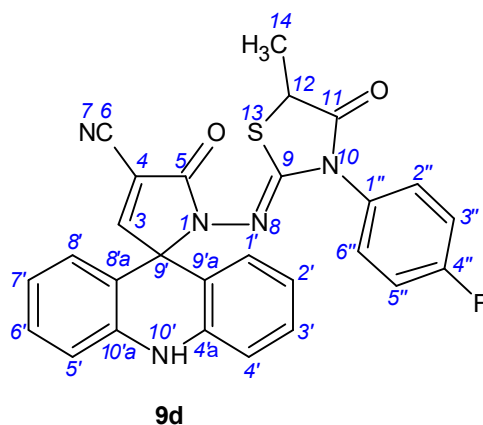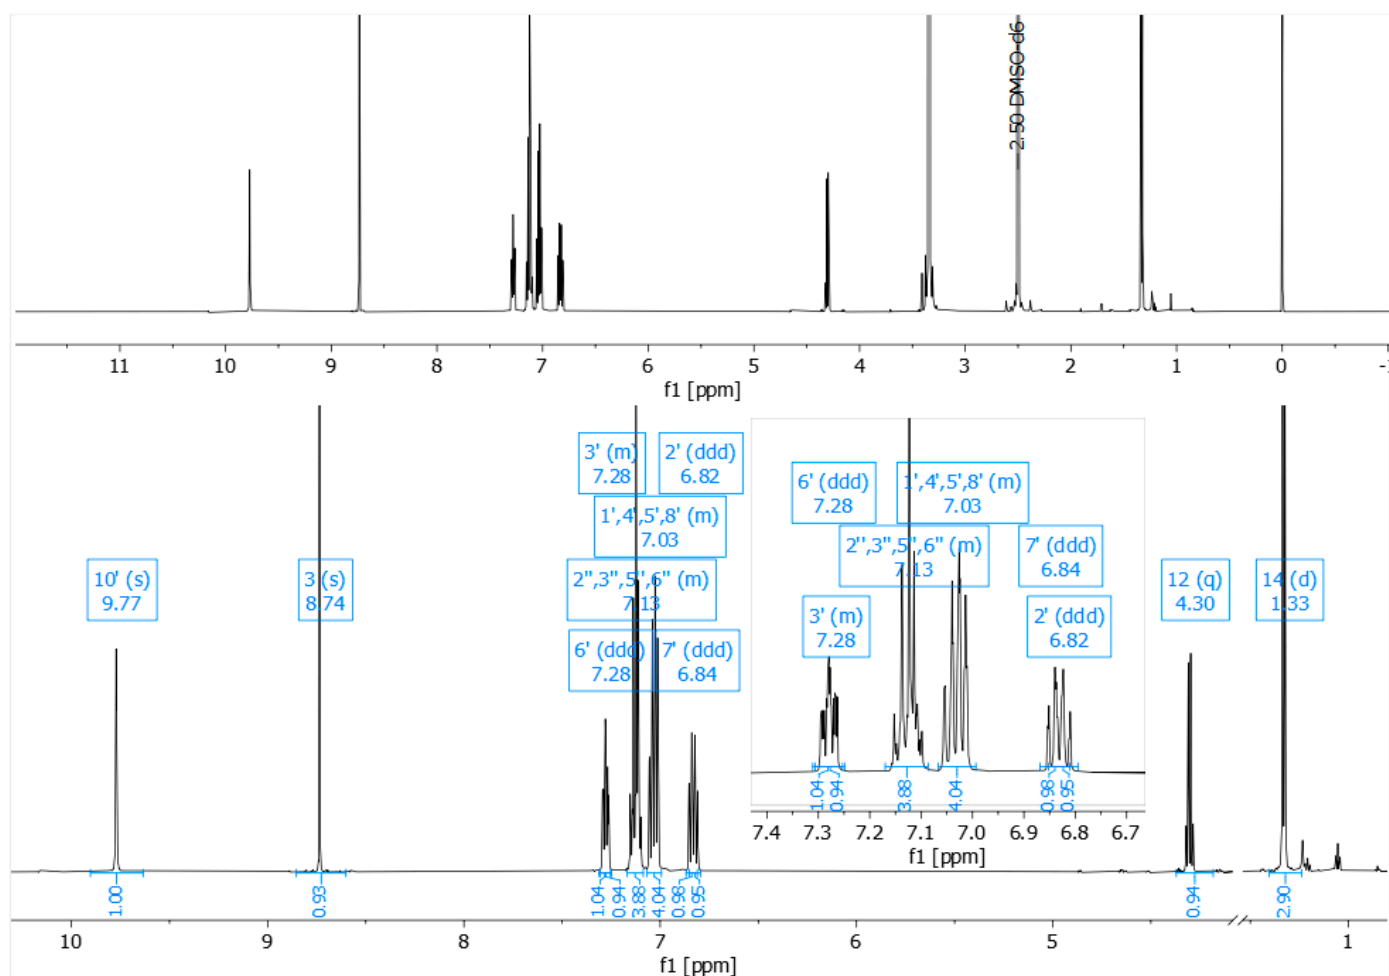

<sup>1</sup>H NMR (600 MHz, DMSO-d<sub>6</sub>) spectrum of derivative **9d**.

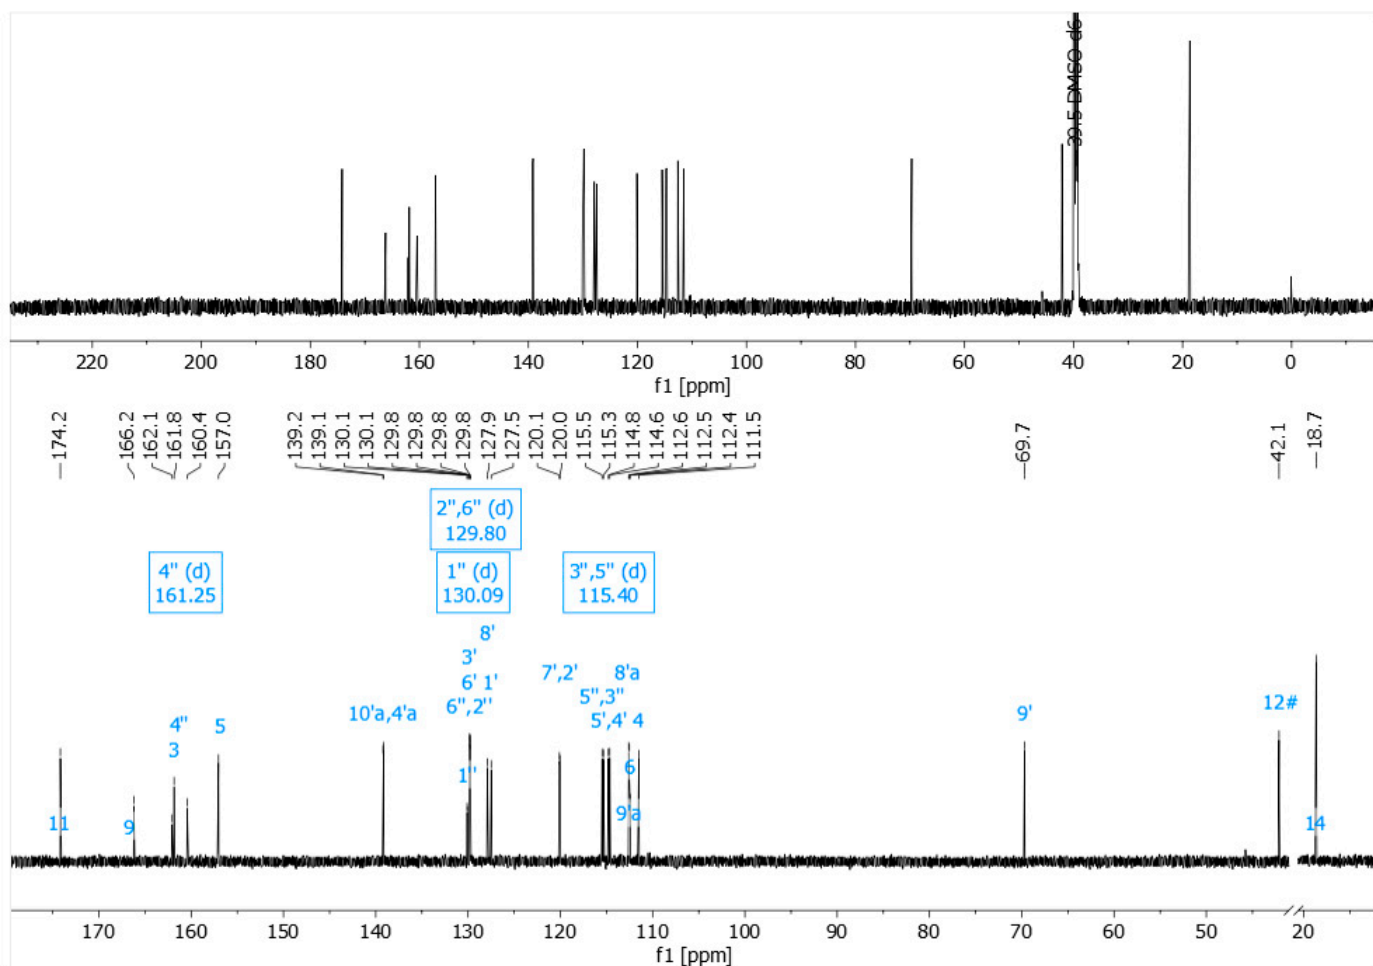

**<sup>13</sup>C NMR (150 MHz, DMSO-d<sub>6</sub>) spectrum of derivative 9d.**

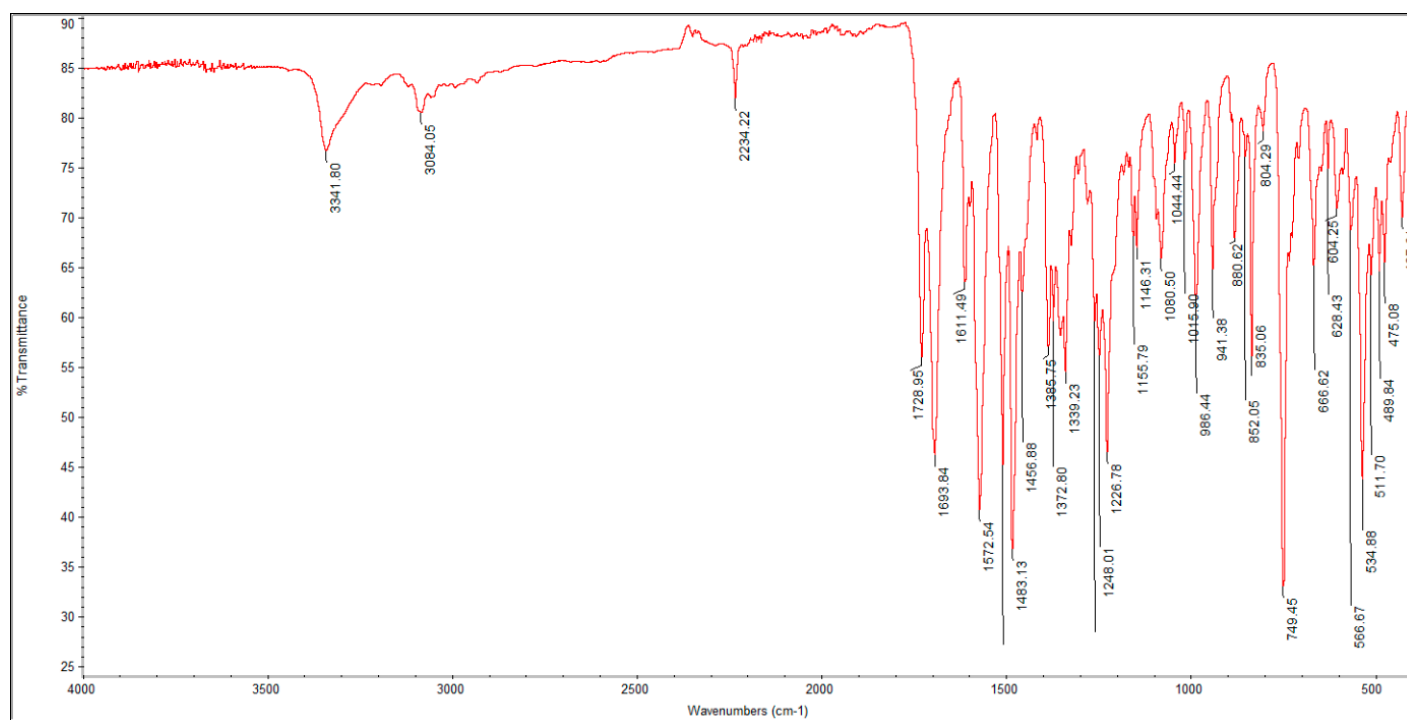

**FTIR spectrum of derivative 9d.**

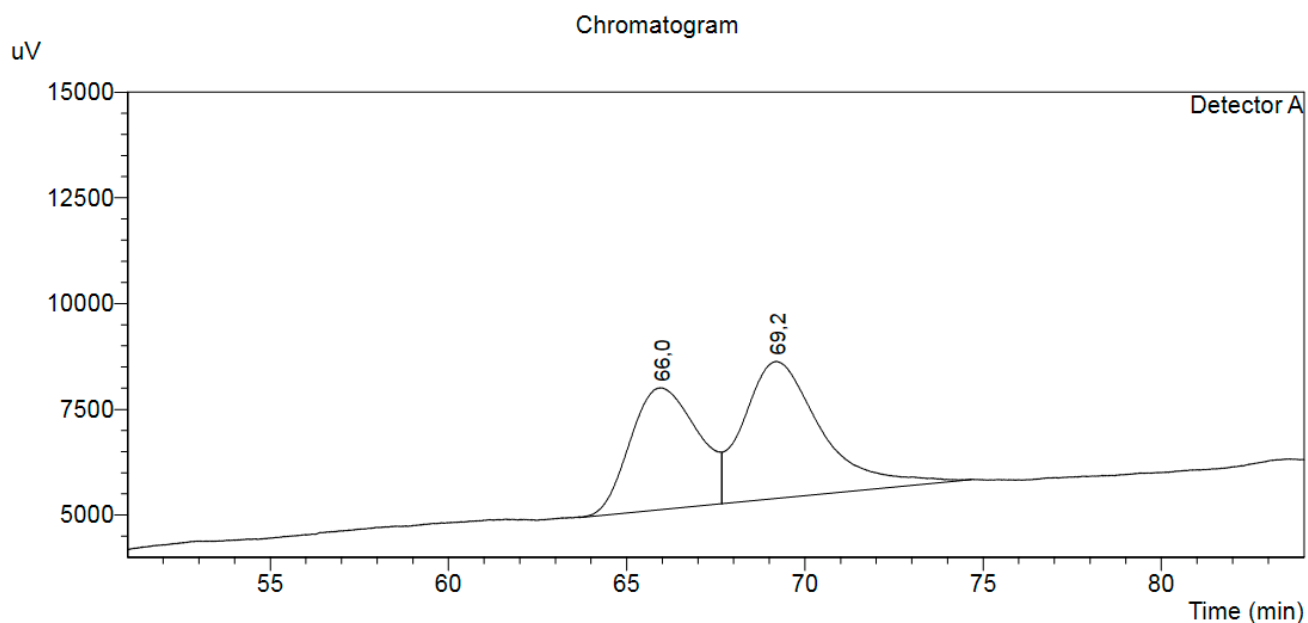

### <Peak Table>

Detector A

| Peak# | Ret. Time | Area   | Height | Conc.  | Unit | Mark | Name |
|-------|-----------|--------|--------|--------|------|------|------|
| 1     | 65,962    | 378532 | 2841   | 43,368 |      |      |      |
| 2     | 69,209    | 494304 | 3215   | 56,632 |      | V    |      |
| Total |           | 872835 | 6056   |        |      |      |      |

Chiral HPLC chromatogram of compound **9d**. Chiralpak IA column; flow rate of 0.5 mL/min; temperature 25 °C; *n*-hexane/acetone (85/15, v/v)

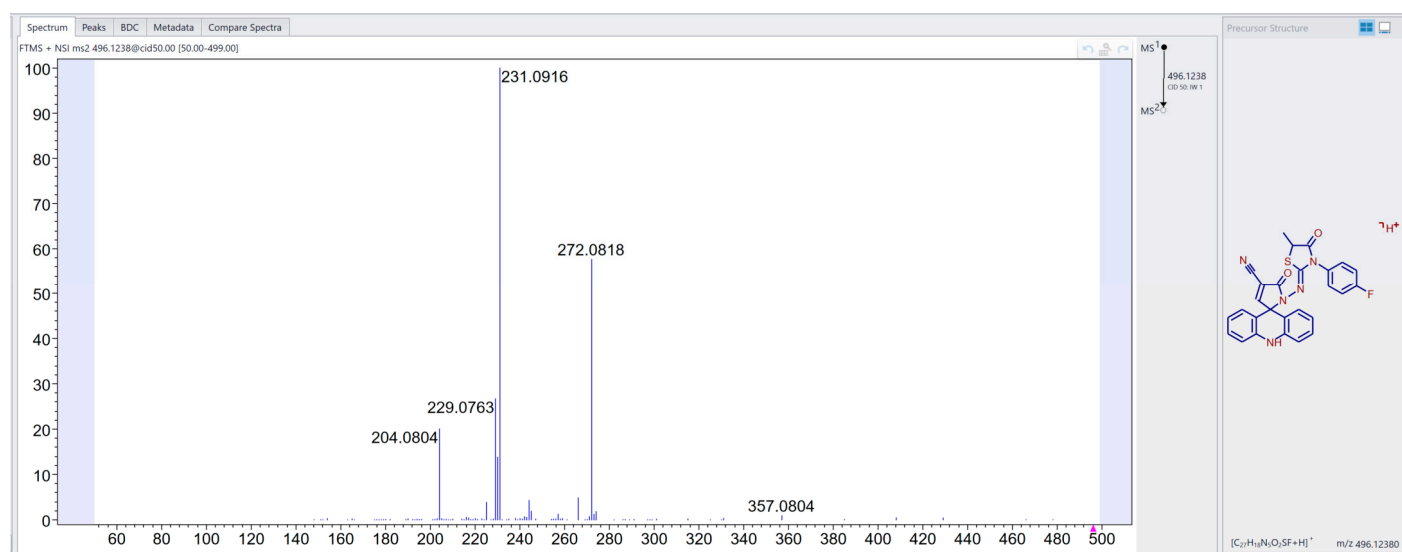

MS2 spectrum of derivative **9d**.

2.20 1'-{[(2Z)-5-Methyl-3-(4-nitrophenyl)-4-oxo-1,3-thiazolidin-2-ylidene]amino}-5'-oxo-1',5'-dihydro-10*H*-spiro[acridine-9,2'-pyrrole]-4'-carbonitrile (**9e**)

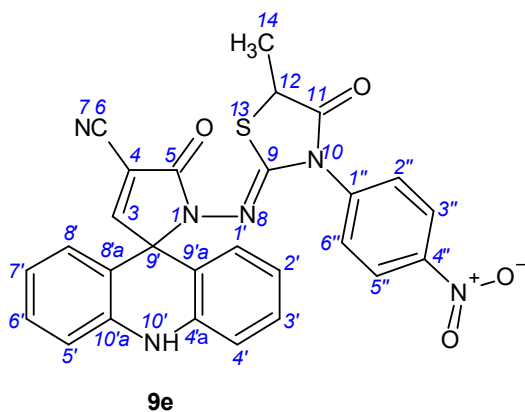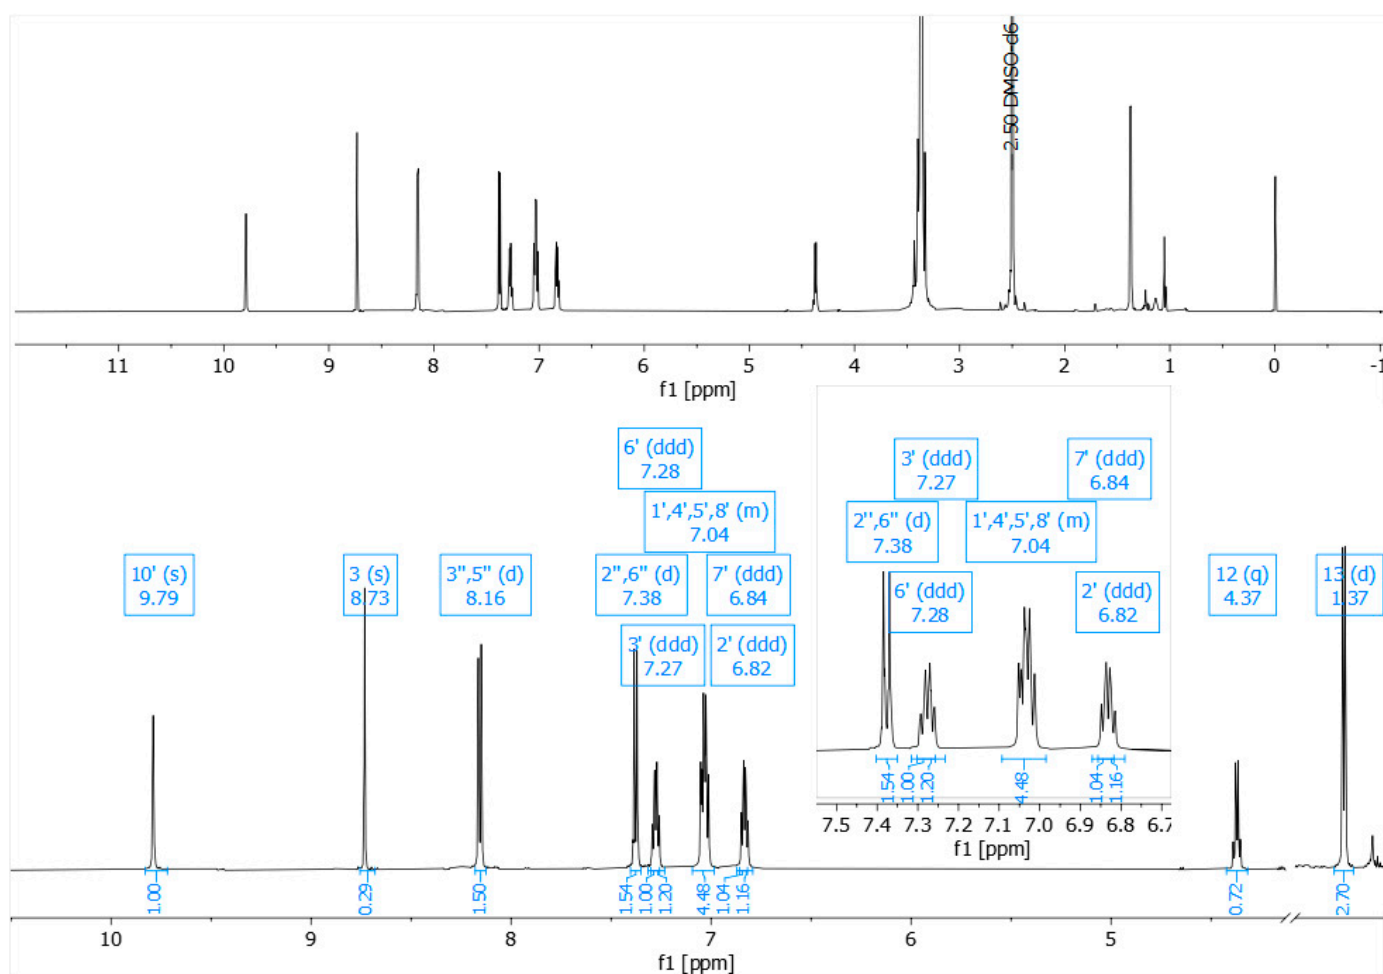

<sup>1</sup>H NMR (600 MHz, DMSO-d<sub>6</sub>) spectrum of derivative **9e**.

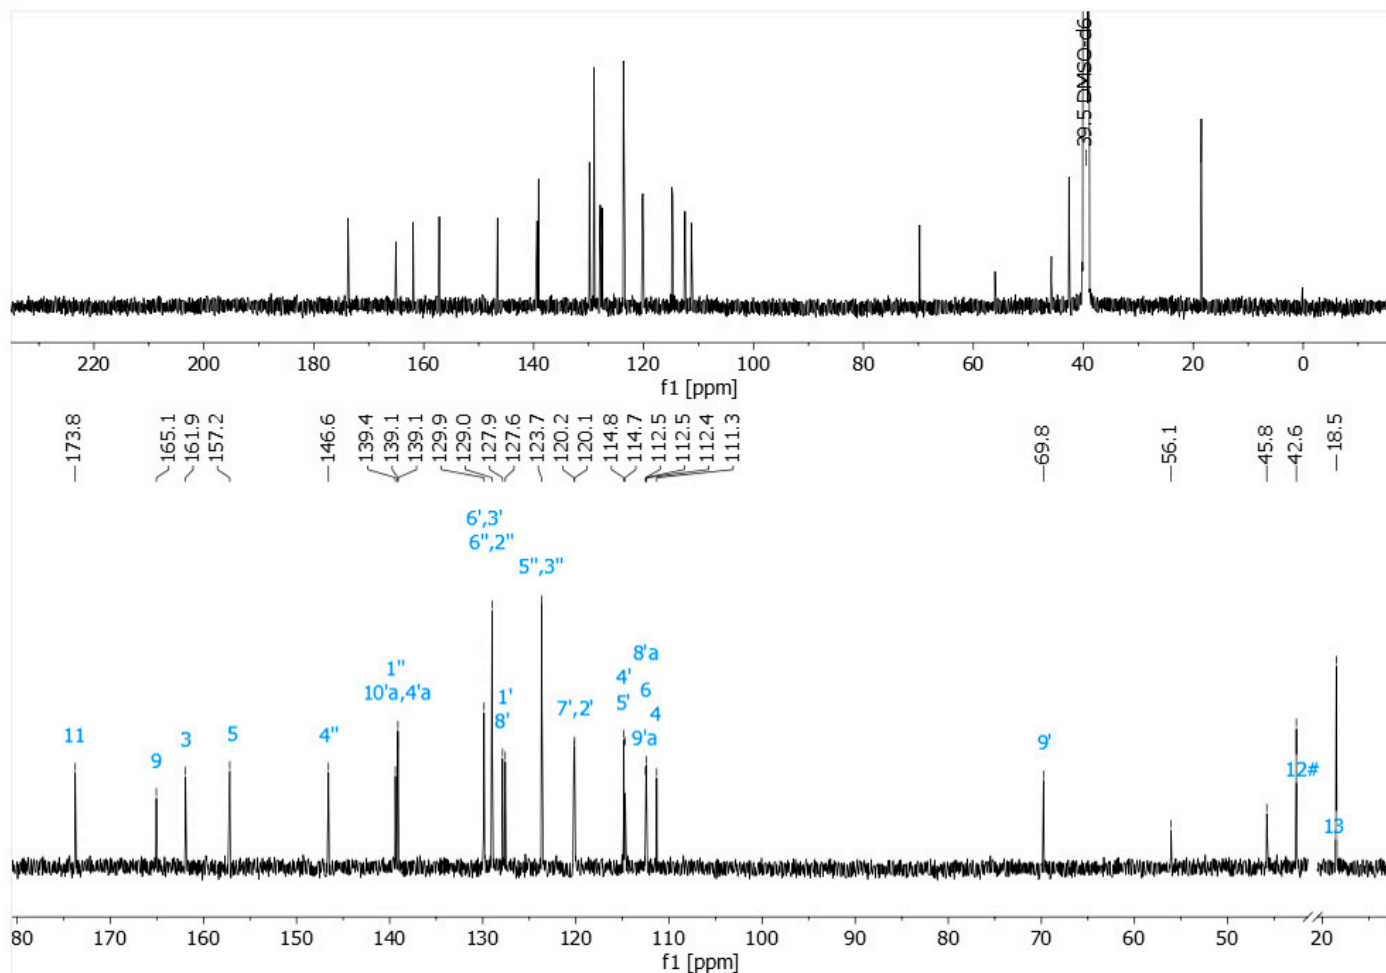

<sup>13</sup>C NMR (150 MHz, DMSO-d<sub>6</sub>) spectrum of derivative **9e**.

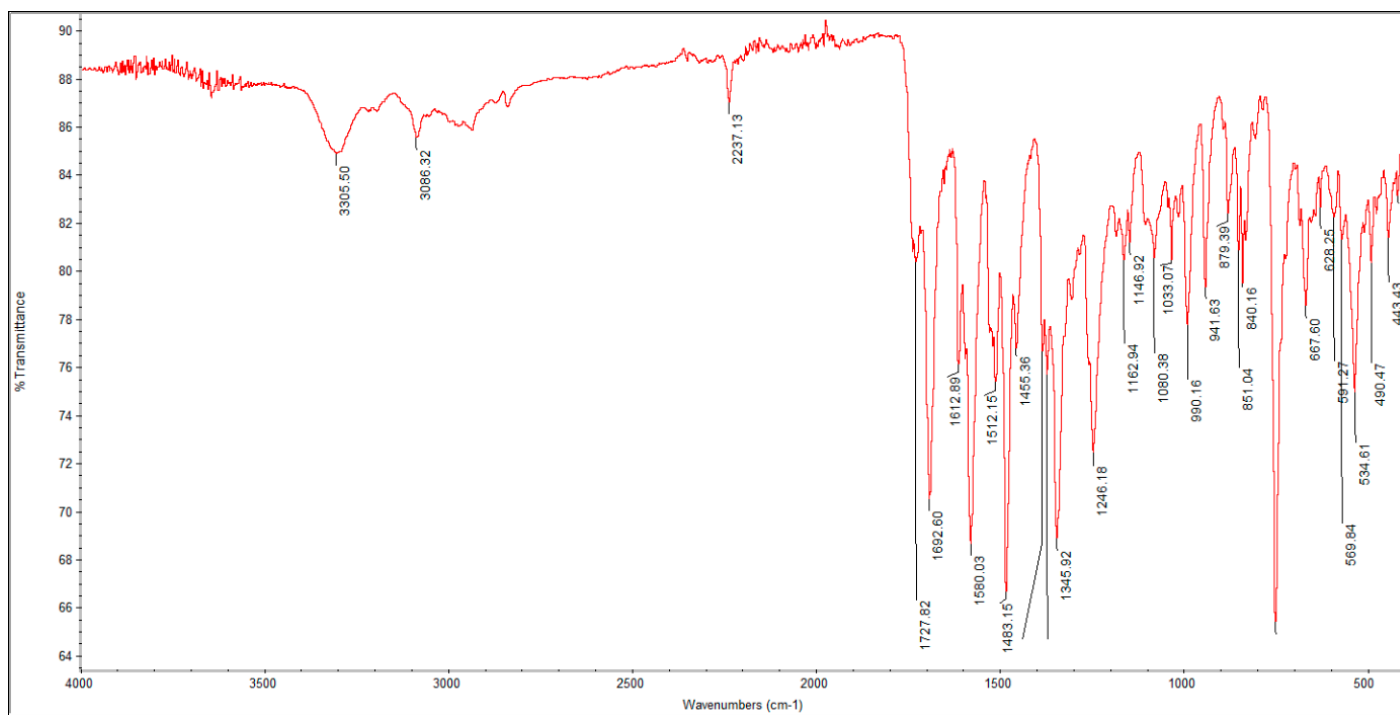

FTIR spectrum of derivative **9e**.

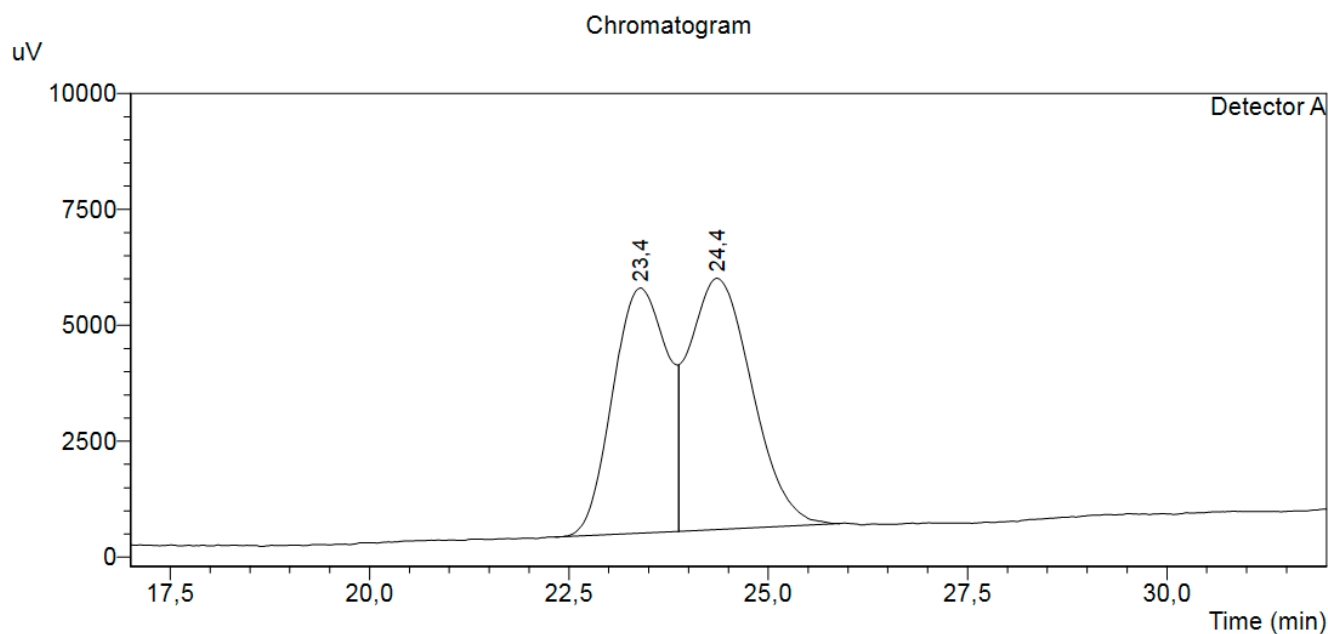

### <Peak Table>

Detector A

| Peak# | Ret. Time | Area   | Height | Conc.  | Unit | Area%   |
|-------|-----------|--------|--------|--------|------|---------|
| 1     | 23,395    | 253680 | 5281   | 45,935 |      | 45,935  |
| 2     | 24,358    | 298576 | 5414   | 54,065 |      | 54,065  |
| Total |           | 552256 | 10694  |        |      | 100,000 |

Chiral HPLC chromatogram of compound **9e**. Chiralpak IA column; flow rate of 0.5 mL/min; temperature 25 °C; *n*-hexane/acetone (75/25, v/v)

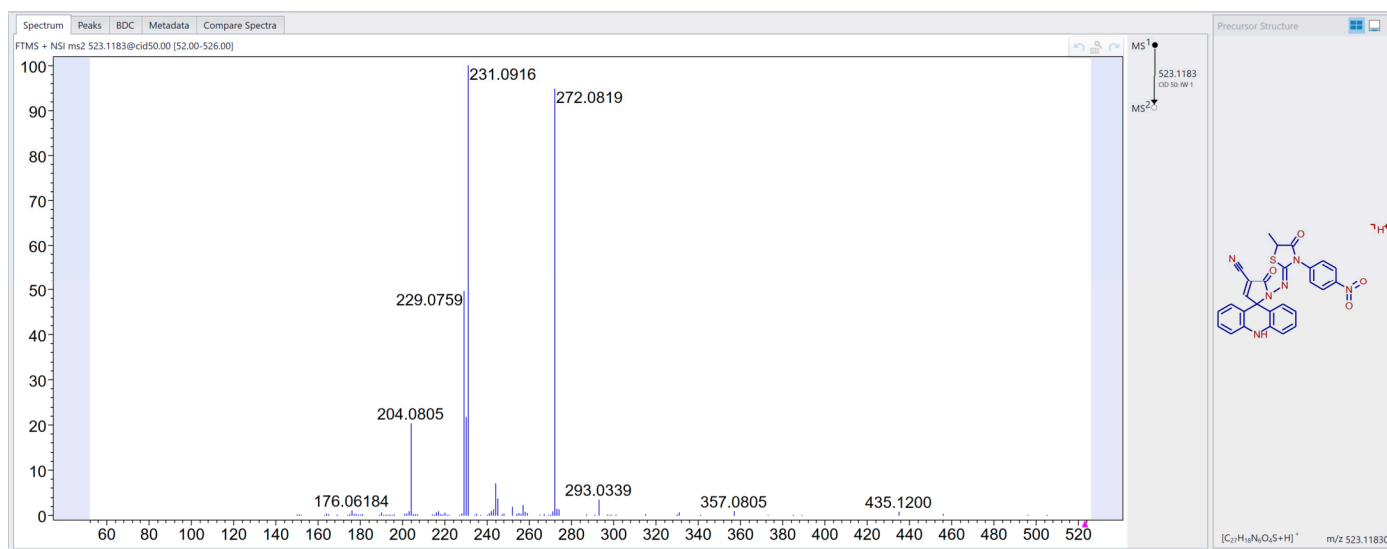

MS2 spectrum of derivative **9e**.



2.21 5'-Oxo-1'-{[(2Z)-4-oxo-3-phenyl-5-propyl-1,3-thiazolidin-2-ylidene]amino}-1',5'-dihydro-10*H*-spiro[acridine-9,2'-pyrrole]-4'-carbonitrile (**10a**)

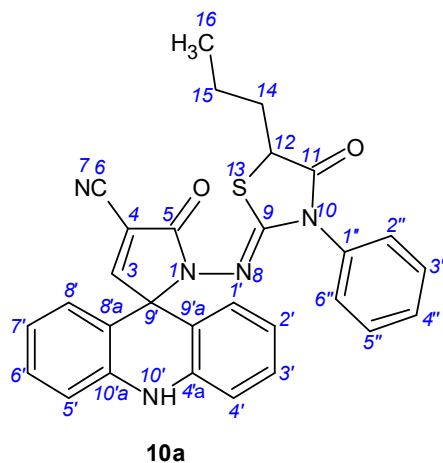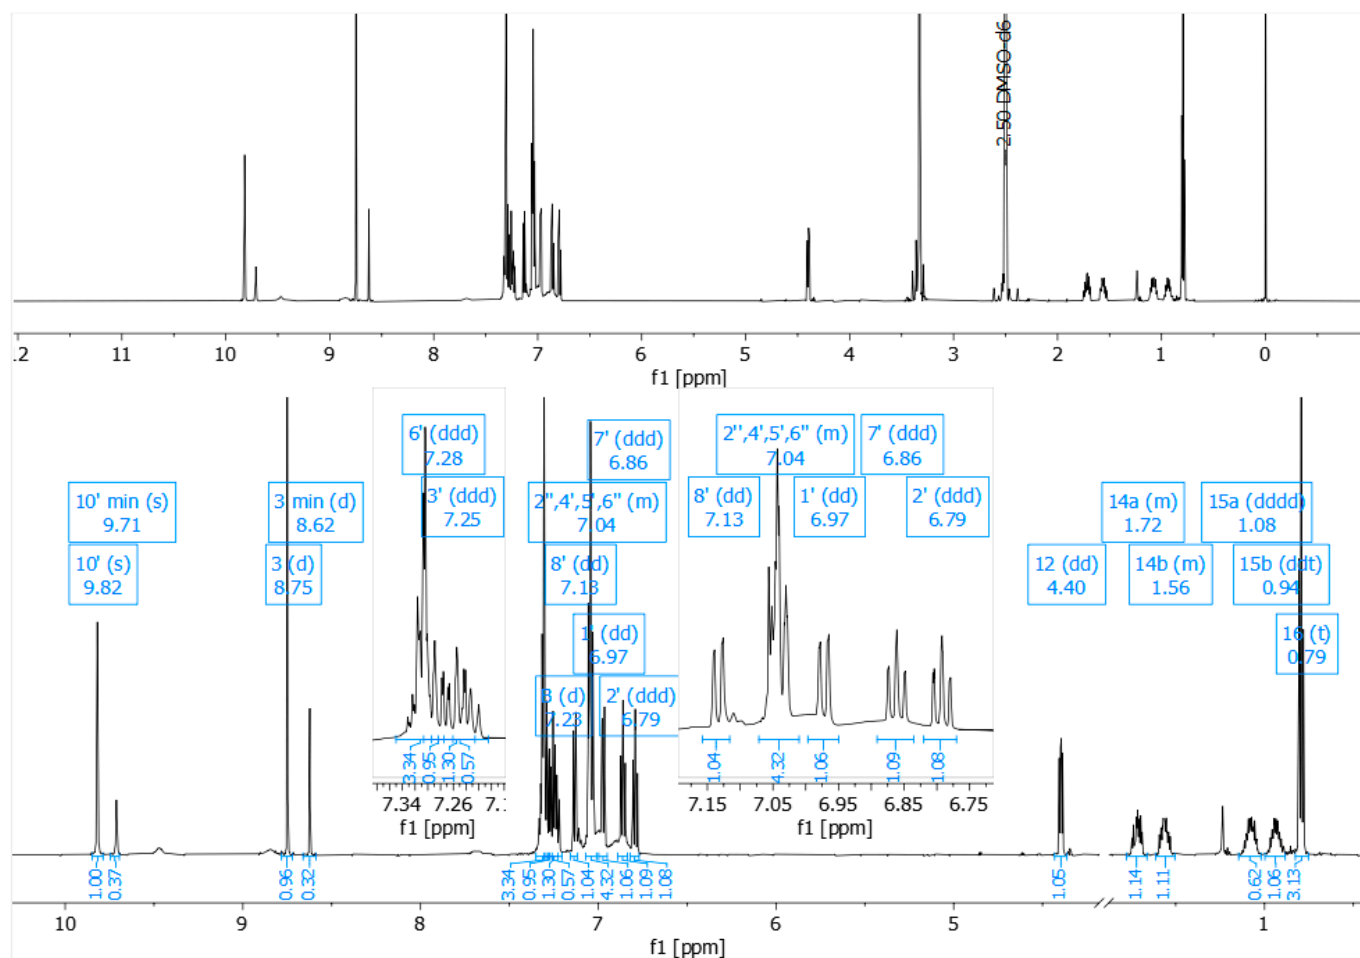

<sup>1</sup>H NMR (600 MHz, DMSO-*d*<sub>6</sub>) spectrum of derivative **10a**.

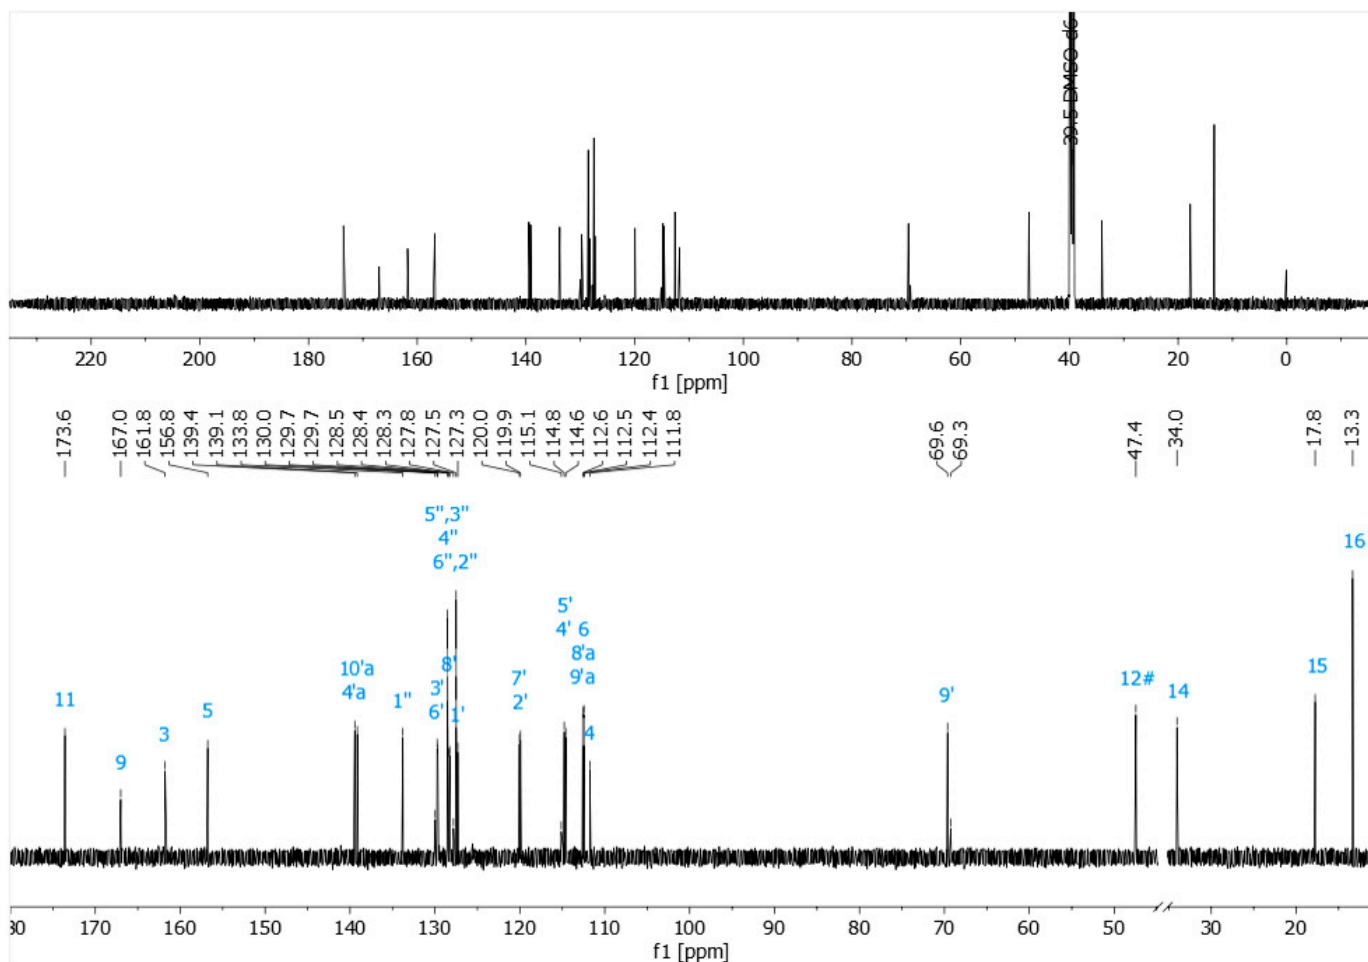

<sup>13</sup>C NMR (150 MHz, DMSO-d<sub>6</sub>) spectrum of derivative **10a**.

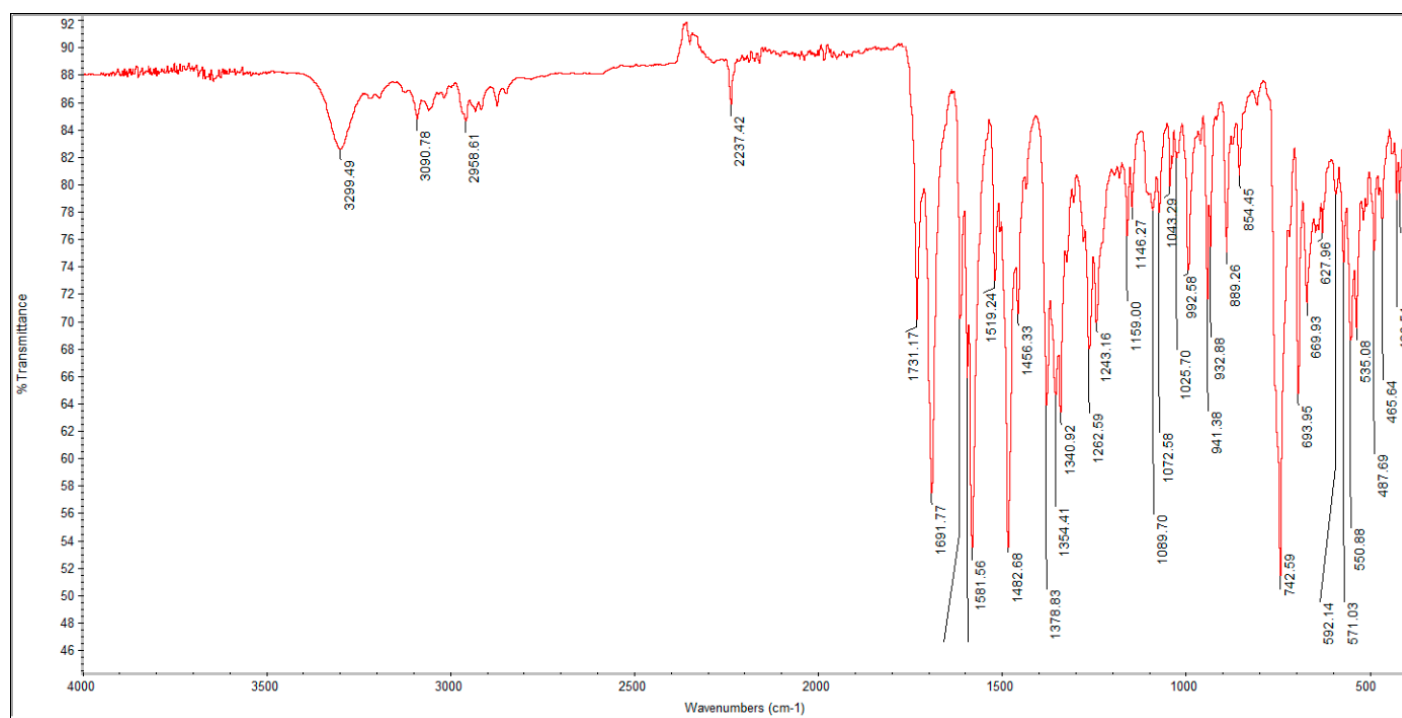

FTIR spectrum of derivative **10a**.

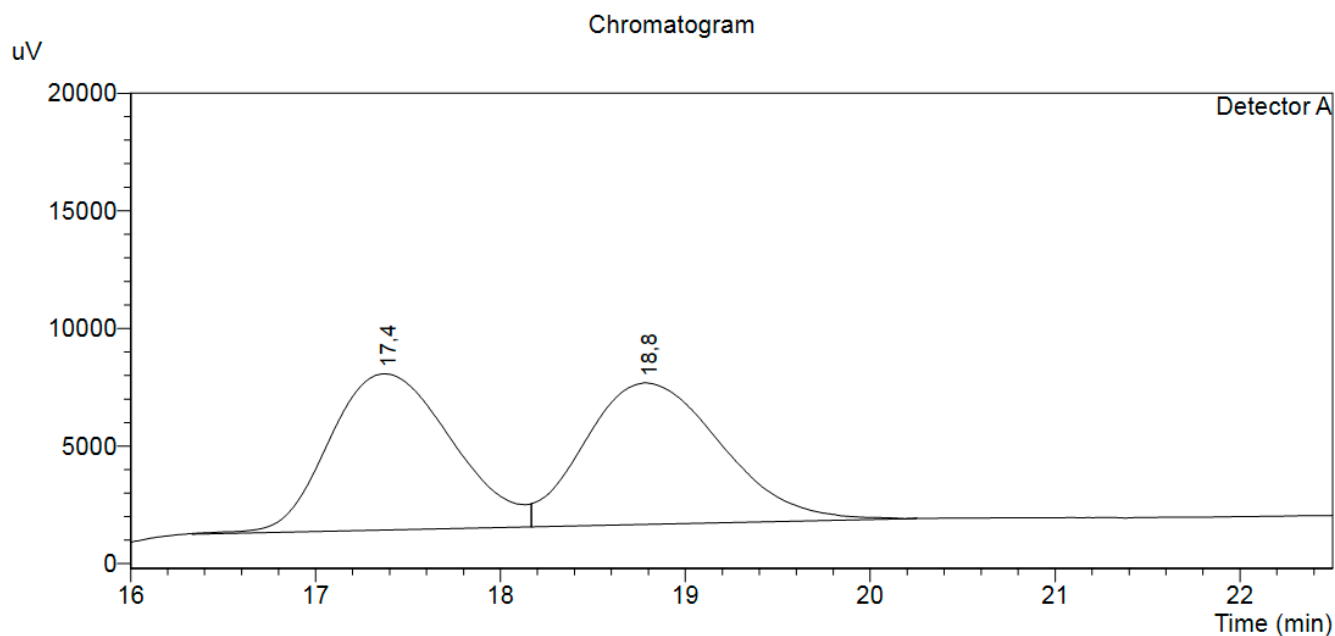

### <Peak Table>

Detector A

| Peak# | Ret. Time | Area   | Height | Conc.  | Unit | Area%   |
|-------|-----------|--------|--------|--------|------|---------|
| 1     | 17,376    | 306155 | 6615   | 49,745 |      | 49,745  |
| 2     | 18,788    | 309290 | 5991   | 50,255 |      | 50,255  |
| Total |           | 615444 | 12606  |        |      | 100,000 |

Chiral HPLC chromatogram of compound **10a**. Chiralpak IA column; flow rate of 0.5 mL/min; temperature 25 °C; *n*-hexane/acetone (75/25, v/v)

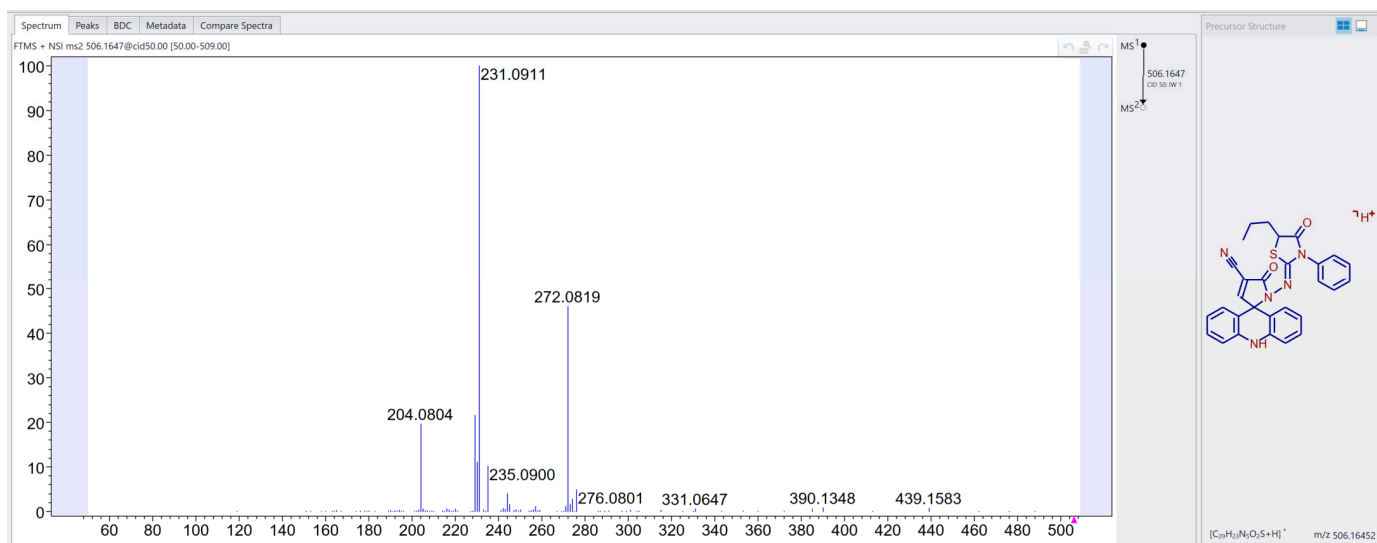

MS2 spectrum of derivative **10a**.

2.22 1'-{[(2Z)-3-(4-Methoxyphenyl)-4-oxo-5-propyl-1,3-thiazolidin-2-ylidene]amino}-5'-oxo-1',5'-dihydro-10*H*-spiro[acridine-9,2'-pyrrole]-4'-carbonitrile (**10b**)

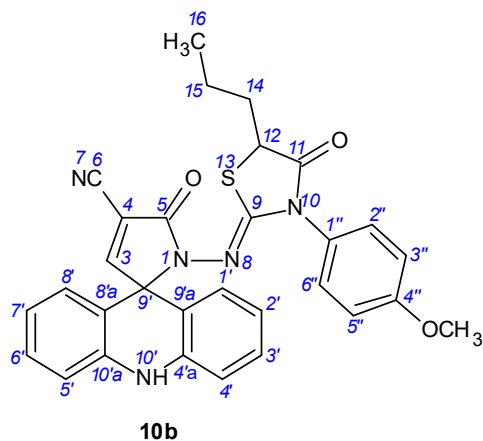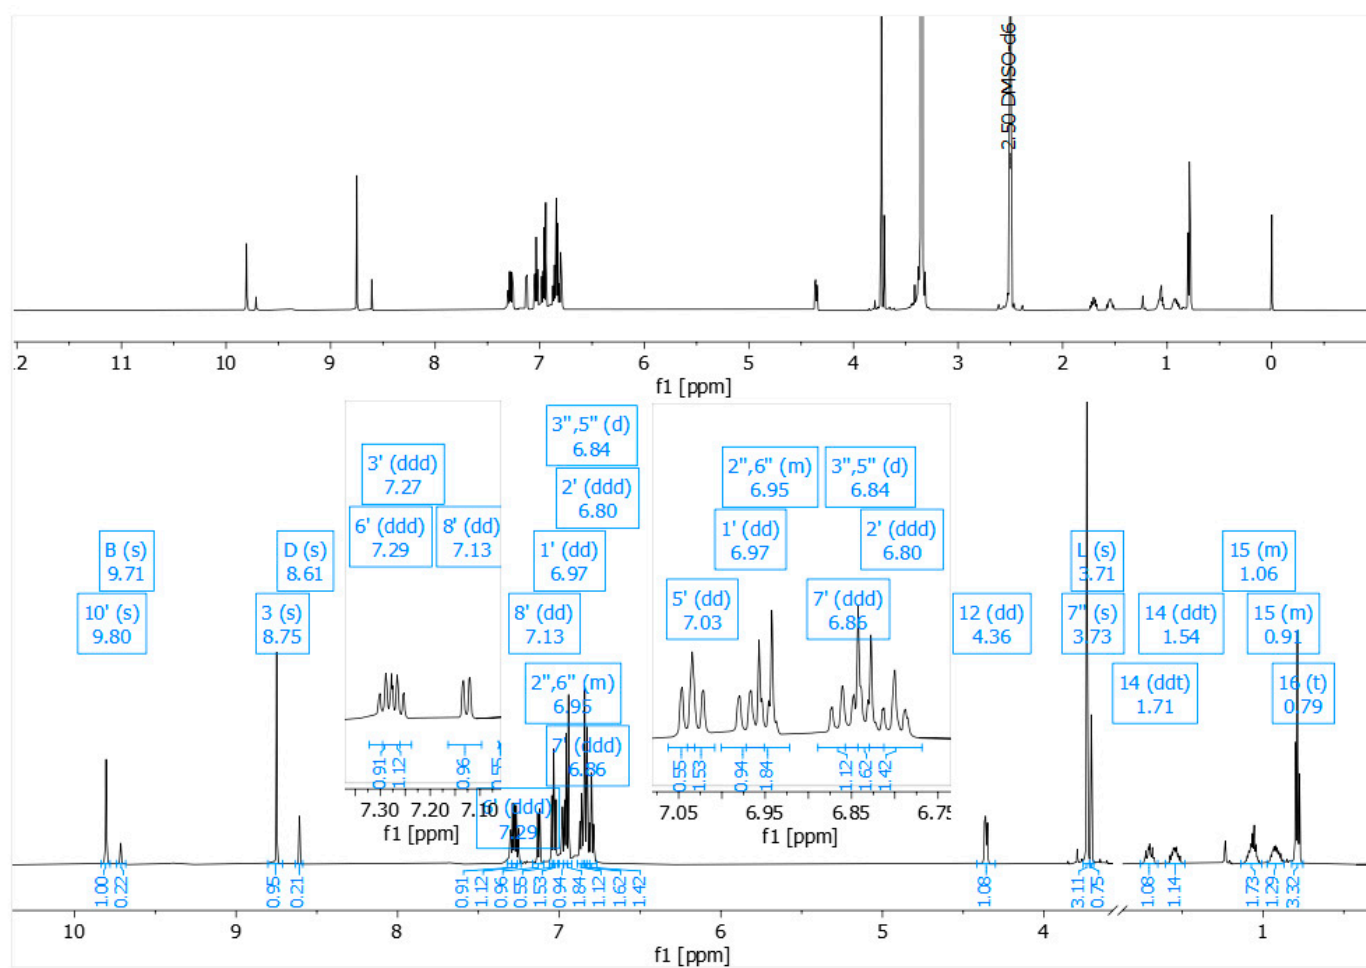

$^1\text{H}$  NMR (600 MHz, DMSO- $d_6$ ) spectrum of derivative **10b**.

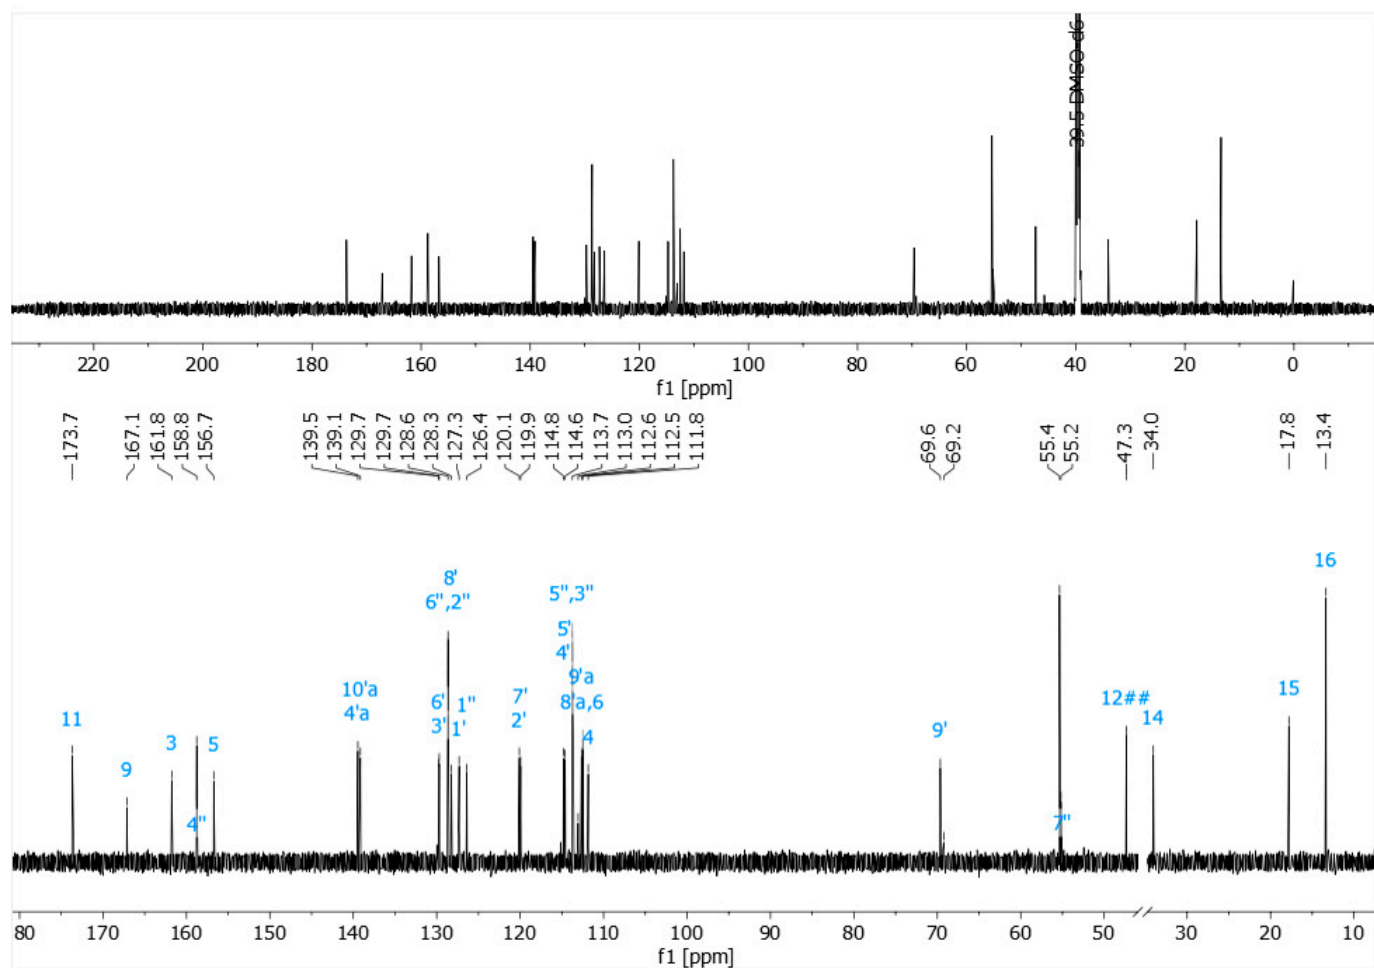

<sup>13</sup>C NMR (150 MHz, DMSO-d<sub>6</sub>) spectrum of derivative **10b**.

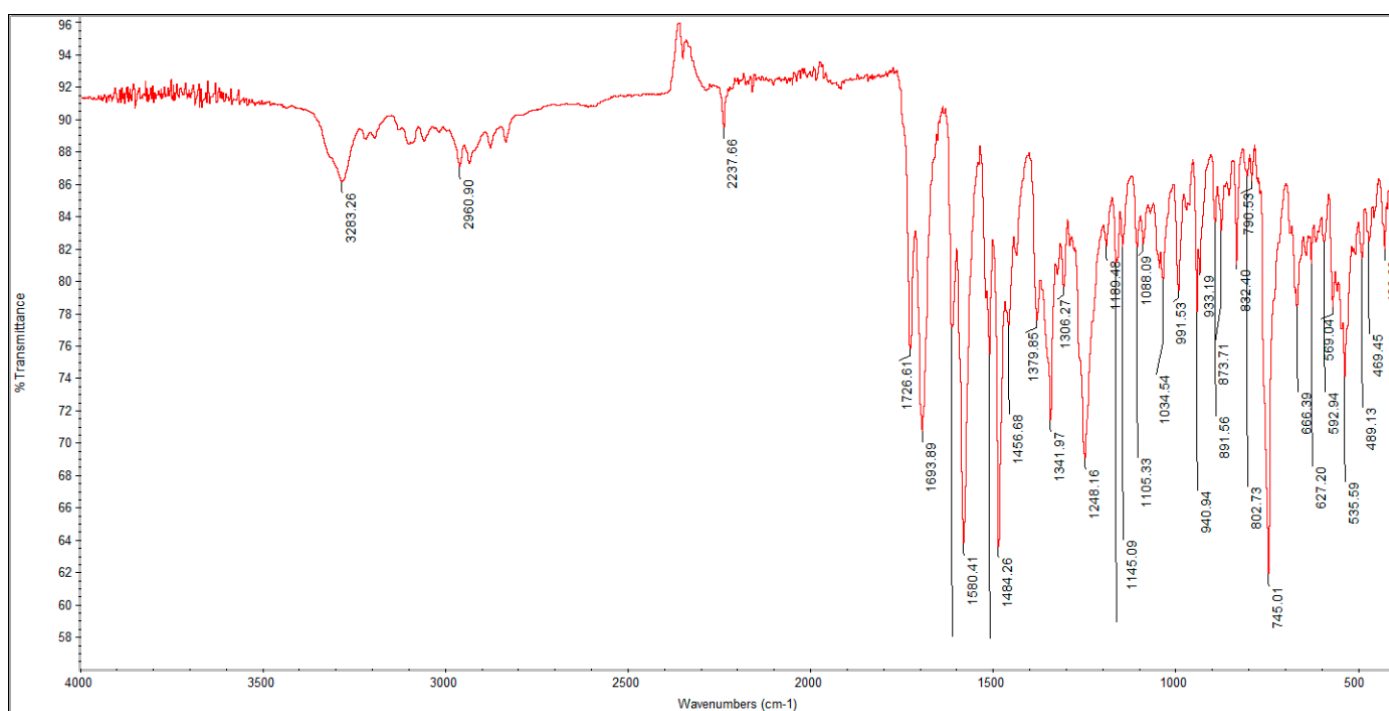

FTIR spectrum of derivative **10b**.

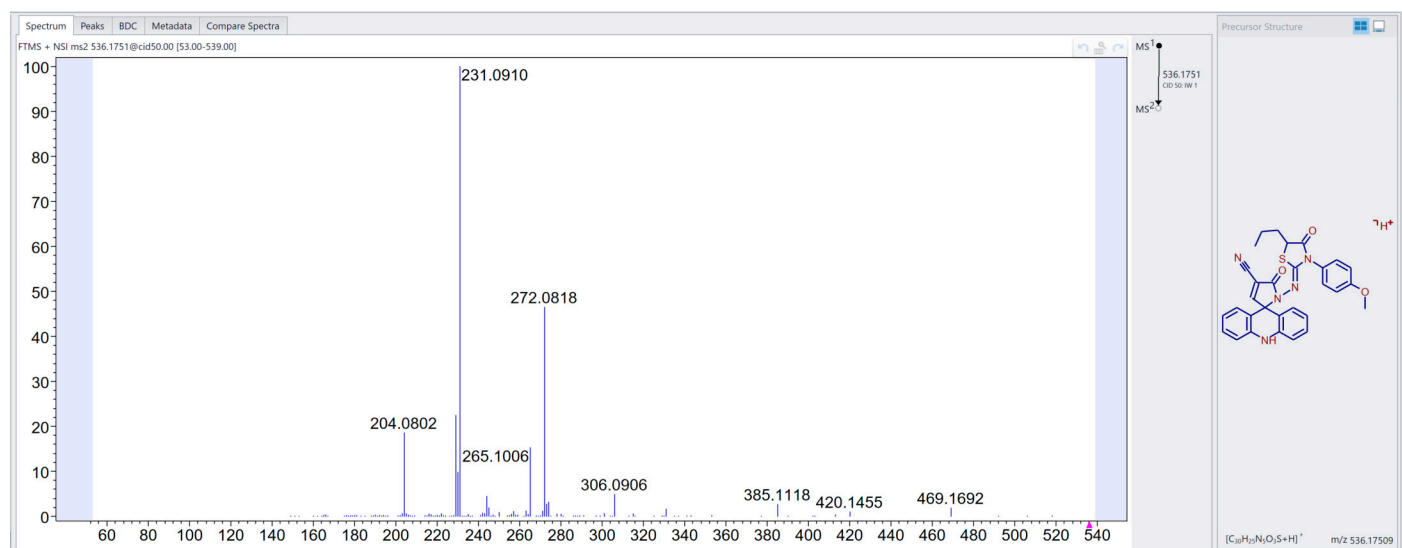

MS2 spectrum of derivative **10b**.

2.23 1'-{[(2Z)-3-(3-Methoxyphenyl)-4-oxo-5-propyl-1,3-thiazolidin-2-ylidene]amino}-5'-oxo-1',5'-dihydro-10H-spiro[acridine-9,2'-pyrrole]-4'-carbonitrile (**10c**)

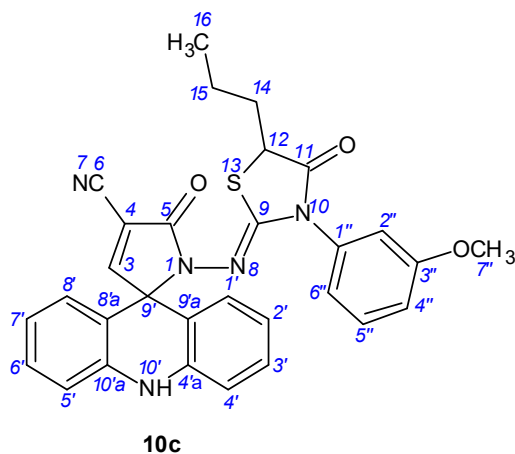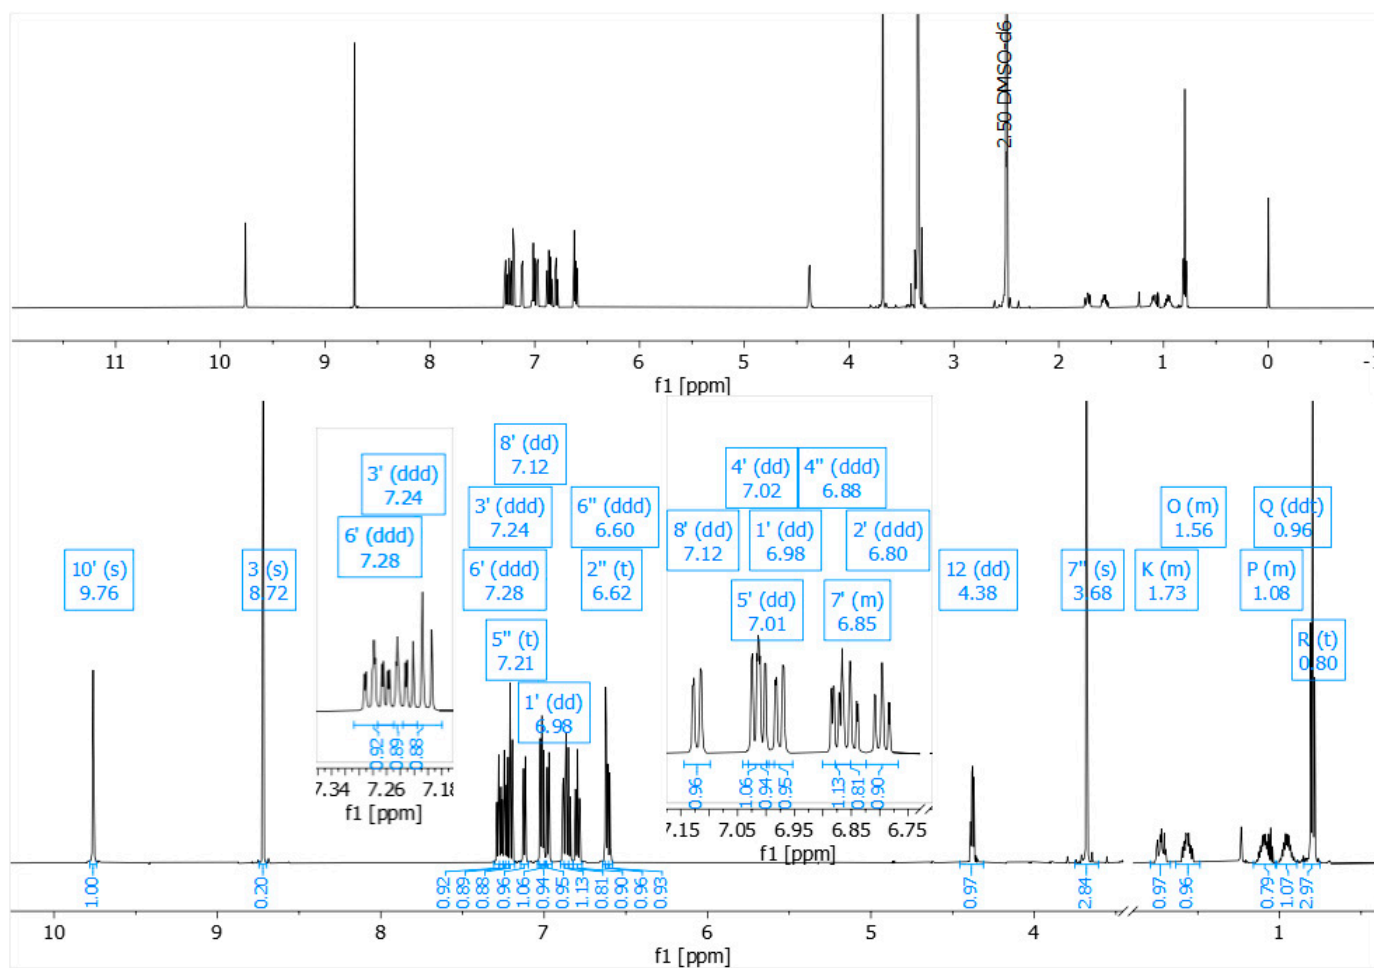

<sup>1</sup>H NMR (600 MHz, DMSO-d<sub>6</sub>) spectrum of derivative **10c**.

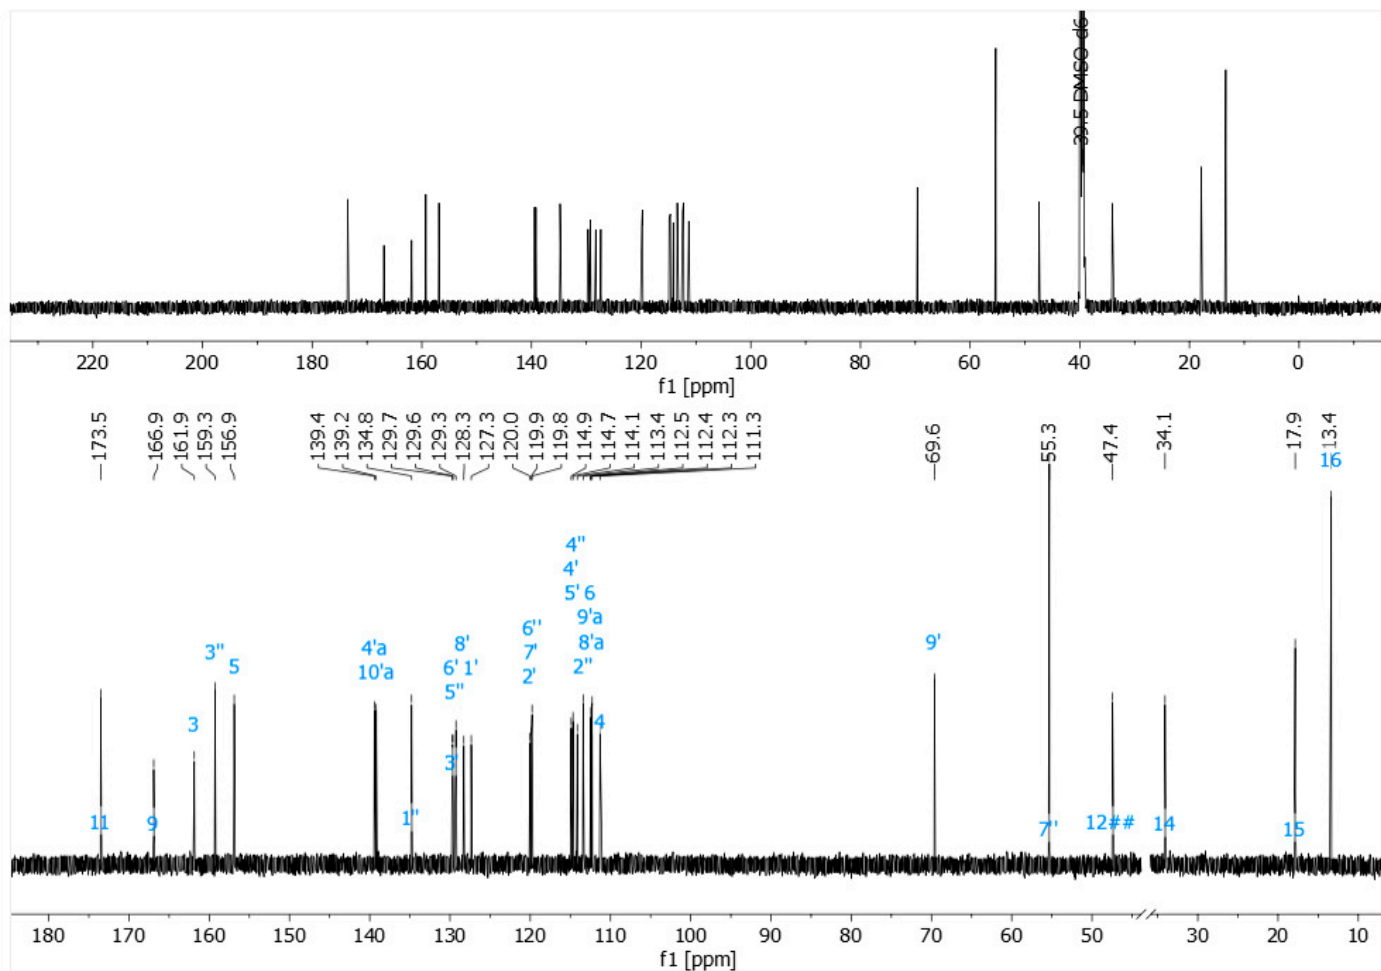

**<sup>13</sup>C NMR (150 MHz, DMSO-d<sub>6</sub>) spectrum of derivative 10c.**

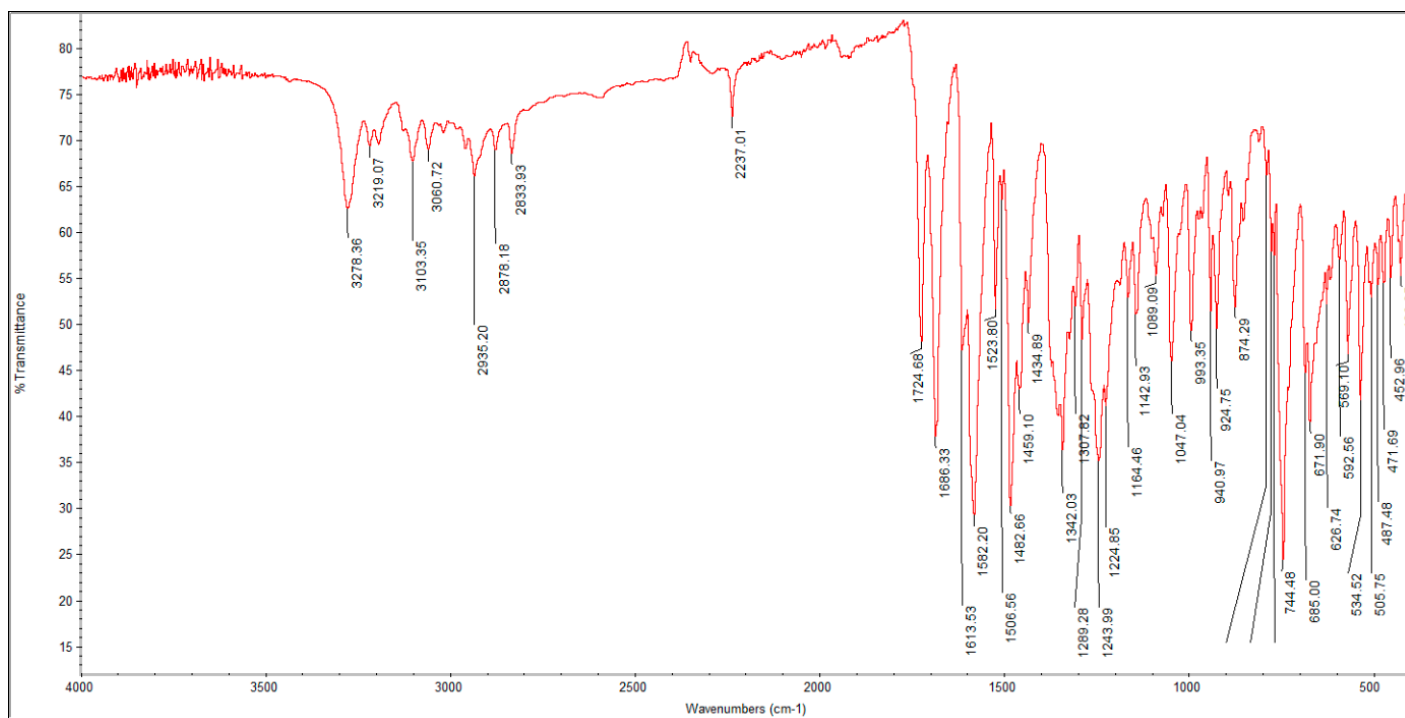

**FTIR spectrum of derivative 10c.**



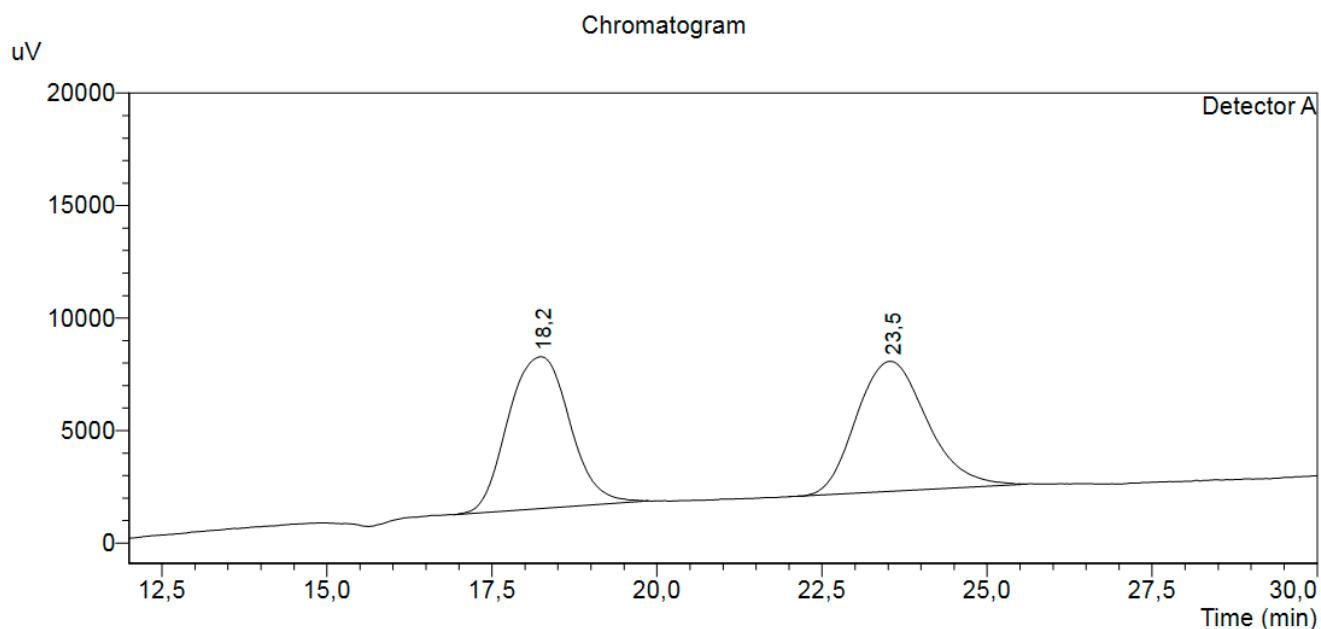

### <Peak Table>

Detector A

| Peak# | Ret. Time | Area   | Height | Conc.  | Unit | Area%   |
|-------|-----------|--------|--------|--------|------|---------|
| 1     | 18,236    | 438502 | 6731   | 50,411 |      | 50,411  |
| 2     | 23,533    | 431355 | 5768   | 49,589 |      | 49,589  |
| Total |           | 869857 | 12499  |        |      | 100,000 |

Chiral HPLC chromatogram of compound **10c**. Chiralpak IA column; flow rate of 0.5 mL/min; temperature 25 °C; *n*-hexane/acetone (75/25, v/v)

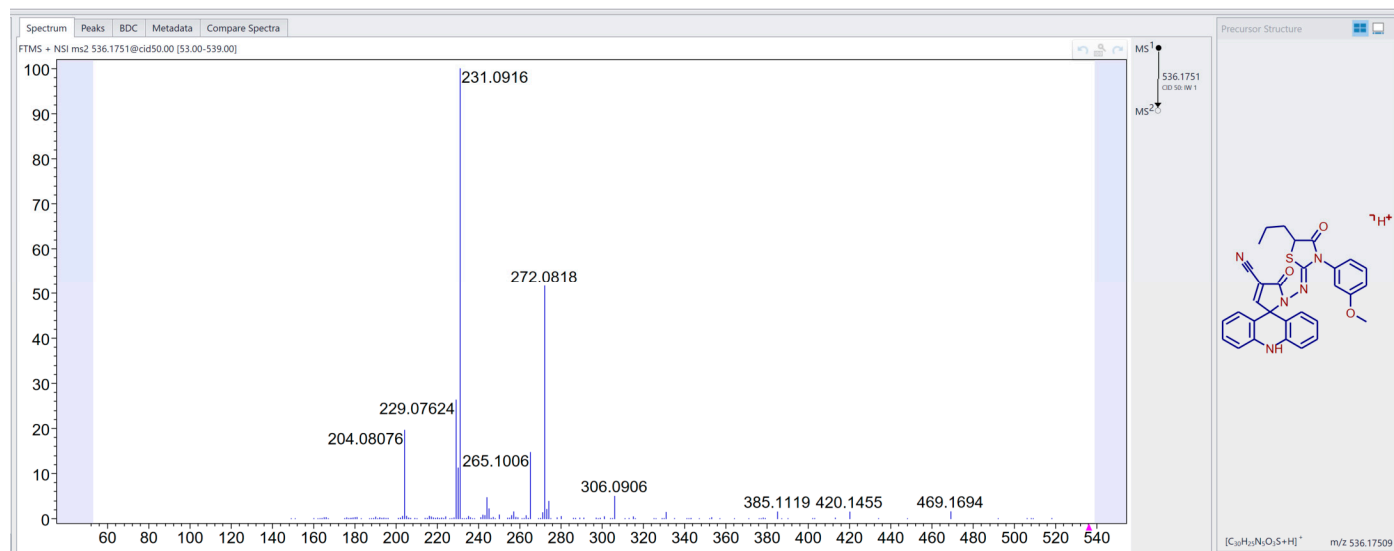

MS2 spectrum of derivative **10c**.

2.24 1'-{[(2Z)-3-(4-Fluorophenyl)-4-oxo-5-propyl-1,3-thiazolidin-2-ylidene]amino}-5'-oxo-1',5'-dihydro-10*H*-spiro[acridine-9,2'-pyrrole]-4'-carbonitrile (**10d**)

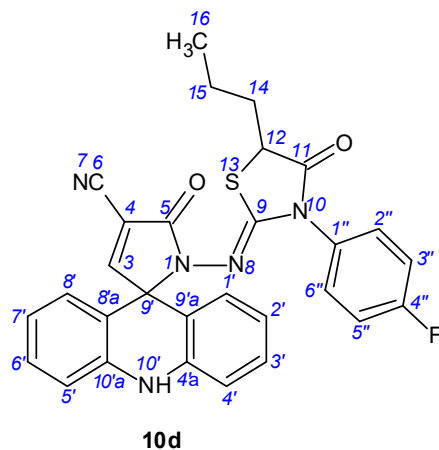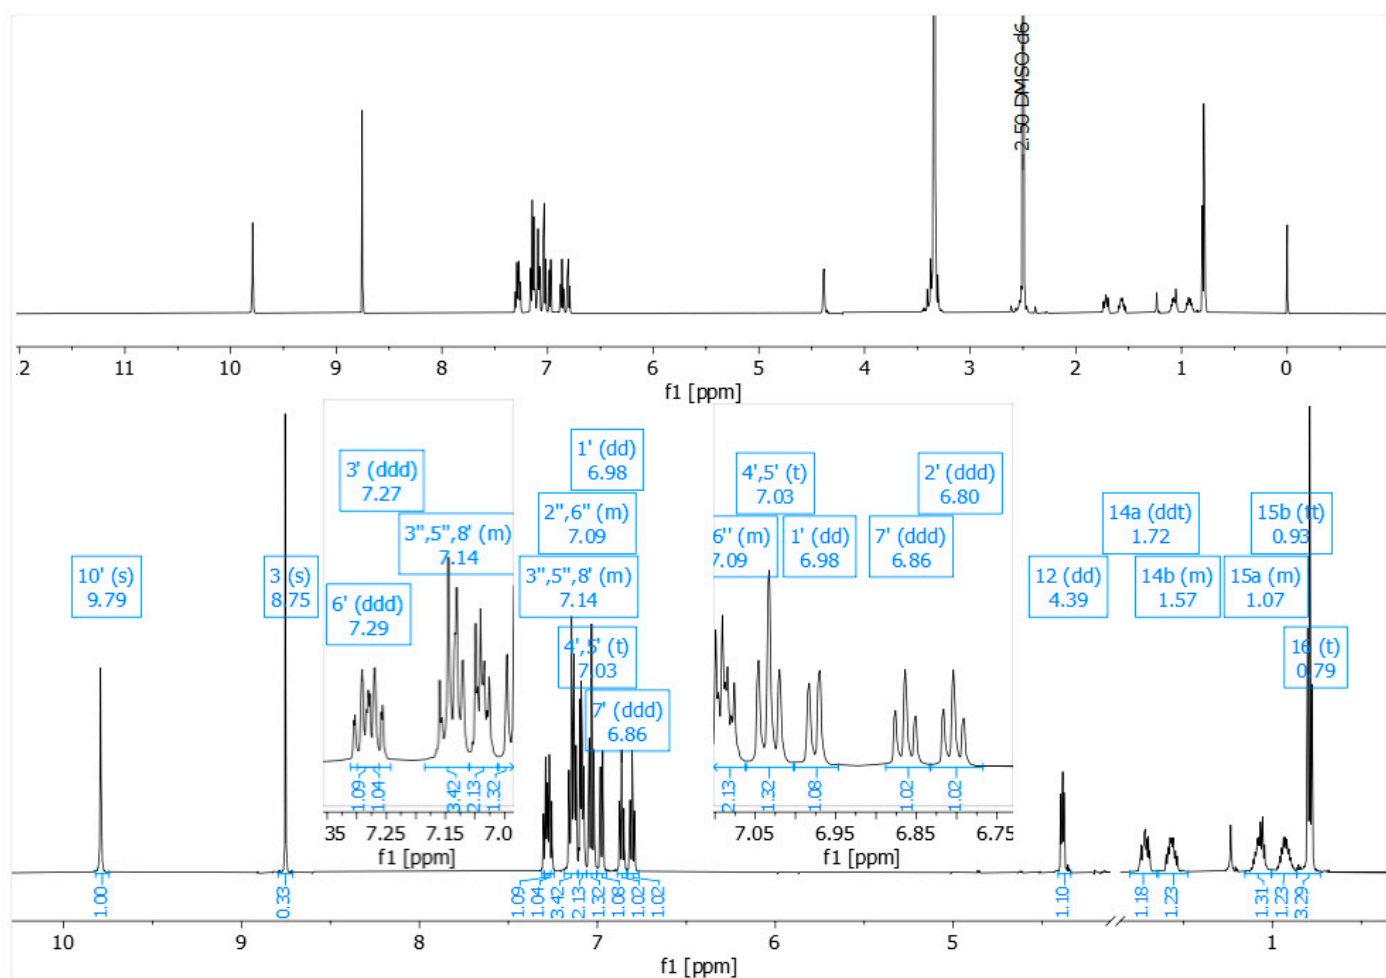

<sup>1</sup>H NMR (600 MHz, DMSO-d<sub>6</sub>) spectrum of derivative **10d**.

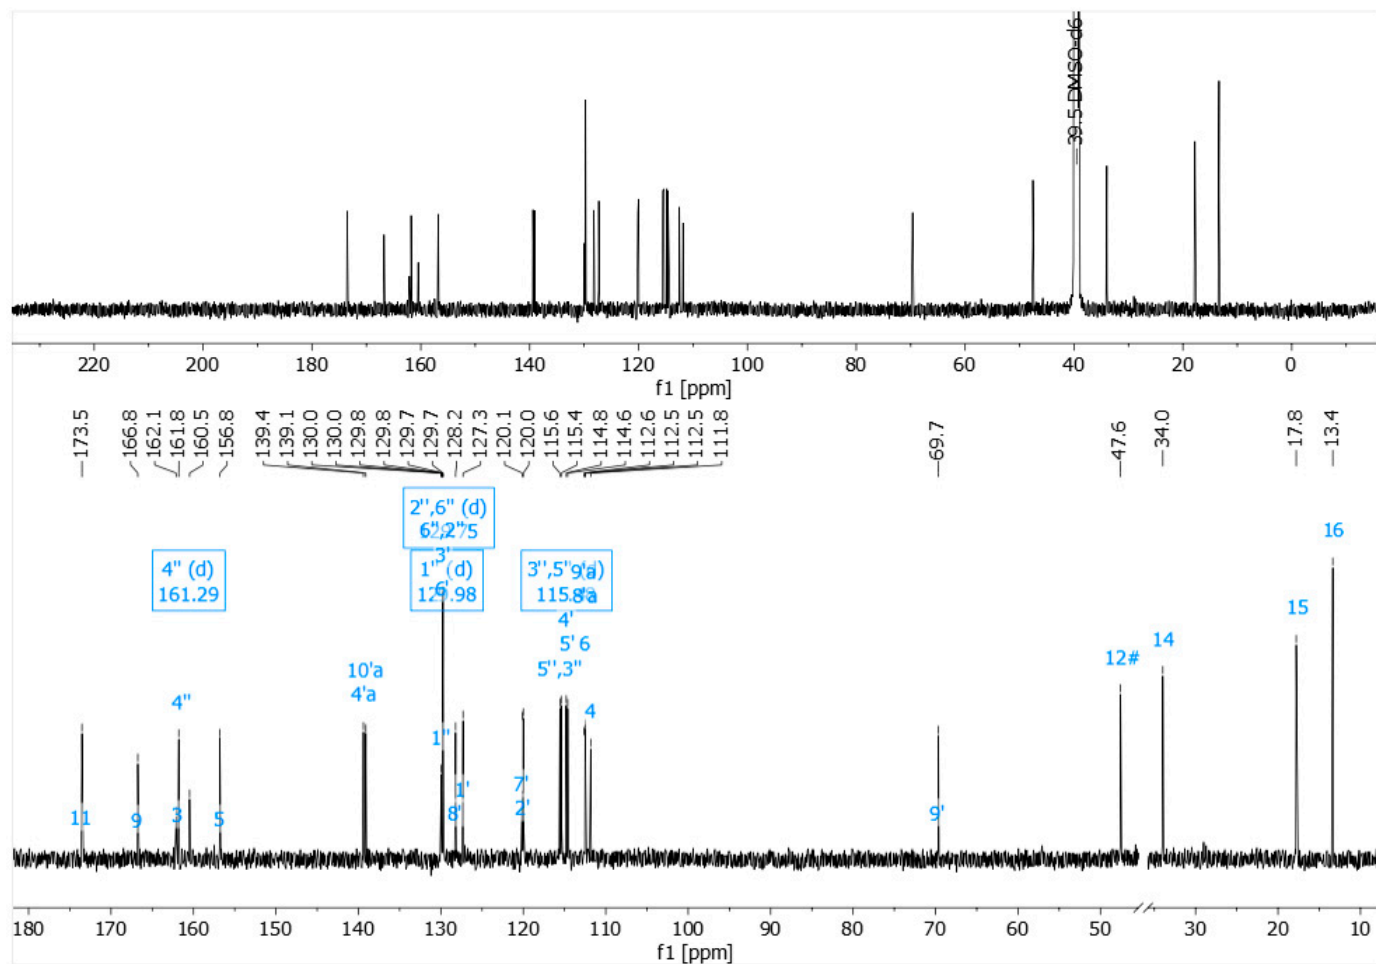

**<sup>13</sup>C NMR (150 MHz, DMSO-d<sub>6</sub>) spectrum of derivative 10d.**

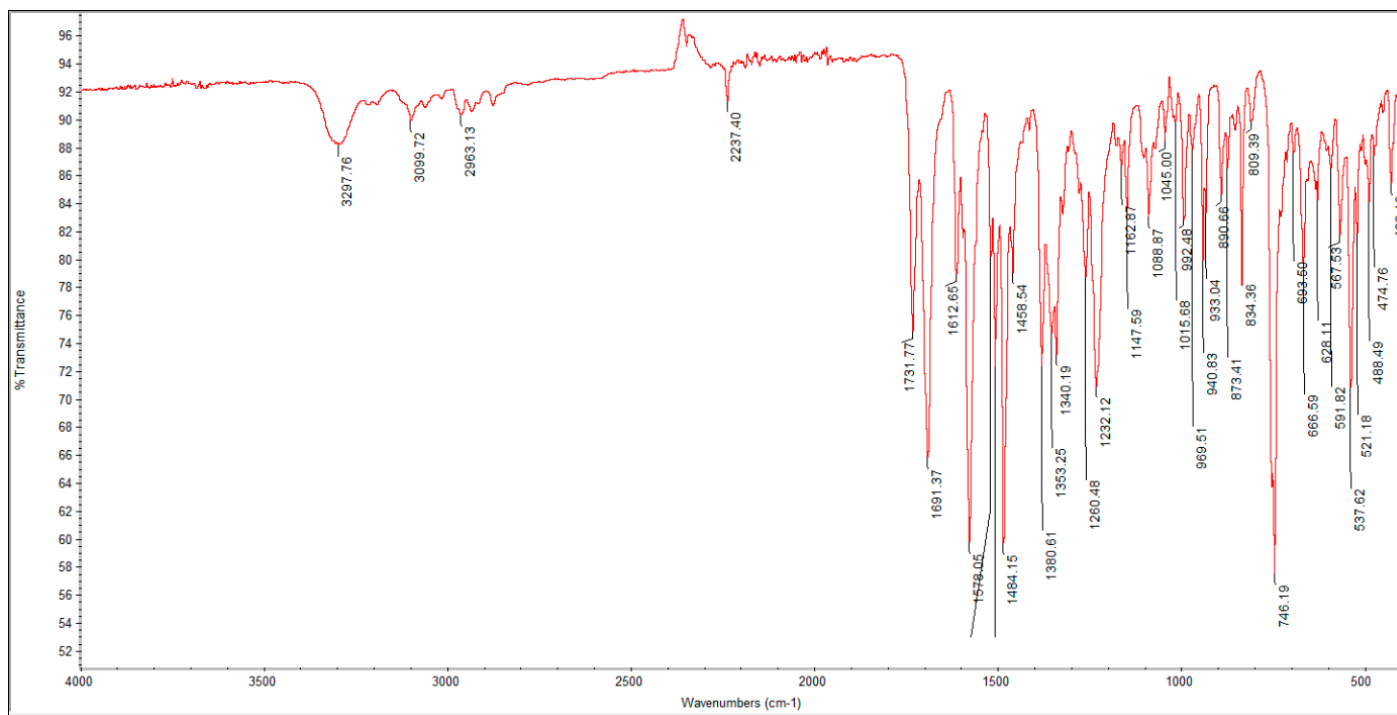

**FTIR spectrum of derivative 10d.**

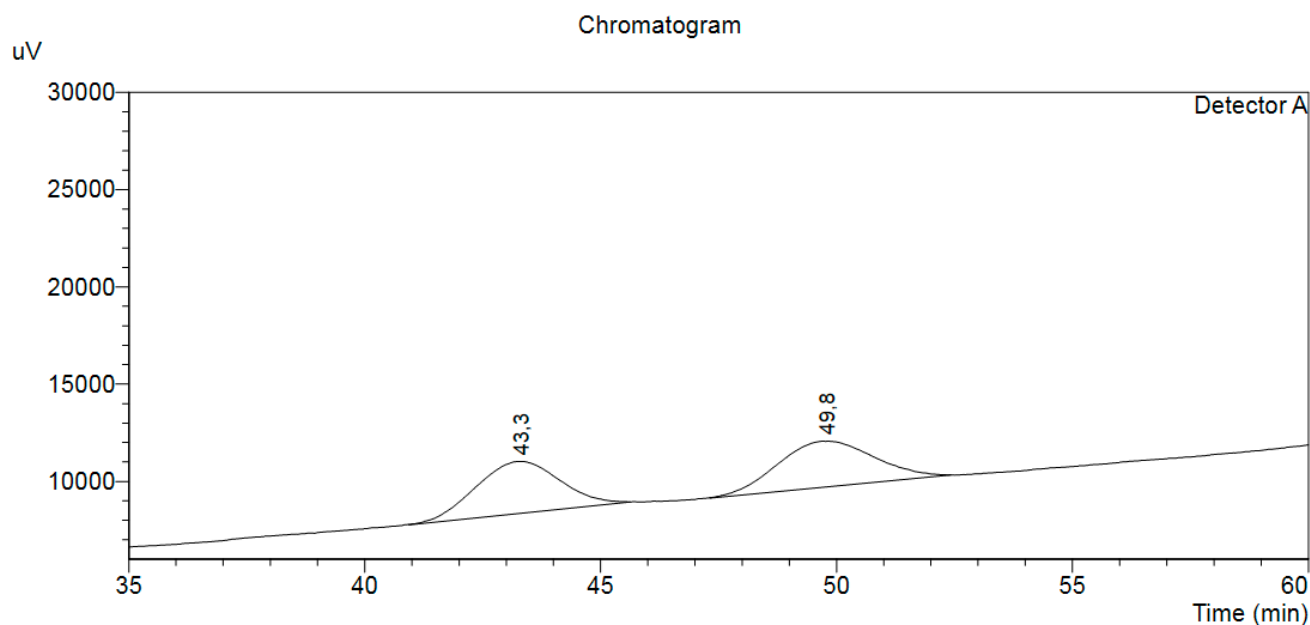

### <Peak Table>

Detector A

| Peak# | Ret. Time | Area   | Height | Conc.  | Unit | Area%   |
|-------|-----------|--------|--------|--------|------|---------|
| 1     | 43,296    | 331678 | 2660   | 49,784 |      | 49,784  |
| 2     | 49,773    | 334556 | 2349   | 50,216 |      | 50,216  |
| Total |           | 666233 | 5009   |        |      | 100,000 |

Chiral HPLC chromatogram of compound **10d**. Chiralpak IA column; flow rate of 0.5 mL/min; temperature 25 °C; *n*-hexane/acetone (85/15, v/v)

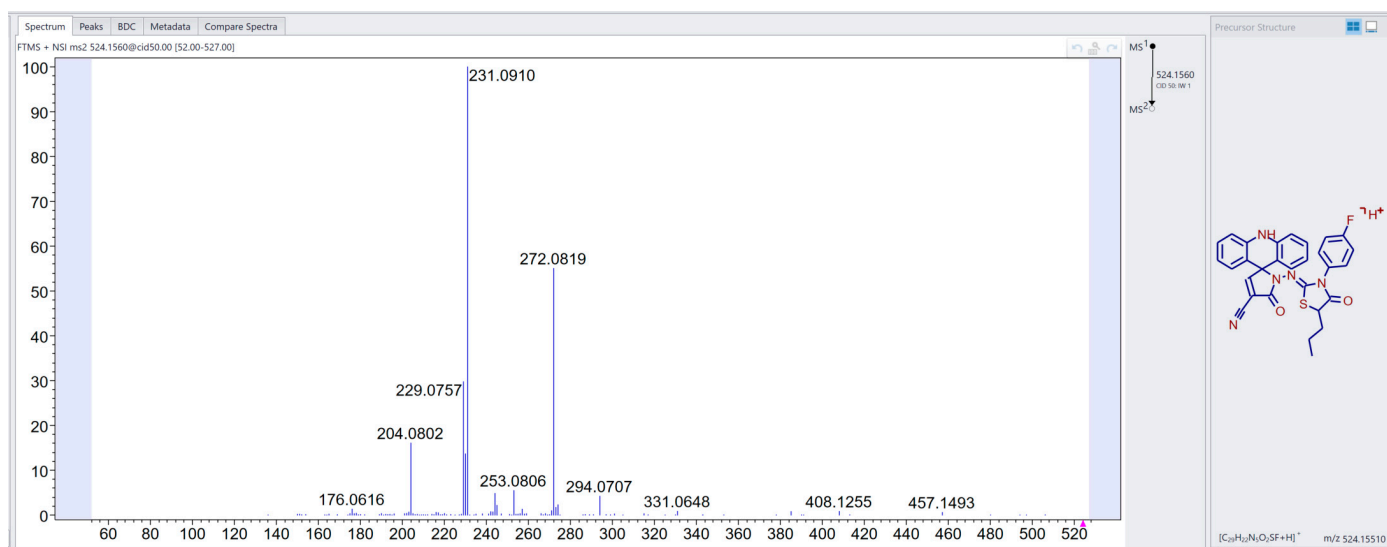

MS2 spectrum of derivative **10d**.

2.25 1'-{[(2Z)-3-(4-Nitrophenyl)-4-oxo-5-propyl-1,3-thiazolidin-2-ylidene]amino}-5'-oxo-1',5'-dihydro-10*H*-spiro[acridine-9,2'-pyrrole]-4'-carbonitrile (**10e**)

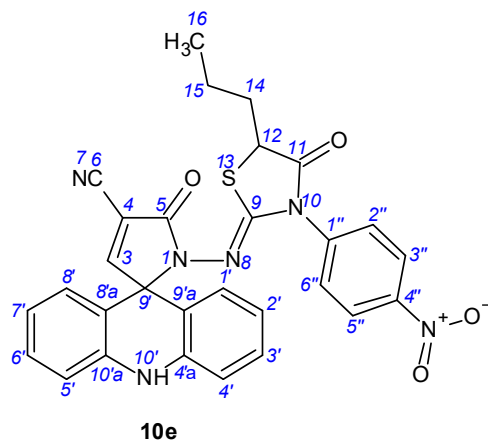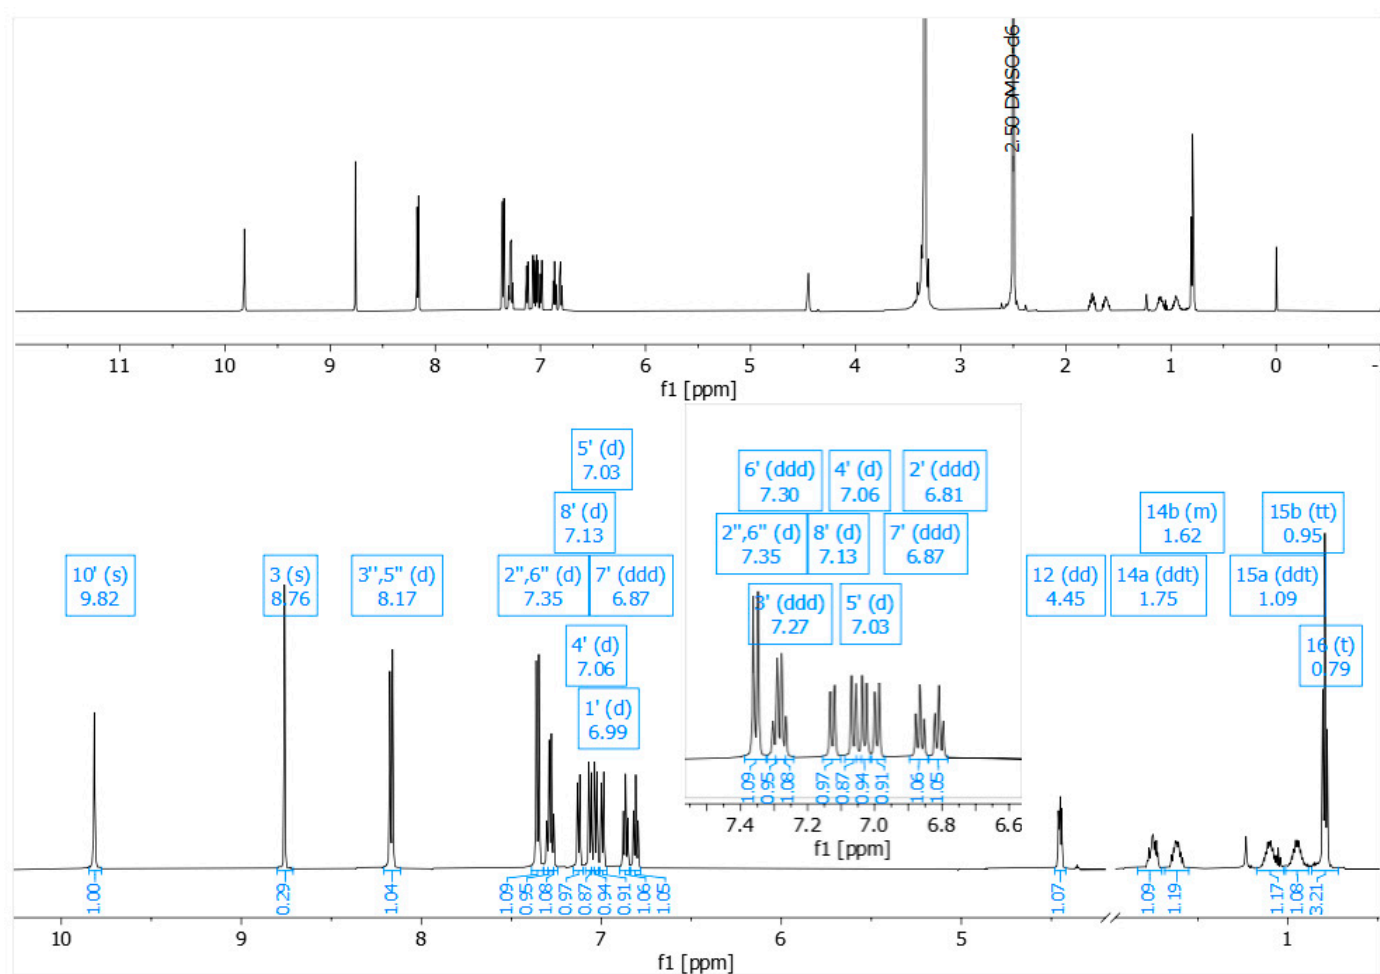

<sup>1</sup>H NMR (600 MHz, DMSO-d<sub>6</sub>) spectrum of derivative **10e**.

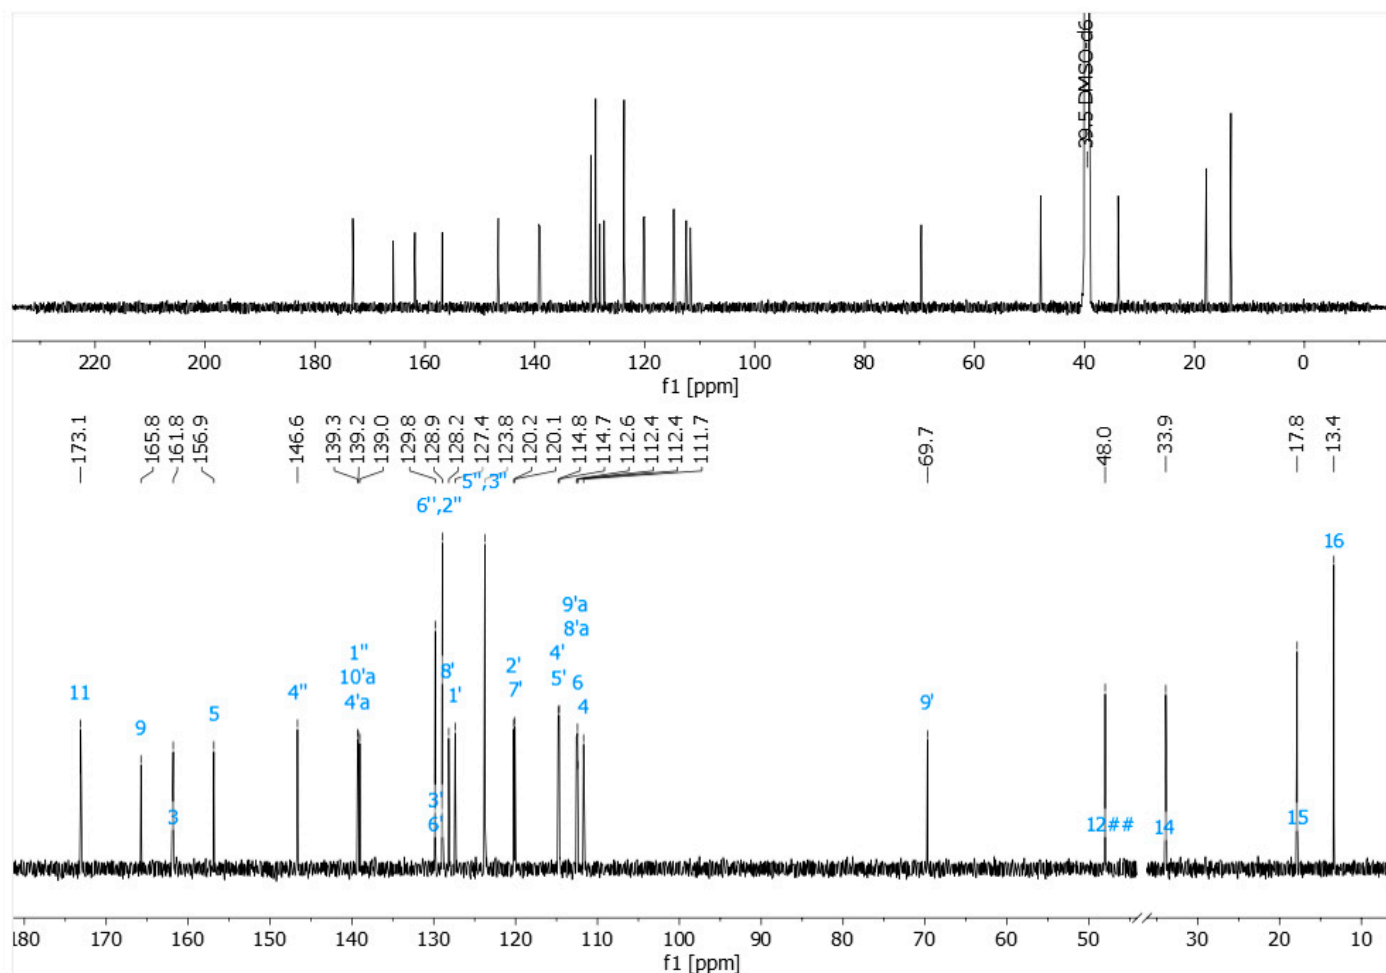

**<sup>13</sup>C NMR (150 MHz, DMSO-d<sub>6</sub>) spectrum of derivative 10e.**

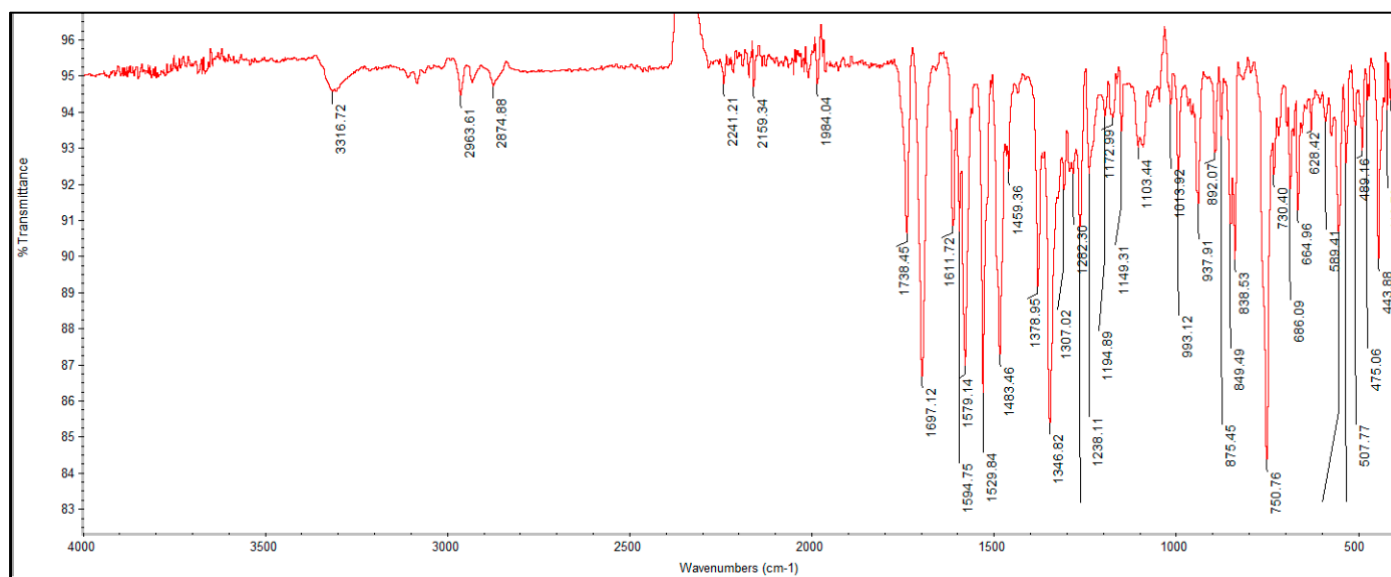

**FTIR spectrum of derivative 10e.**

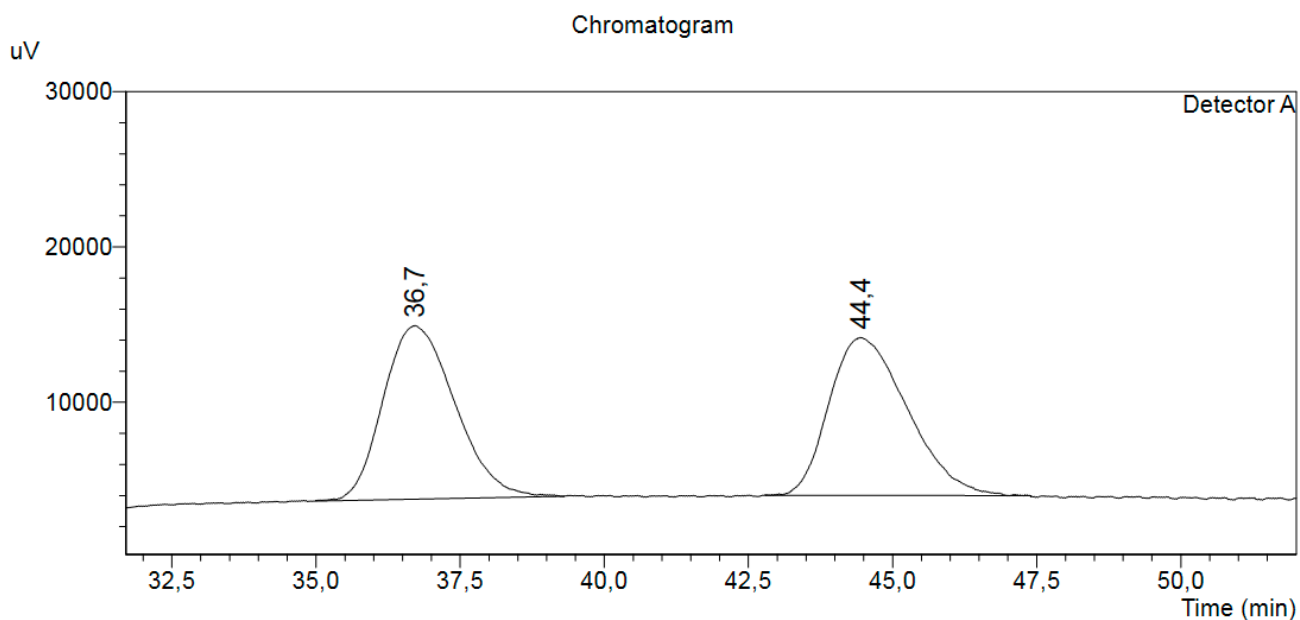

### <Peak Table>

Detector A

| Peak# | Ret. Time | Area    | Height | Conc.  | Unit | Area%   |
|-------|-----------|---------|--------|--------|------|---------|
| 1     | 36,713    | 965921  | 11103  | 50,198 |      | 50,198  |
| 2     | 44,447    | 958295  | 10137  | 49,802 |      | 49,802  |
| Total |           | 1924216 | 21239  |        |      | 100,000 |

Chiral HPLC chromatogram of compound **10e**. Chiralpak IA column; flow rate of 0.5 mL/min; temperature 25 °C; *n*-hexane/acetone (75/25, v/v)

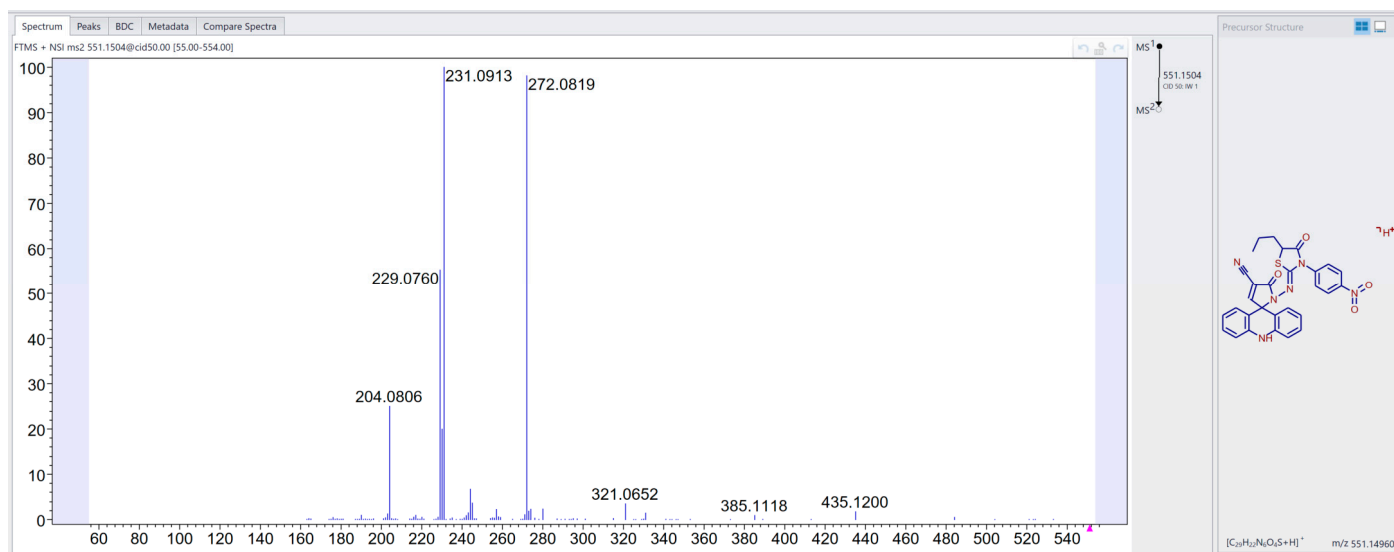

MS2 spectrum of derivative **10e**.
